# Supplementary material for: l-Proline-catalyzed three-component domino reactions in the regioselective synthesis of novel densely functionalized pyrazolo[3,4-b]pyridines
Source: Royal Society of Chemistry journal article supplement (doi:10.1039/c3ra00136a), 2013-01-01
Supplement: c3ra00136a.pdf [file c3ra00136a.pdf]

Supplementary Material (ESI) for **RSC Advances**  
This journal is © The Royal Society of Chemistry

## Supporting Information

### **L-Proline-catalyzed three-component domino reactions in the synthesis of novel densely functionalized pyrazolo[3,4-*b*]pyridines**

**Pethaiah Gunasekaran, Sethuraman Indumathi and Subbu Perumal<sup>a</sup>**

<sup>a</sup>*Department of Organic Chemistry, School of Chemistry, Madurai Kamaraj University, Madurai 625021, India.  
Fax: 91-452-2459845. E-mail: subbu.perum@gmail.com.*

### Supporting Information

- (i) NMR discussion
- (ii) Copies of NMR spectra and ESI-MS for compounds **4a-4w**.
- (iii) Copies of <sup>19</sup>FNMR spectra for eight representative compounds.
- (iv) Mechanism study - NMR spectra.

## NMR discussion

### 1. Structure determination of **4a**.

The structure of 3-methyl-1-aryl-1*H*-pyrazolo[3,4-*b*]pyridine derivatives **4** is in accord with elemental analysis and spectroscopic ( $^1\text{H}$ ,  $^{13}\text{C}$  and 2D NMR) data as illustrated for a representative example **4a**.

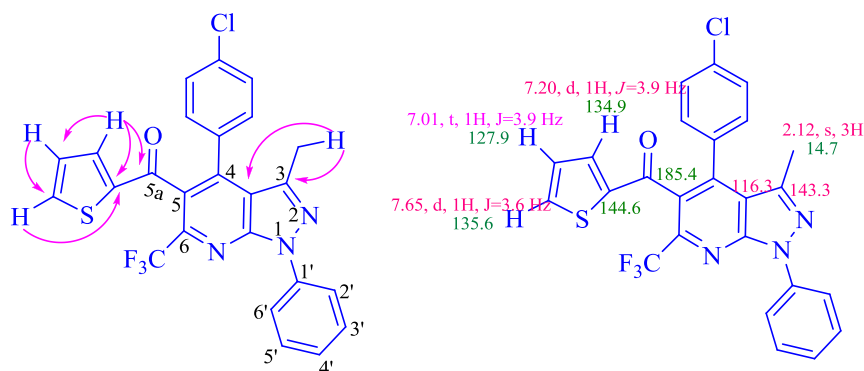

Figure 1. Selected  $^1\text{H}$  and  $^{13}\text{C}$  chemical shifts of **4a**

In the  $^1\text{H}$  NMR spectrum of **4c**, the H-3'' gives a doublet at 7.20 ppm ( $J = 3.9$  Hz), which shows (i) a C,H-COSY correlation with carbon signal at 134.9 ppm, assigning it to C-3'' and (ii) HMBCs (Figure 2) with C-5a, C-2'', C-4'' at 185.4, 144.6 and 127.9 ppm respectively. Similarly, the H-4'' gives a triplet at 7.01 ppm ( $J = 3.9$  Hz), which shows (i) a C,H-COSY correlation with carbon signal at 127.9 ppm assigning it to C-4'' and (ii) HMBCs with C-2'' and C-5'' at 144.6 and 135.6 ppm respectively. The H-5'' gives a doublet at 7.65 ppm ( $J = 3.6$  Hz) and C,H-COSY correlation with carbon signal at 135.6 ppm, besides showing HMBCs with C-2'' and C-4'' at 144.6 and 127.9 ppm respectively. The methyl hydrogens of the pyrazole sub-structure appear as a singlet at 2.12 ppm and show HMBCs with the signals at 143.4 and 116.3 ppm assignable to C-3 and C-3b respectively. The mass spectrum of **4c** has a  $\text{M}^+$  peak at 498.1 in accord with the proposed structure. A single crystal X-ray crystallographic study of **4o** confirmed the structure deduced from NMR spectroscopic data (Figure 1).

## 2. Structural determination of **5r**

Methoxy protons of **5r** appear as a singlet at 3.83 ppm in  $^1\text{H}$ -NMR and the corresponding carbon appears at 55.4 ppm. This carbon signal shows a HMBC with C-4''. The pyrazole methyl hydrogens appear as a singlet at 1.99 ppm and show HMBCs with the signals at 146.1 and 105.6 ppm assignable to C-3 and C-3b respectively. H-4 appears as a triplet at 4.19 ppm, this multiplicity arises from coupling with the two diastereotopic 5-CH<sub>2</sub> hydrogens which occur as a multiplet. By a C,H-COSY correlation with the signal at 4.19 ppm, the C-4 is assigned to signal at 34.6 ppm. H-4 gives the HMBCs with C-3, C-3b and C-6 at 146.1, 105.6 and 165.1 respectively. Other HMBC correlations shown in Figure 2 support the structure **5r**.

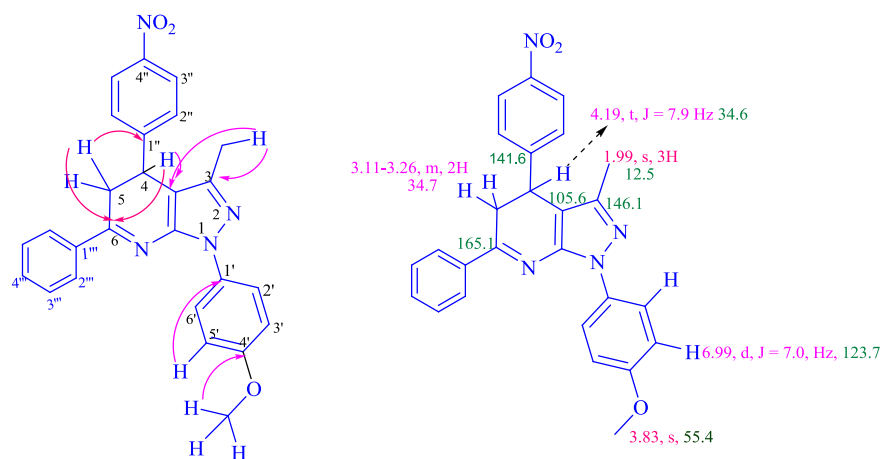

Figure 2. Selected  $^1\text{H}$  and  $^{13}\text{C}$  chemical shifts of **5r**

## 3. Structural determination of **4x**.

The pyrazole methyl hydrogens appear as a singlet at 2.13 ppm, which shows HMBCs with the signals at 143.4 and **116.3** ppm assignable to C-3 and C-3b respectively. Methoxy protons of anisole appear as a singlet at 3.77 ppm and the corresponding carbon occurs at 55.1 ppm, assigned by C,H-COSY spectrum. The signals assigned and the HMBC correlations support the structure and stereochemistry of **4x**.

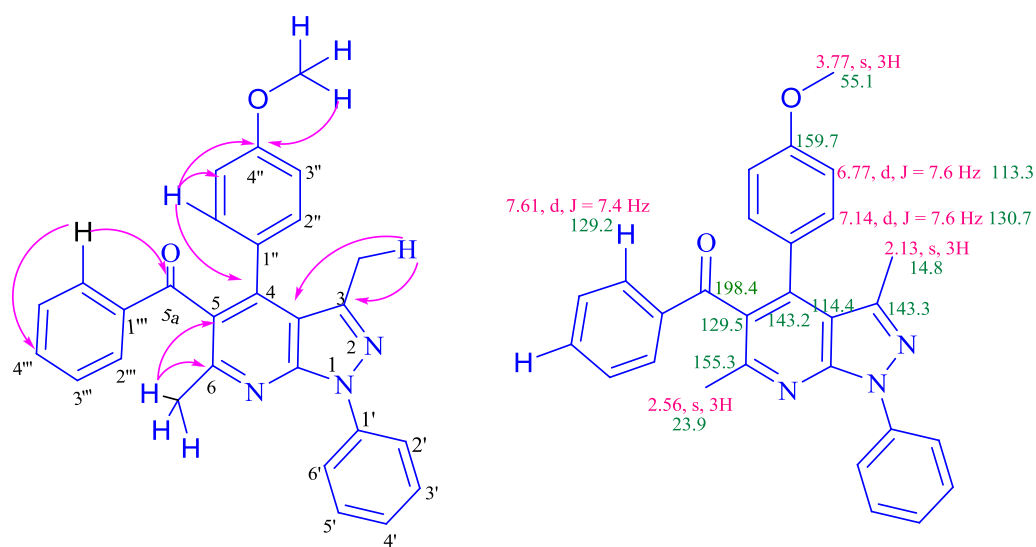

Figure 3. Selected <sup>1</sup>H and <sup>13</sup>C chemical shifts of **4x**

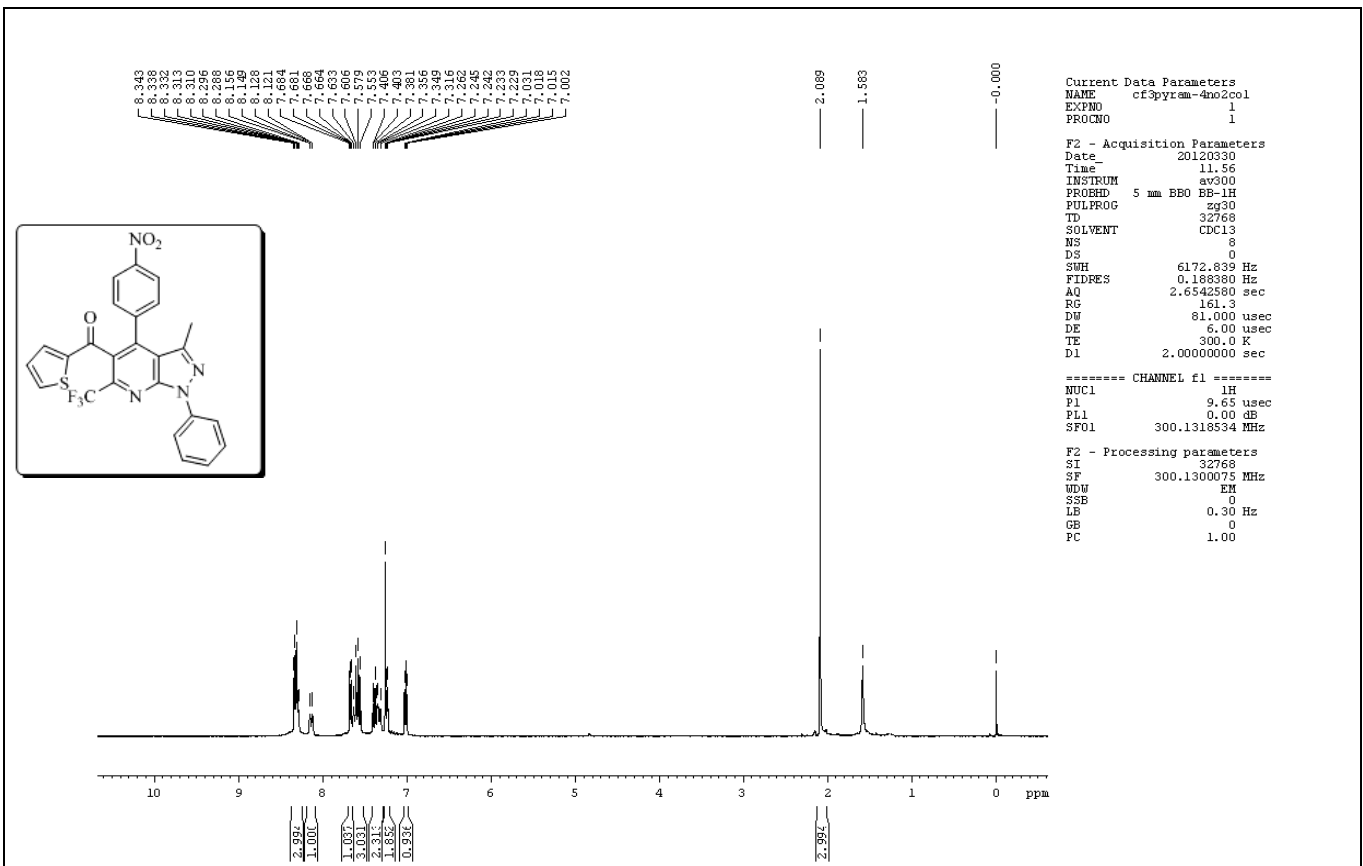

Figure 1. <sup>1</sup>H NMR spectrum of 4b

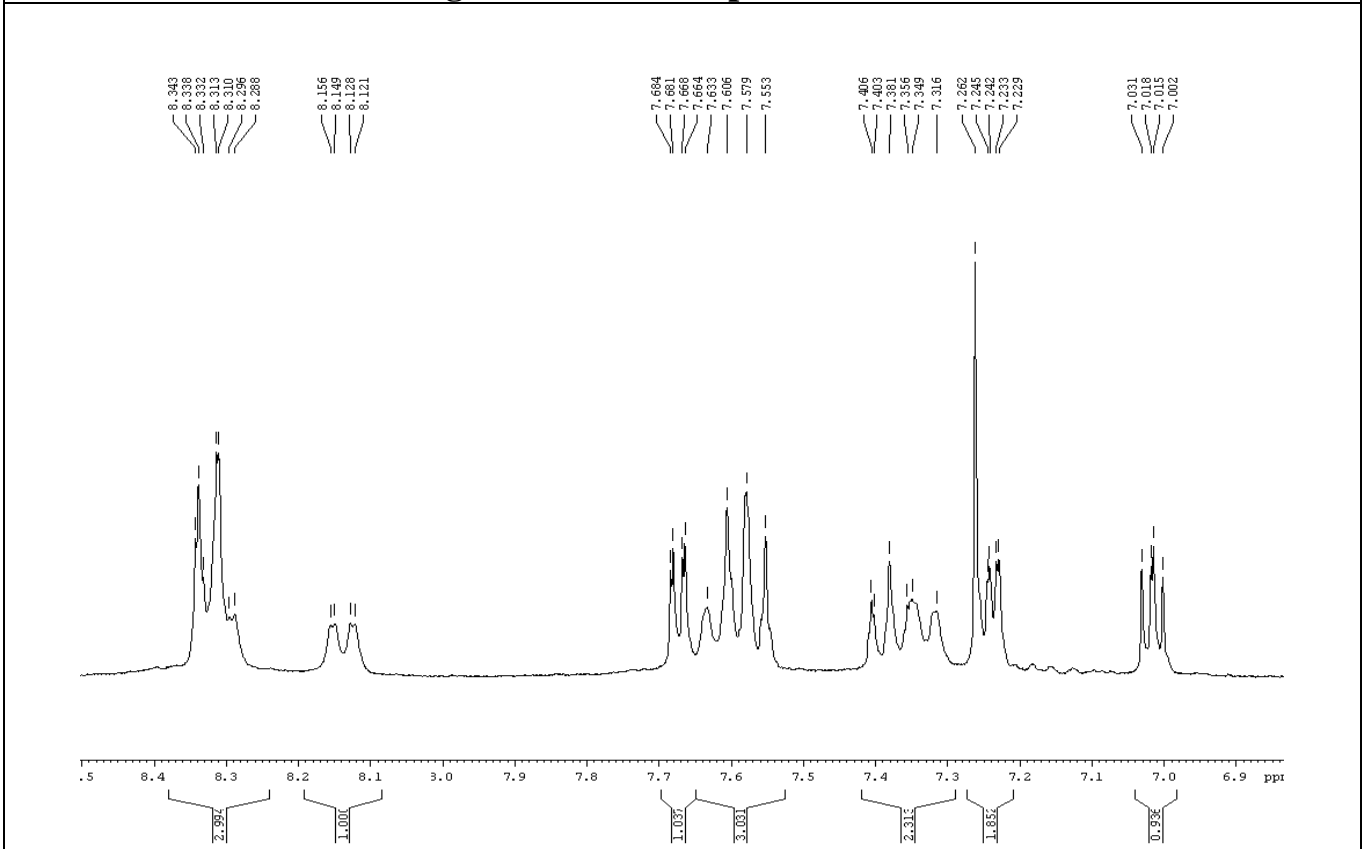

Figure 2. <sup>1</sup>H NMR spectrum of 4b-expansion

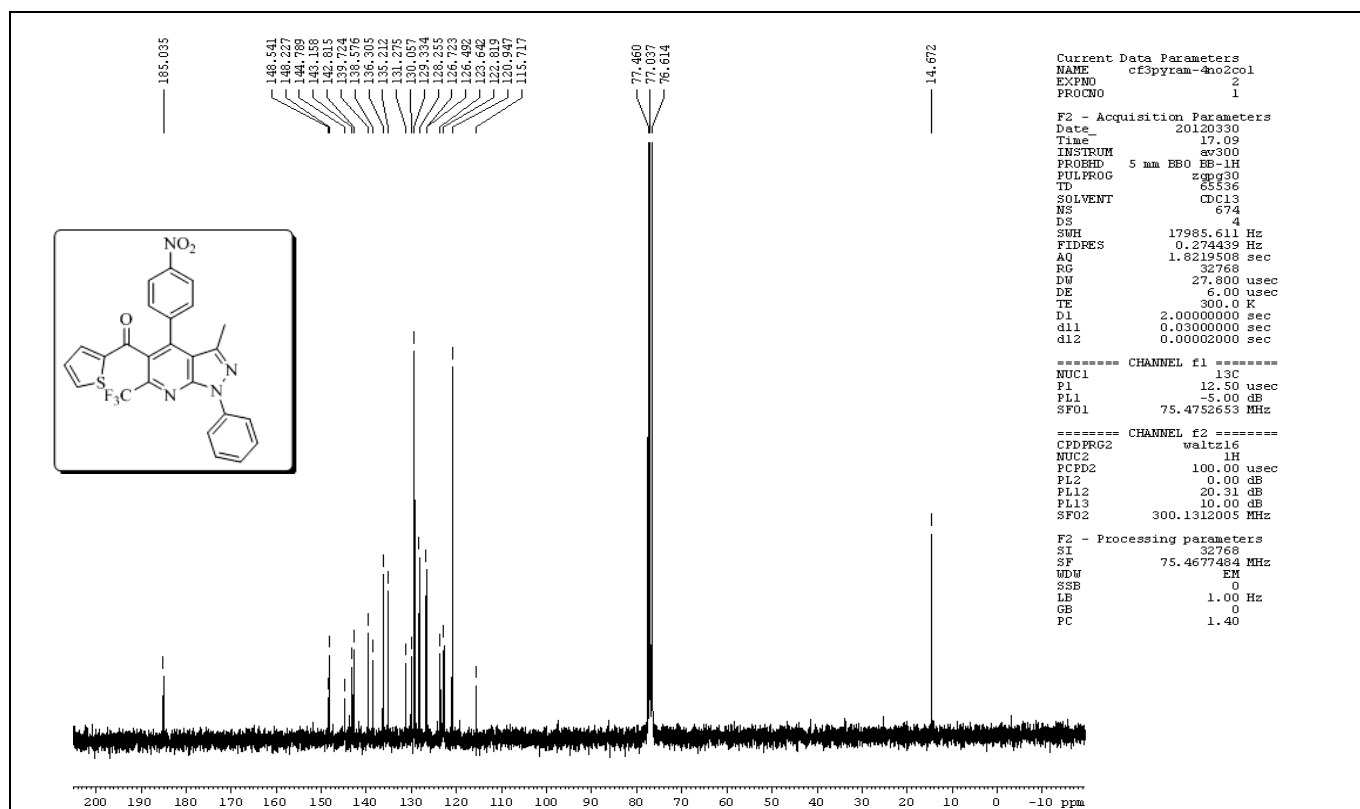

Figure 3.  $^{13}\text{C}$  NMR spectrum of 4b

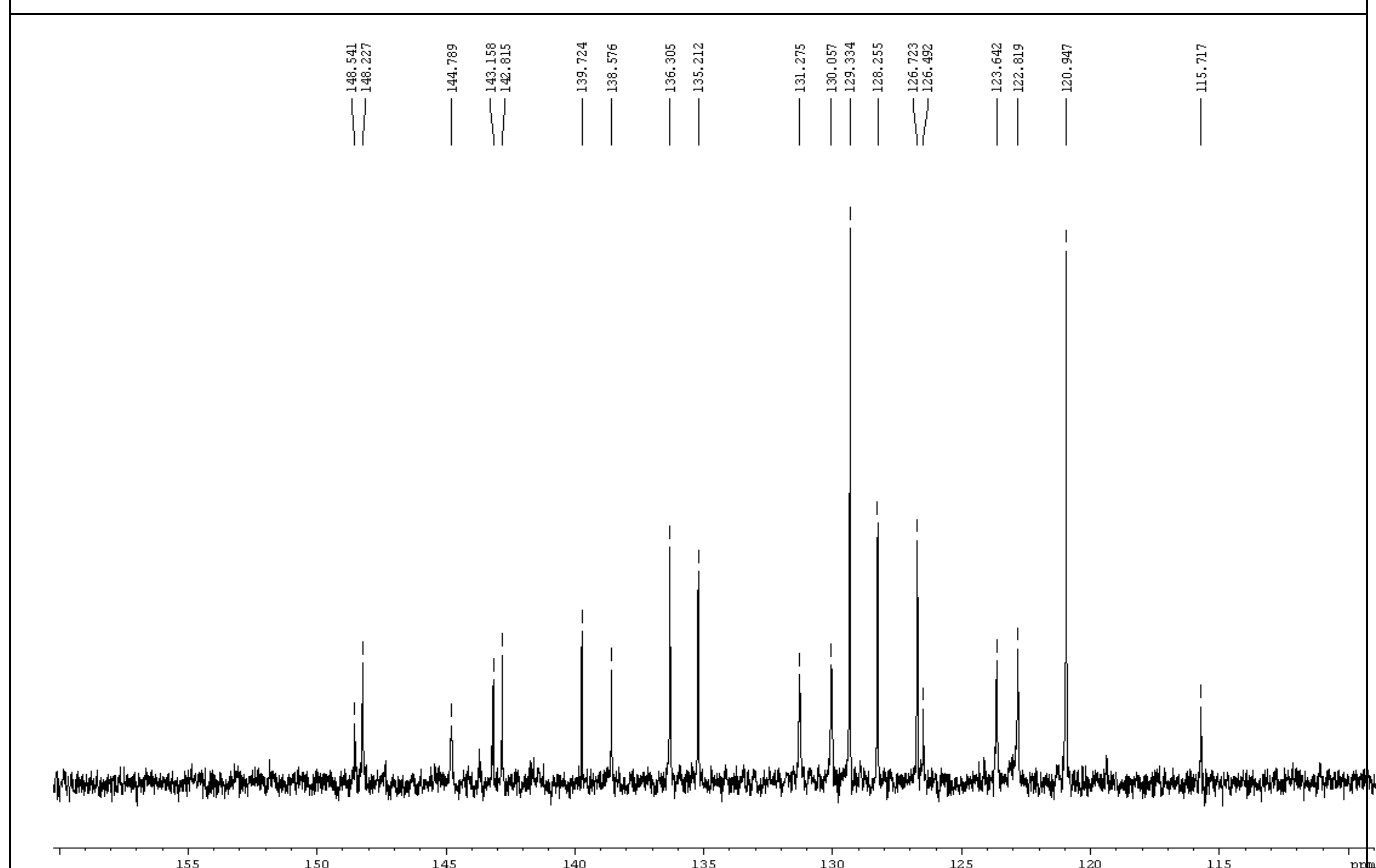

Figure 4.  $^{13}\text{C}$  NMR spectrum of 4b-expansion

Q9\_121026172426 #33 RT: 0.56 AV: 1 NL: 1.10E3  
T: ITMS + c ESI Full ms [100.00-1000.00]

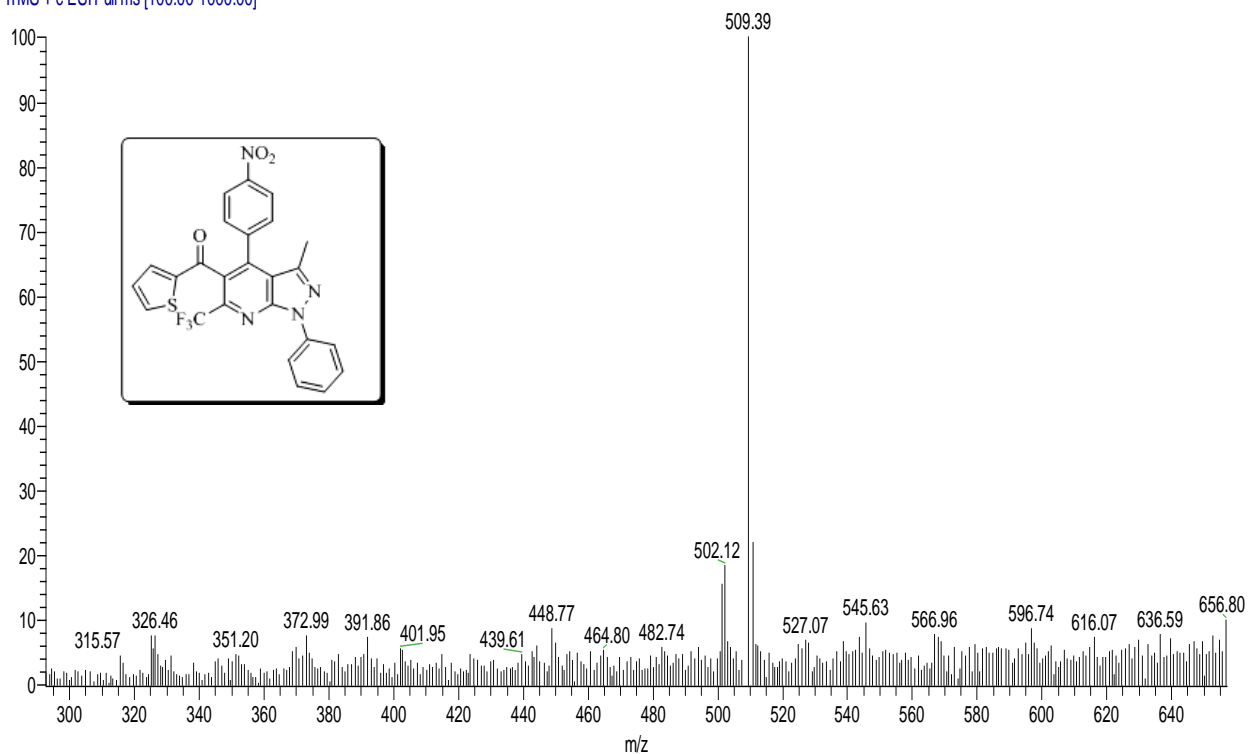

Figure 5. Mass spectrum of 4b

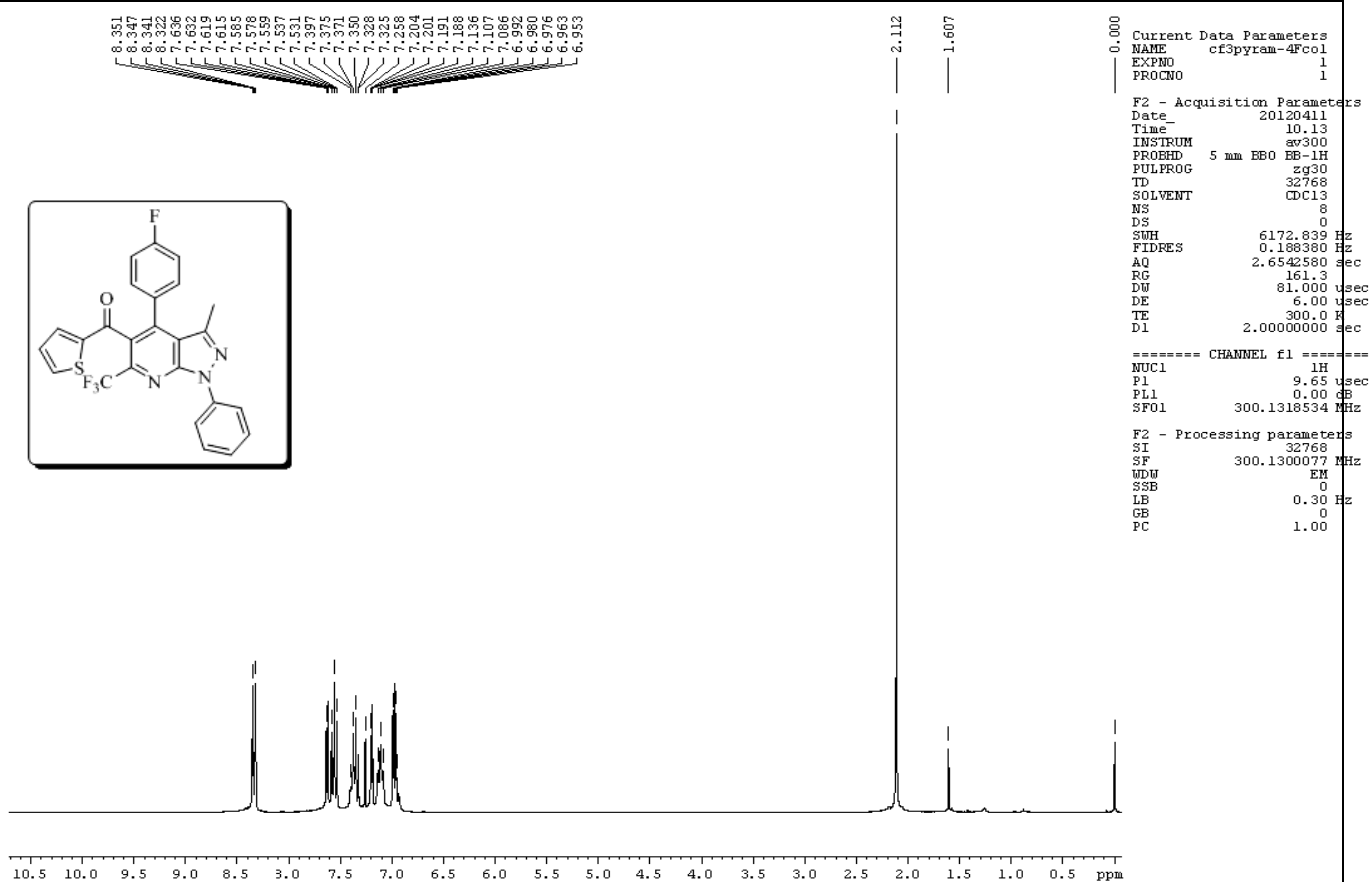

Figure 6. <sup>1</sup>H NMR spectrum of 4c

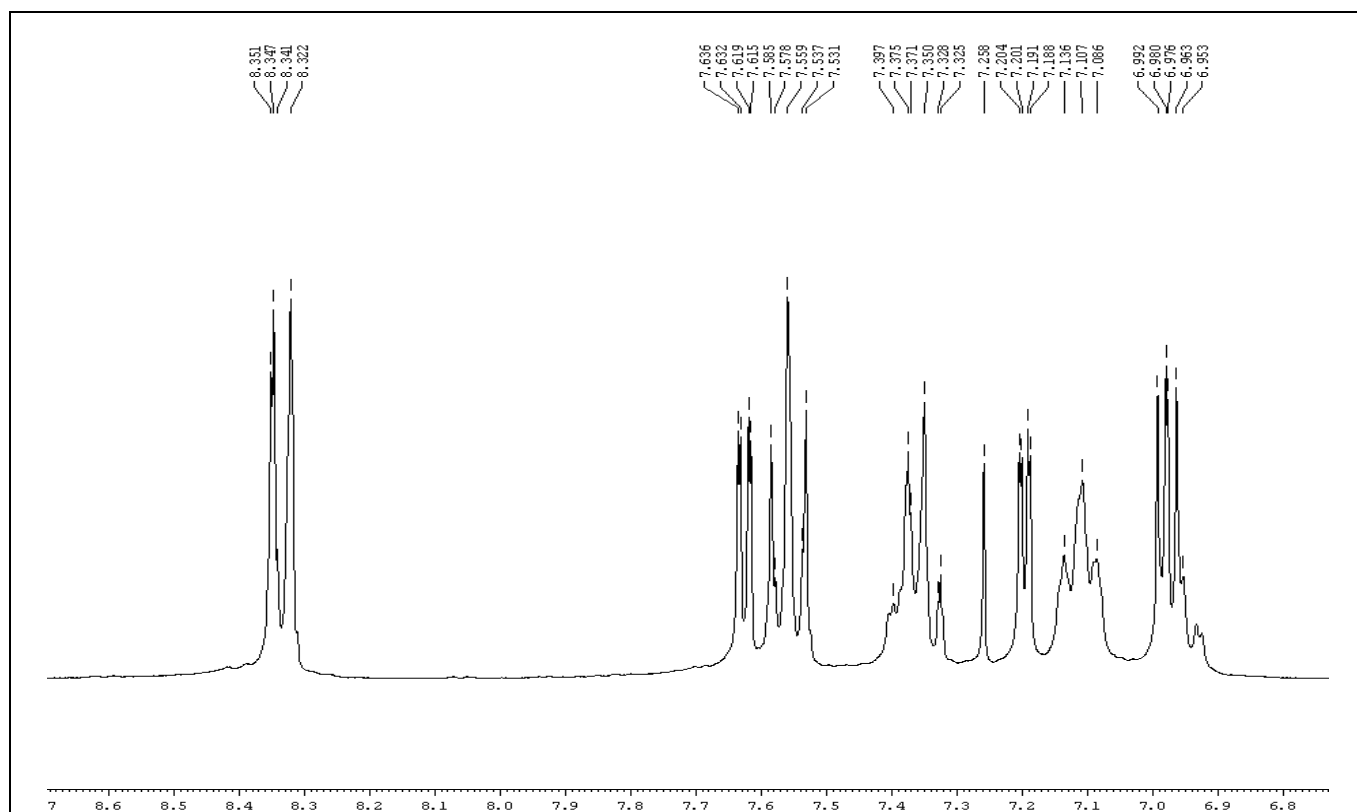

Figure 7.  $^1\text{H}$  NMR spectrum of 4c-expansion

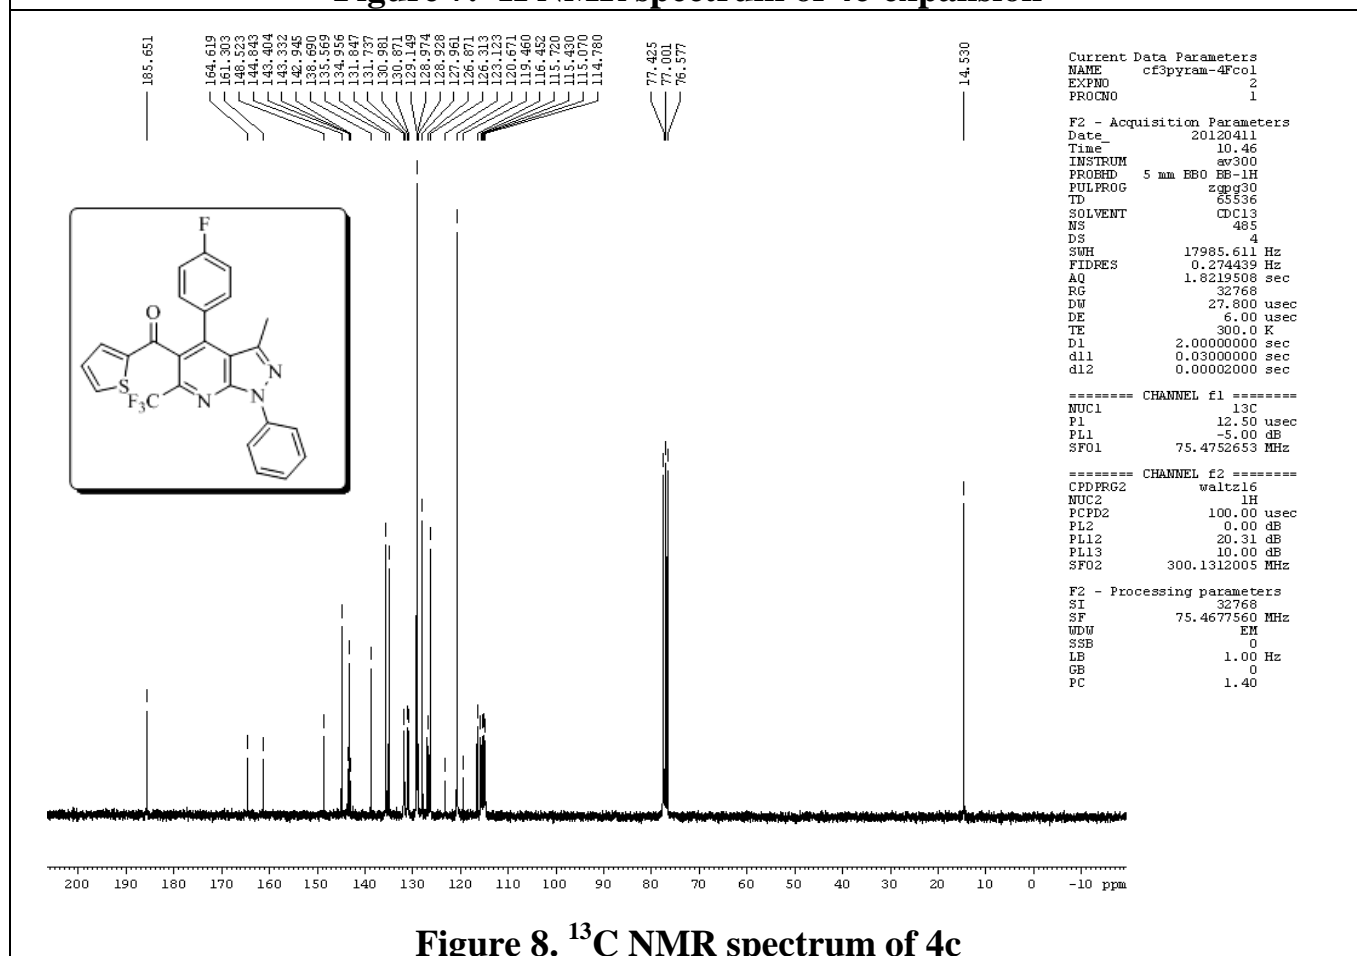

Figure 8.  $^{13}\text{C}$  NMR spectrum of 4c



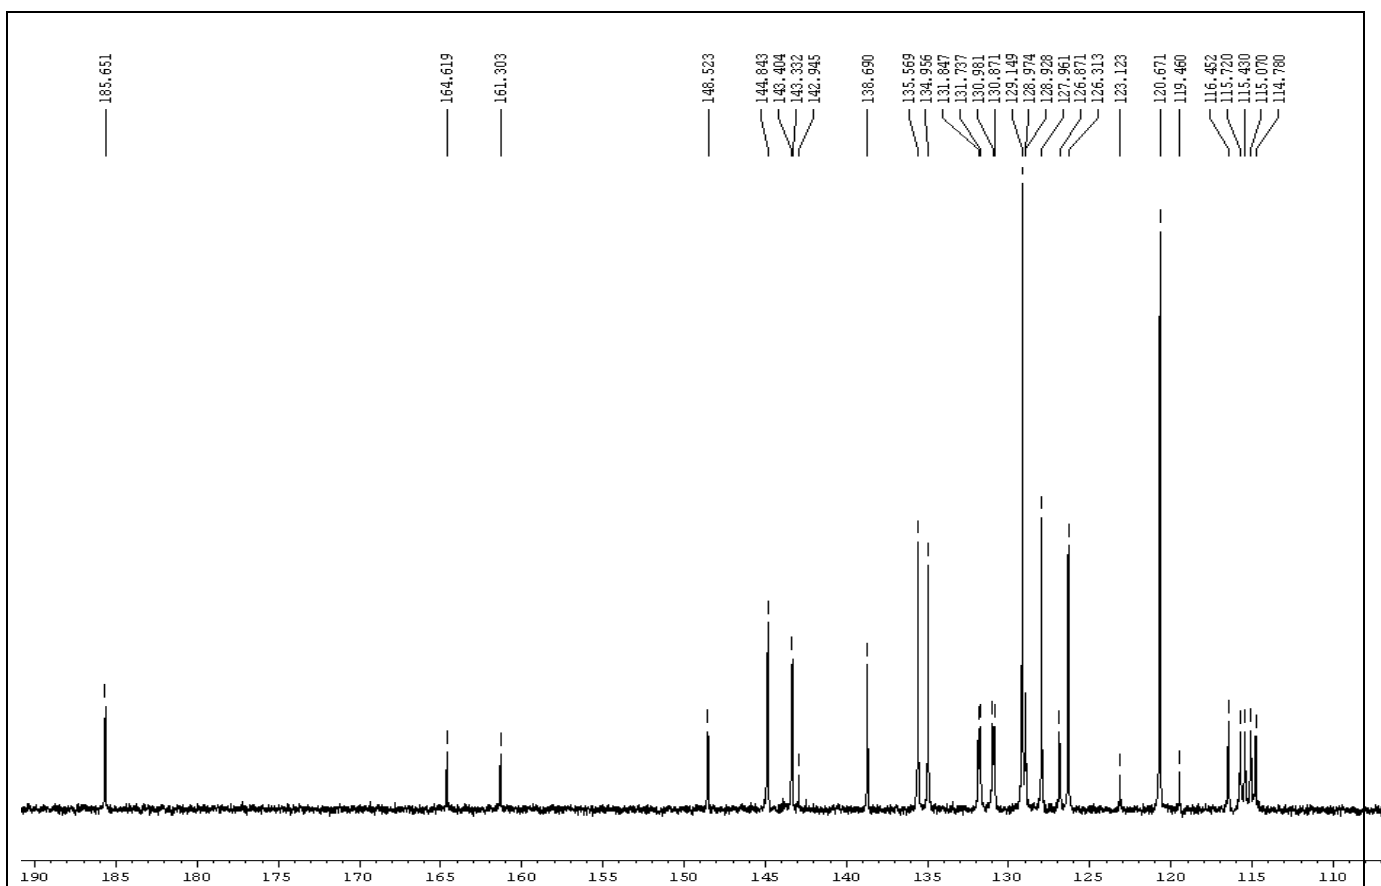

**Figure 9.  $^{13}\text{C}$  NMR spectrum of 4c-expansion**

Q2\_121026172426 #42 RT: 0.72 AV: 1 NL: 1.13E4  
T: ITMS + c ESI Full ms [100.00-1000.00]

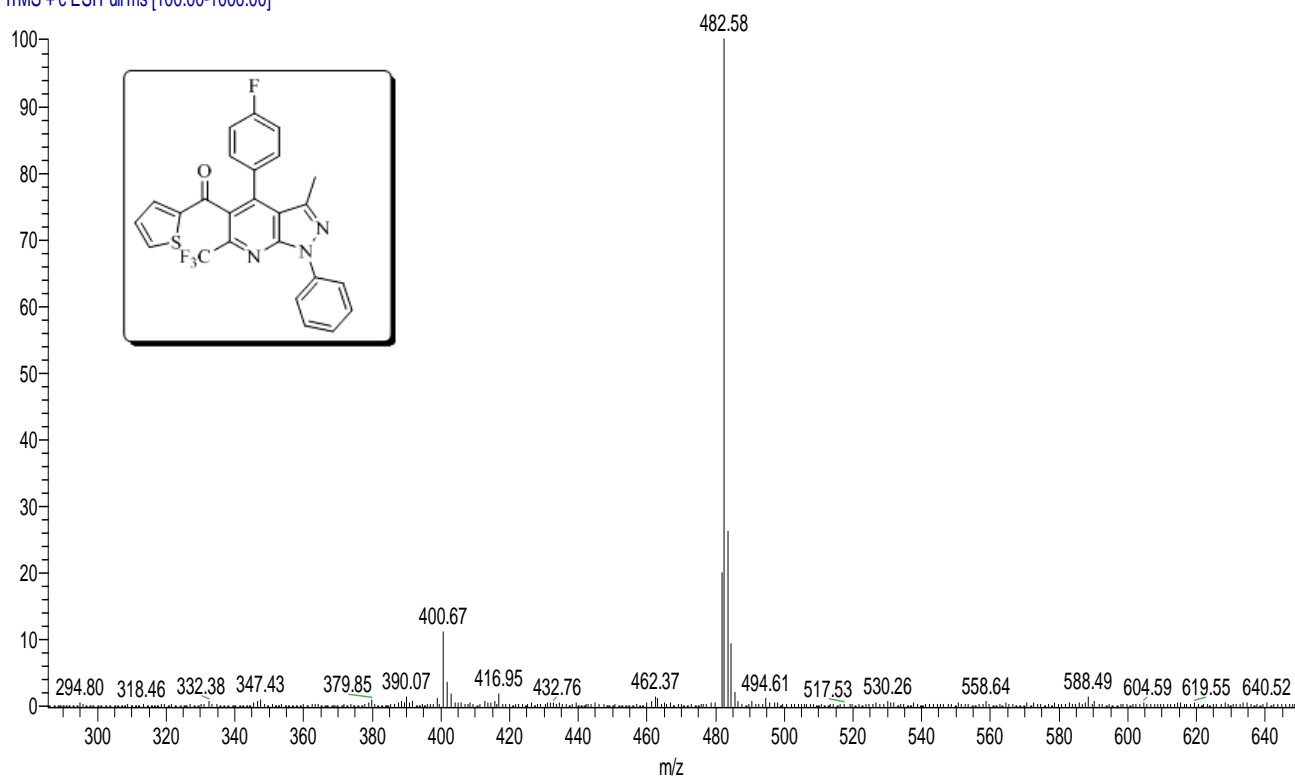

**Figure 10. Mass spectrum of 4c**

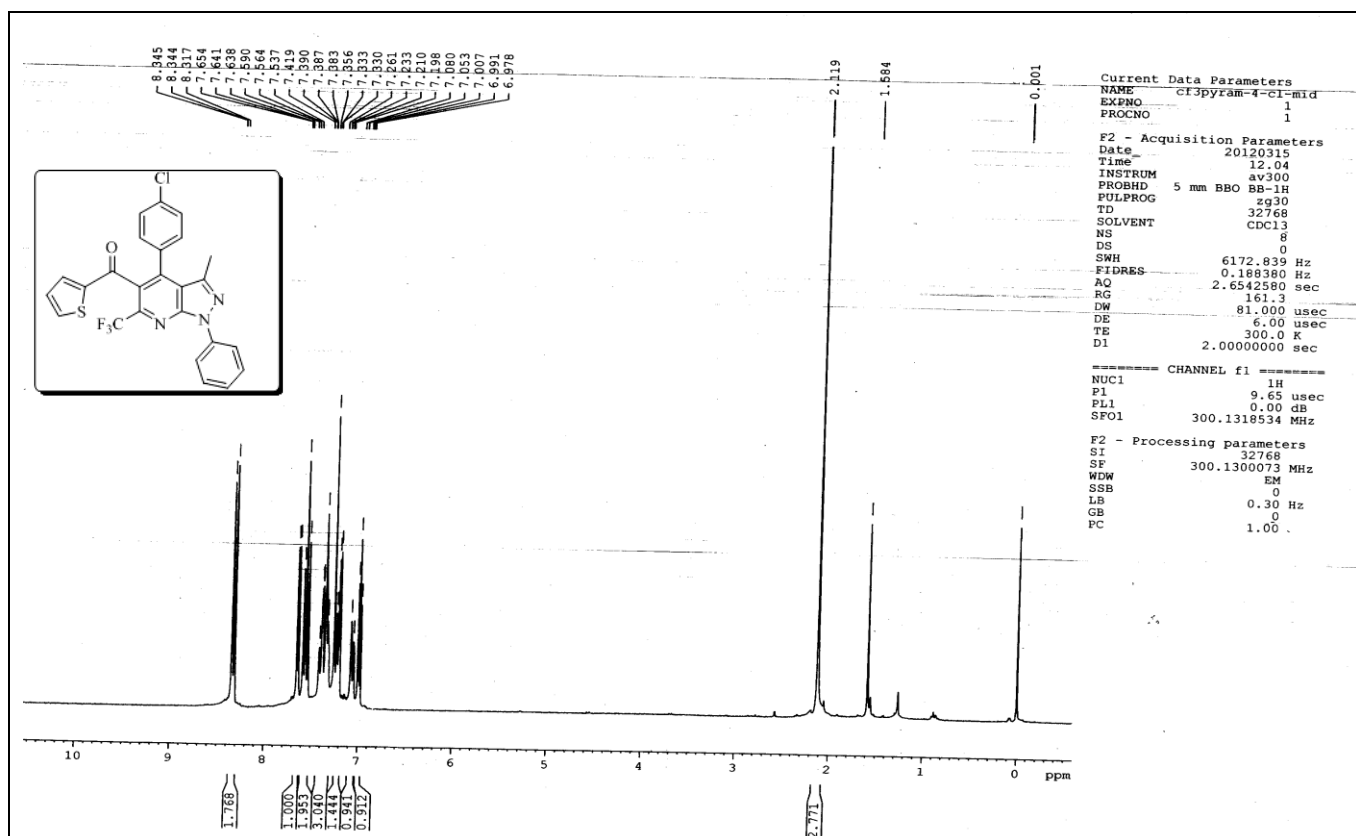

Figure 11.  $^1\text{H}$  NMR spectrum of 4a

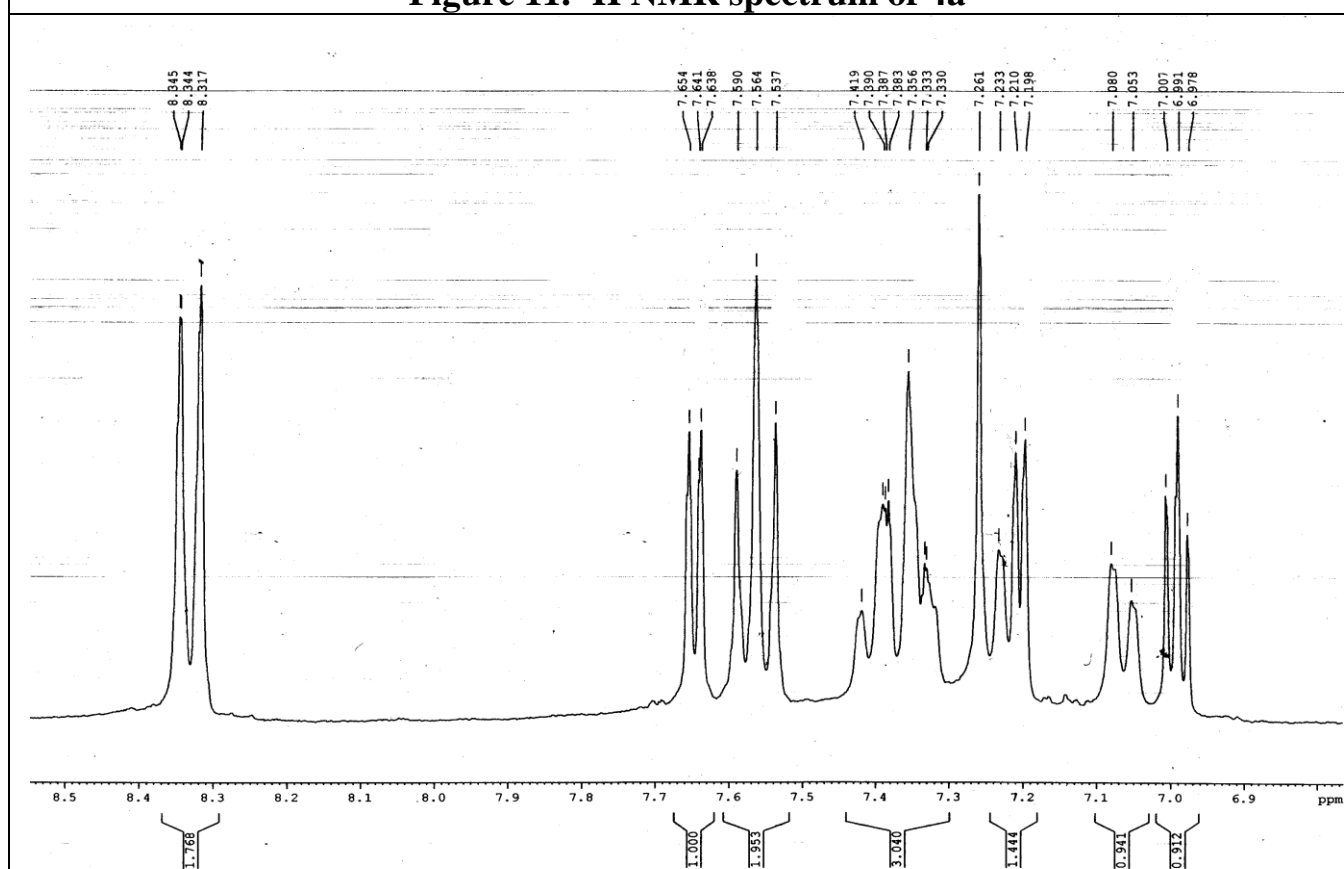

Figure 12.  $^1\text{H}$  NMR spectrum of 4a-expansion

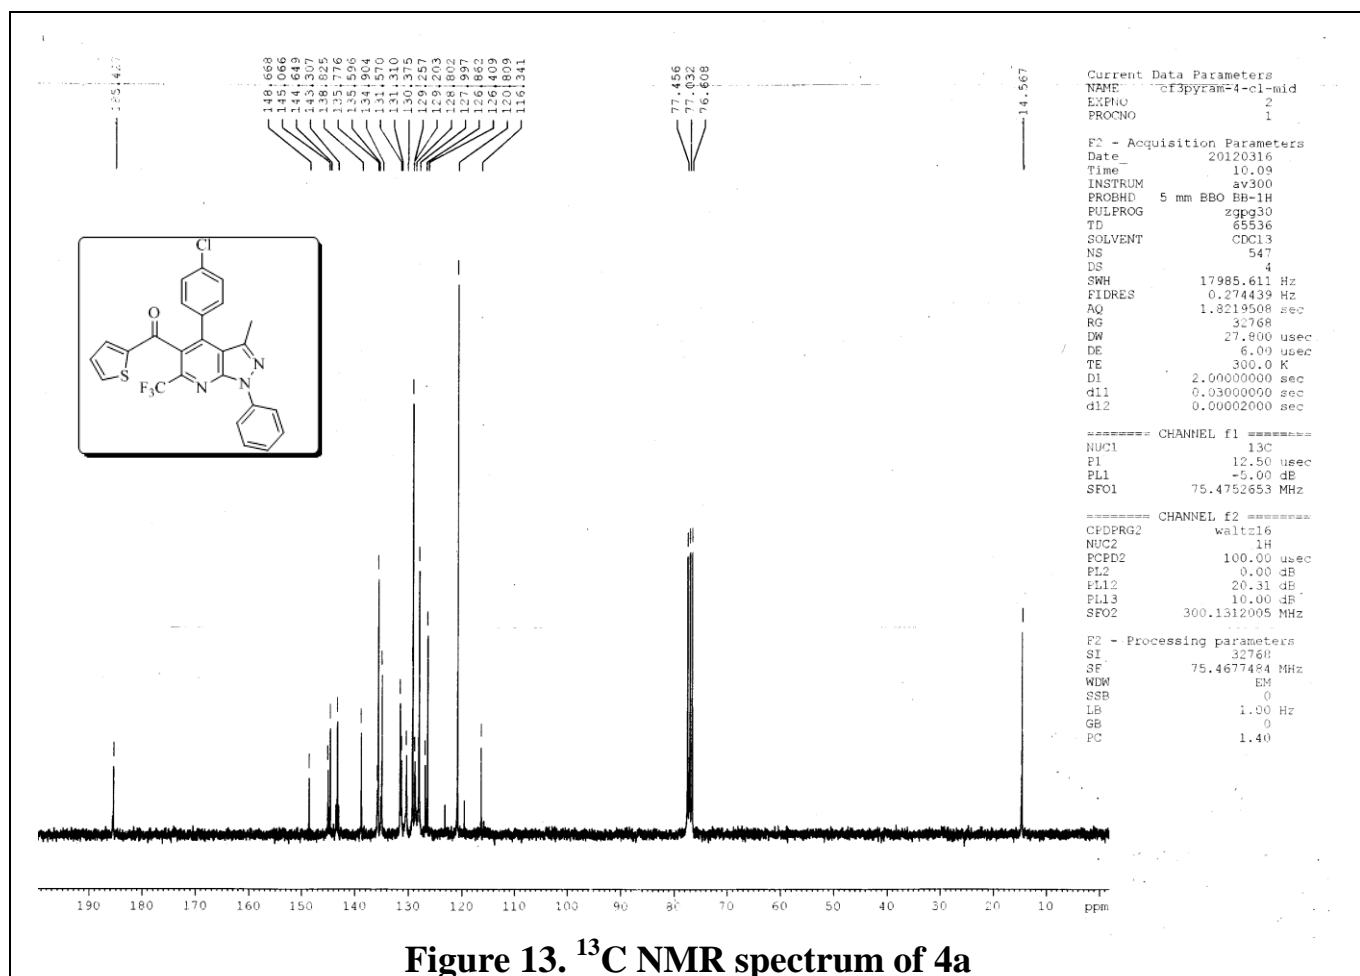

Figure 13.  $^{13}\text{C}$  NMR spectrum of 4a

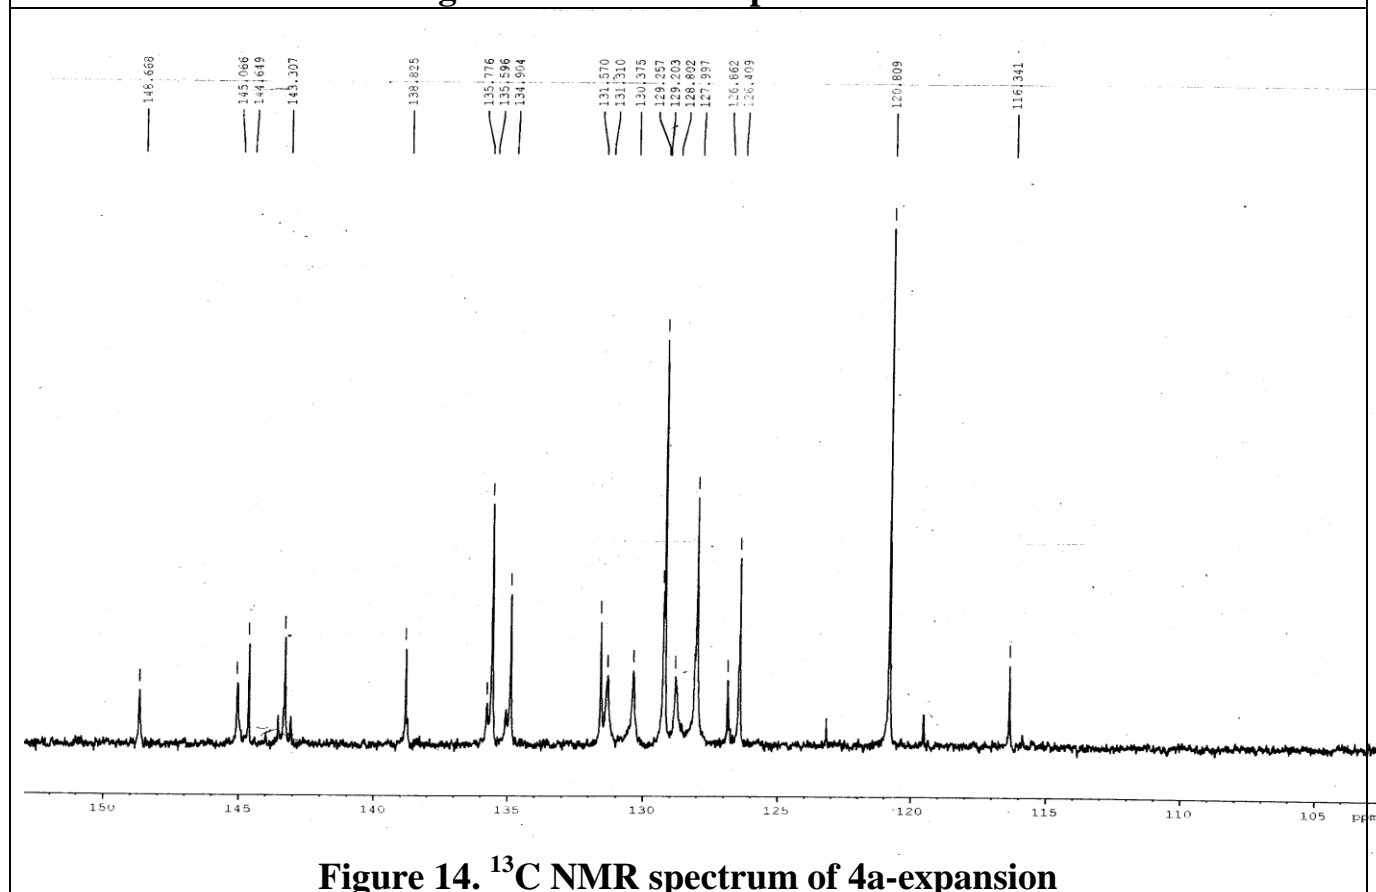

Figure 14.  $^{13}\text{C}$  NMR spectrum of 4a-expansion

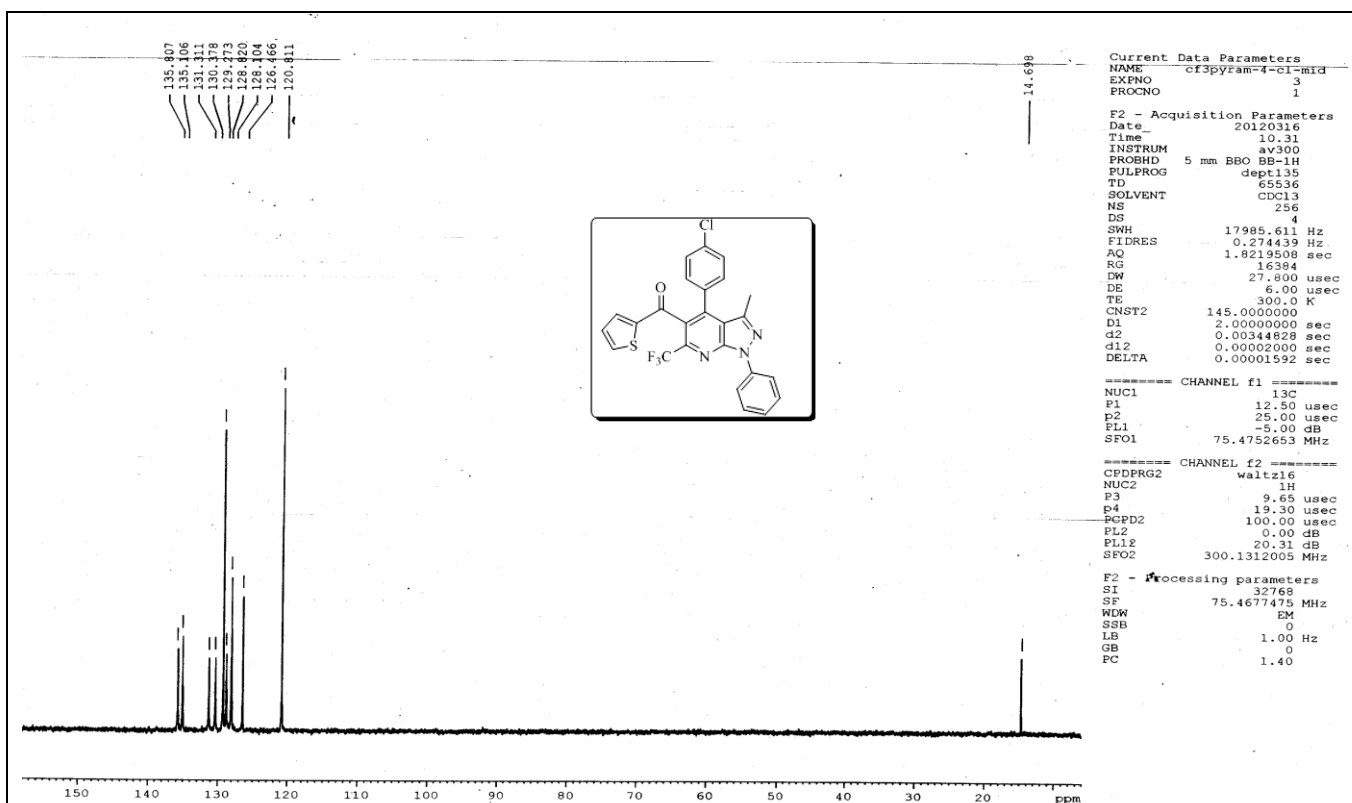

Figure 15. Dept-135 spectrum of 4a

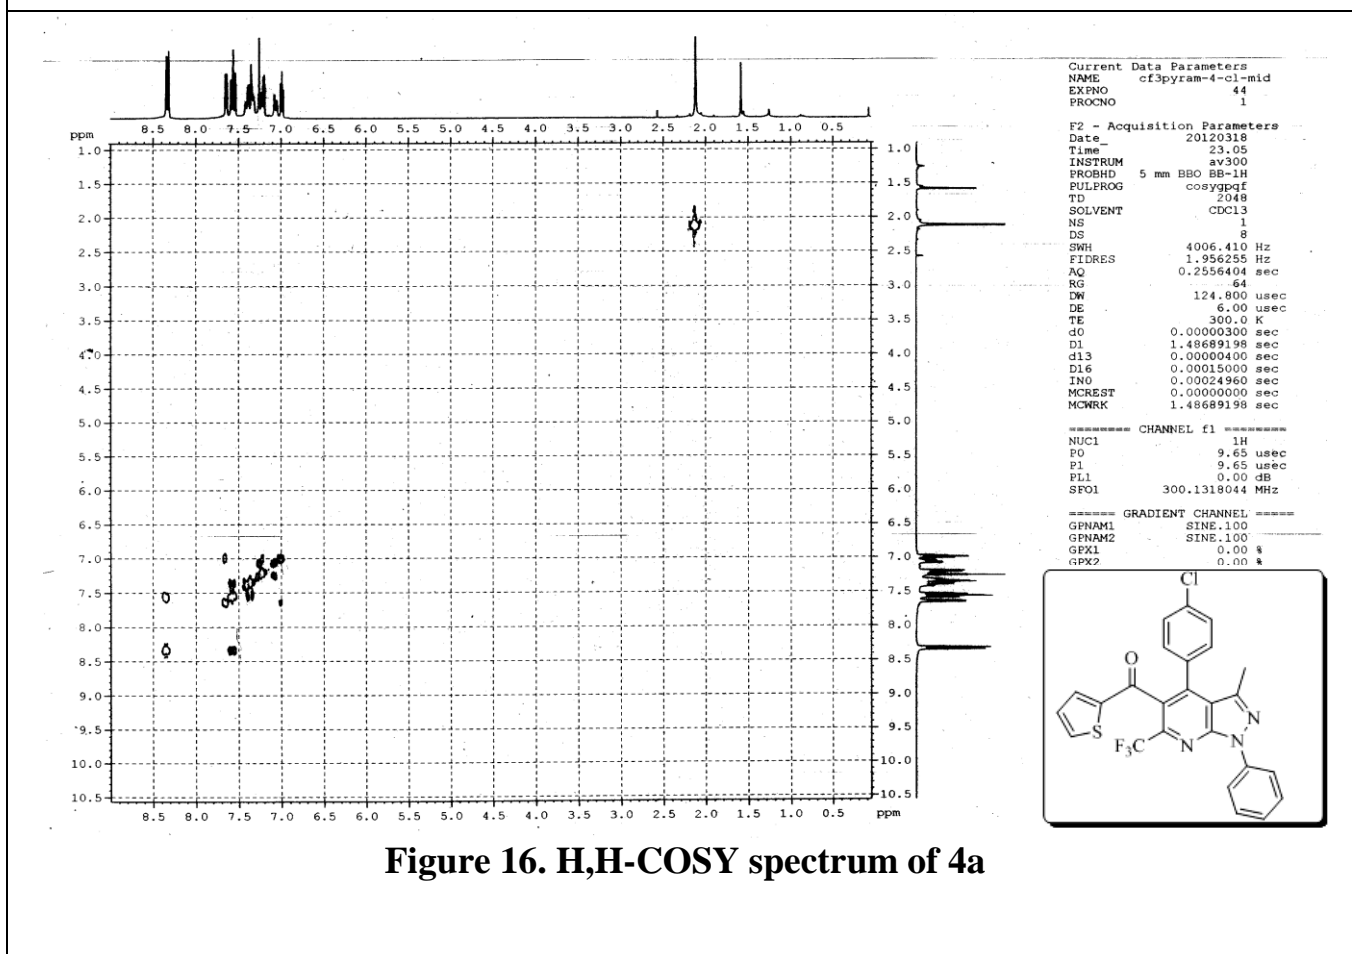

Figure 16. H,H-COSY spectrum of 4a

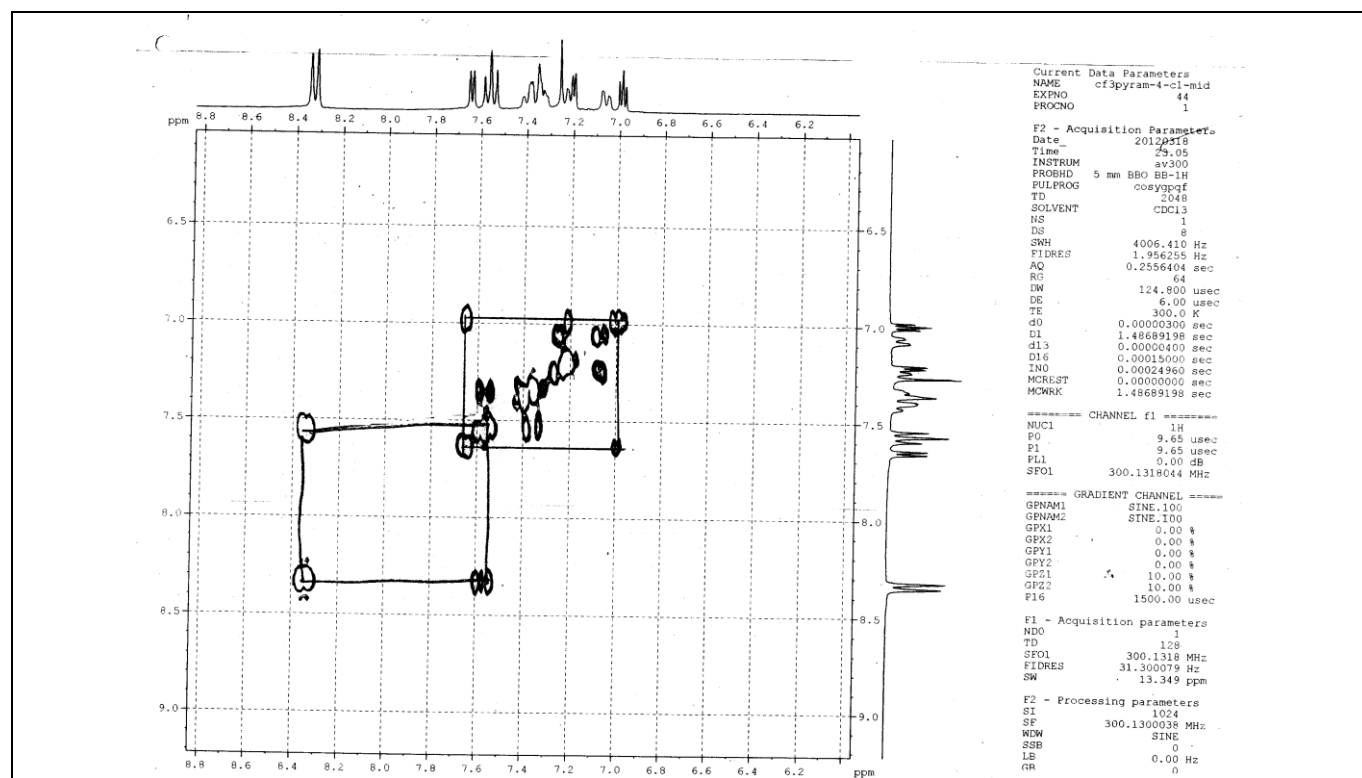

Figure 17. H,H-COSY spectrum of 4a-expansion

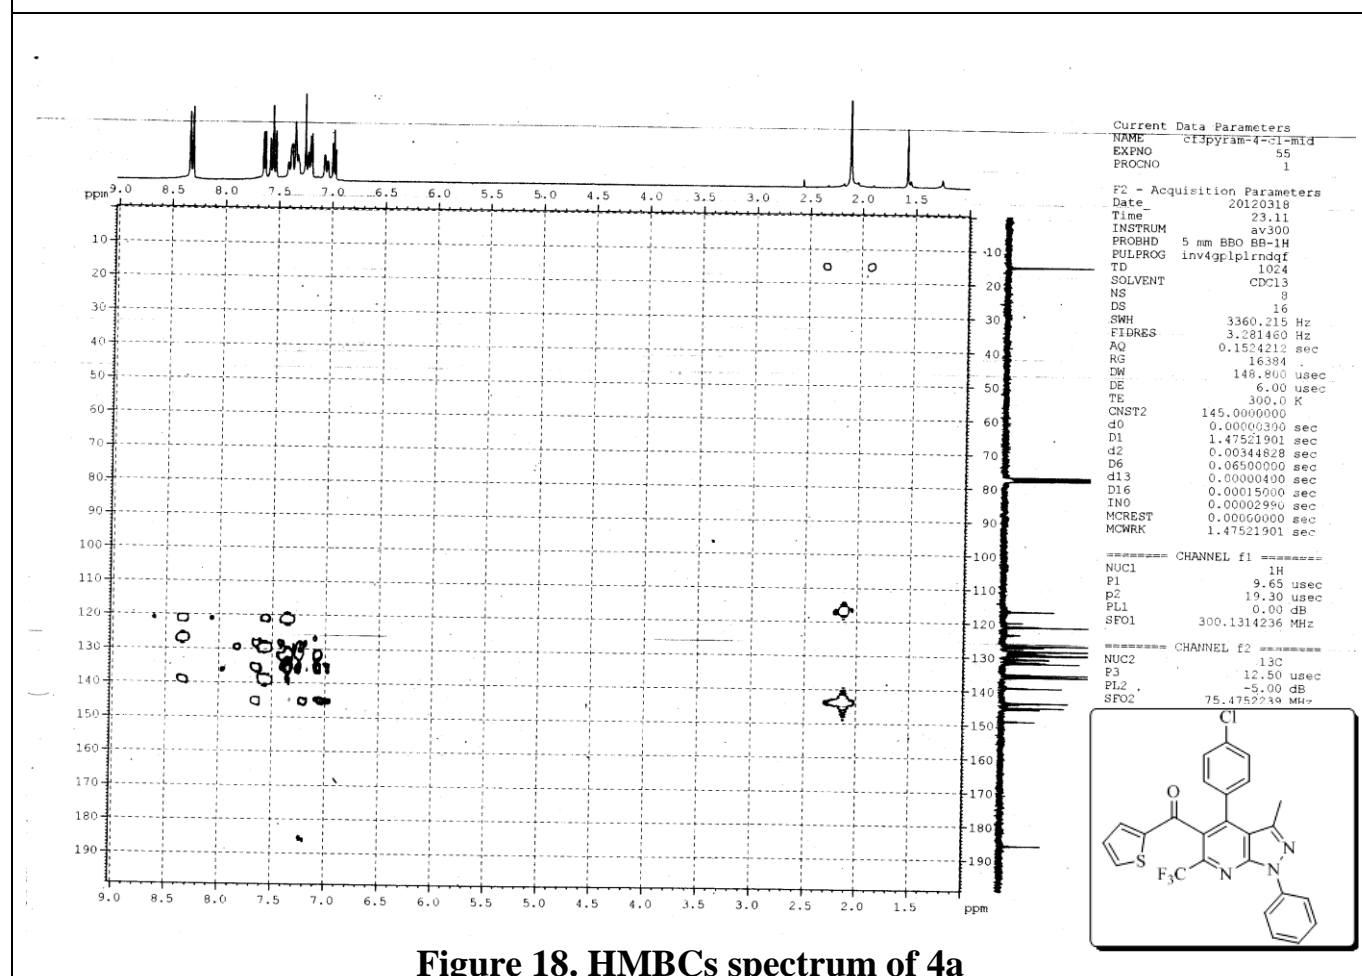

Figure 18. HMBCs spectrum of 4a

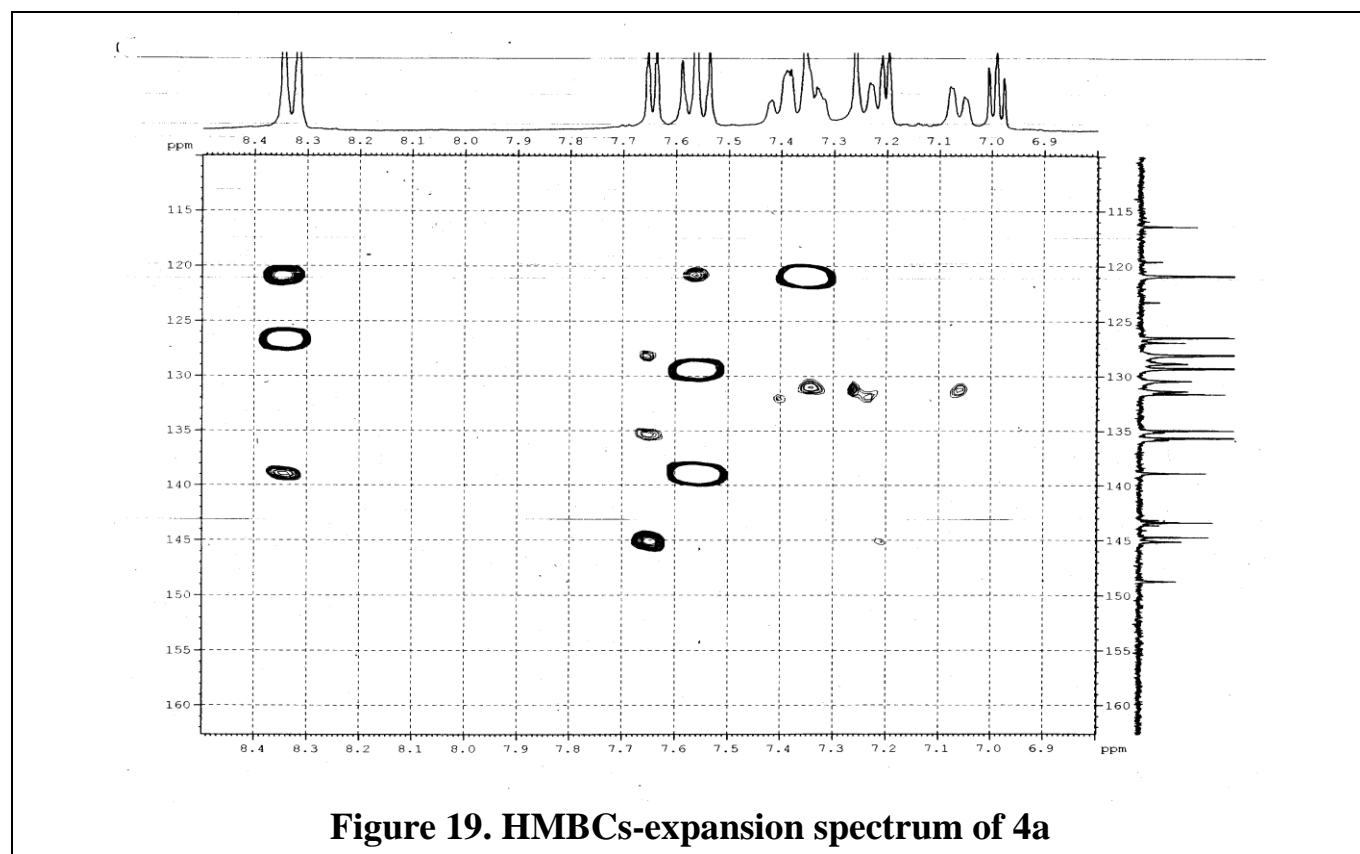

Figure 19. HMBCs-expansion spectrum of 4a

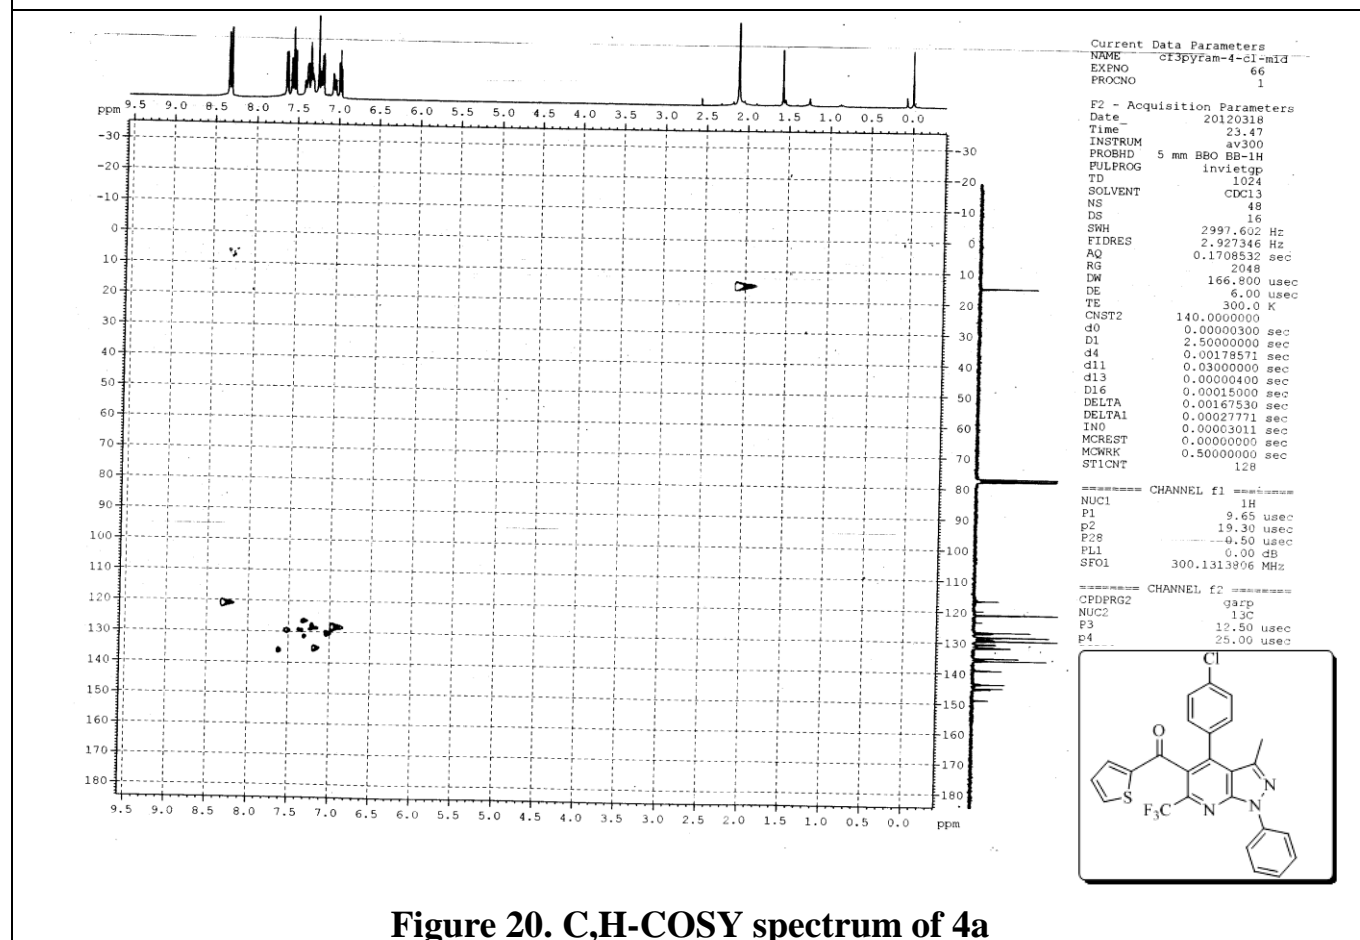

Figure 20. C,H-COSY spectrum of 4a

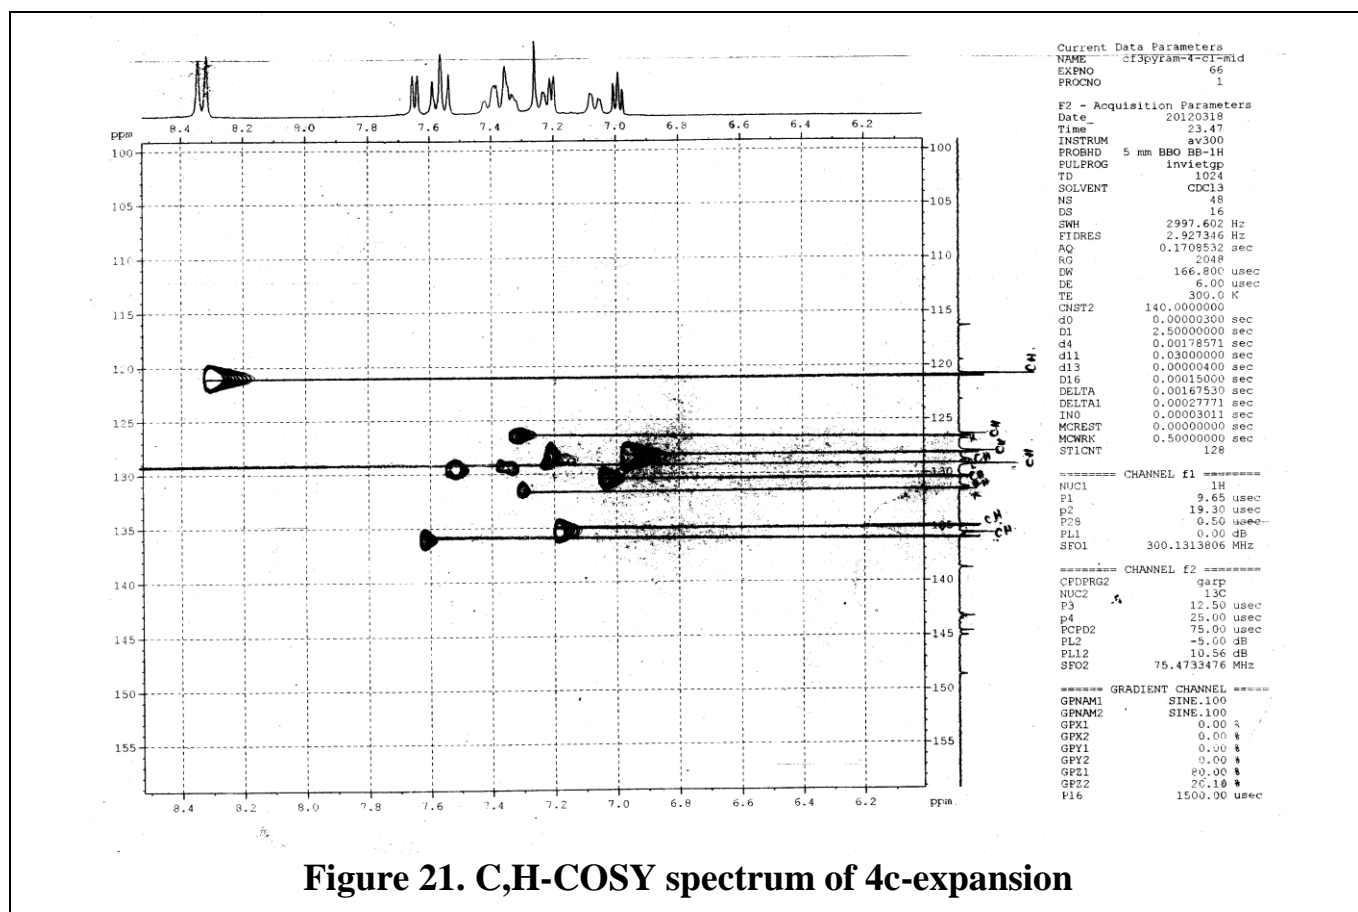

Figure 21. C,H-COSY spectrum of 4c-expansion

CF3-4CT-MID\_120403123010 #78 RT: 0.18 AV: 1 NL: 3.06E4  
T: ITMS + c ESI Full ms [150.00-700.00]

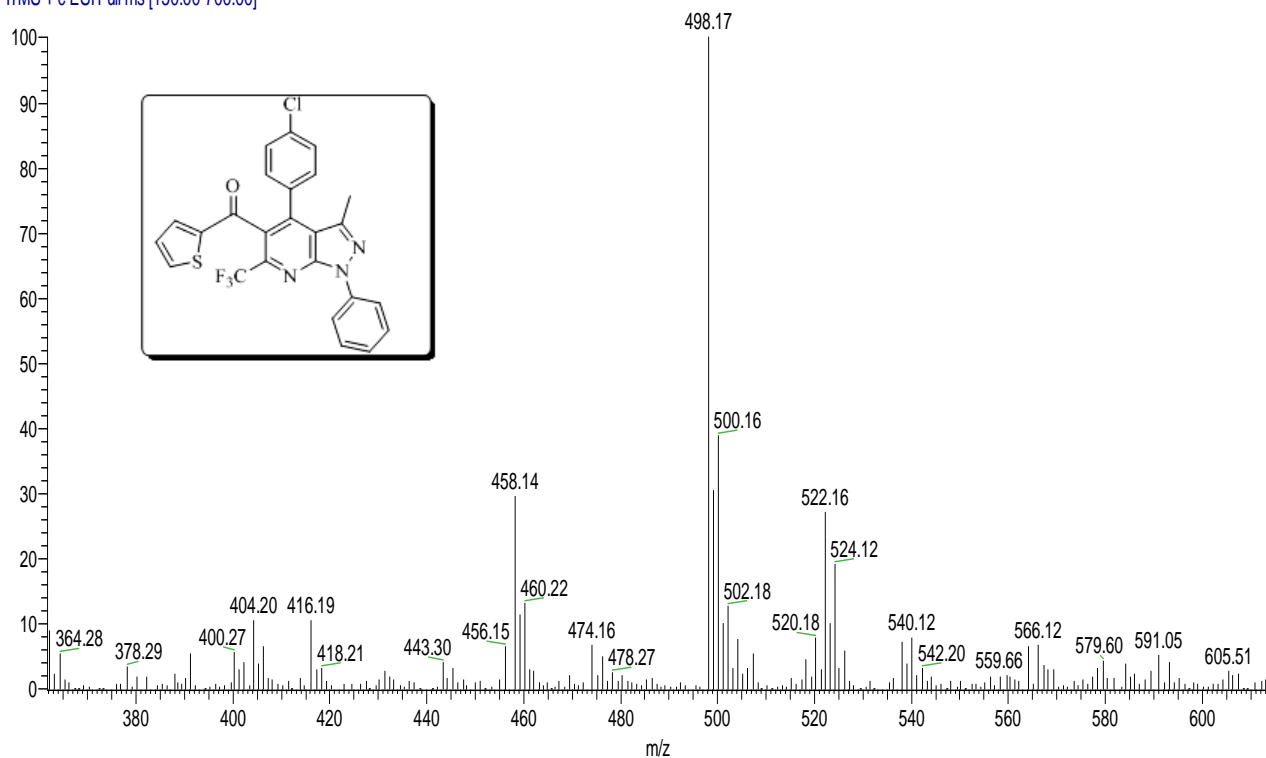

Figure 22. Mass spectrum of 4c



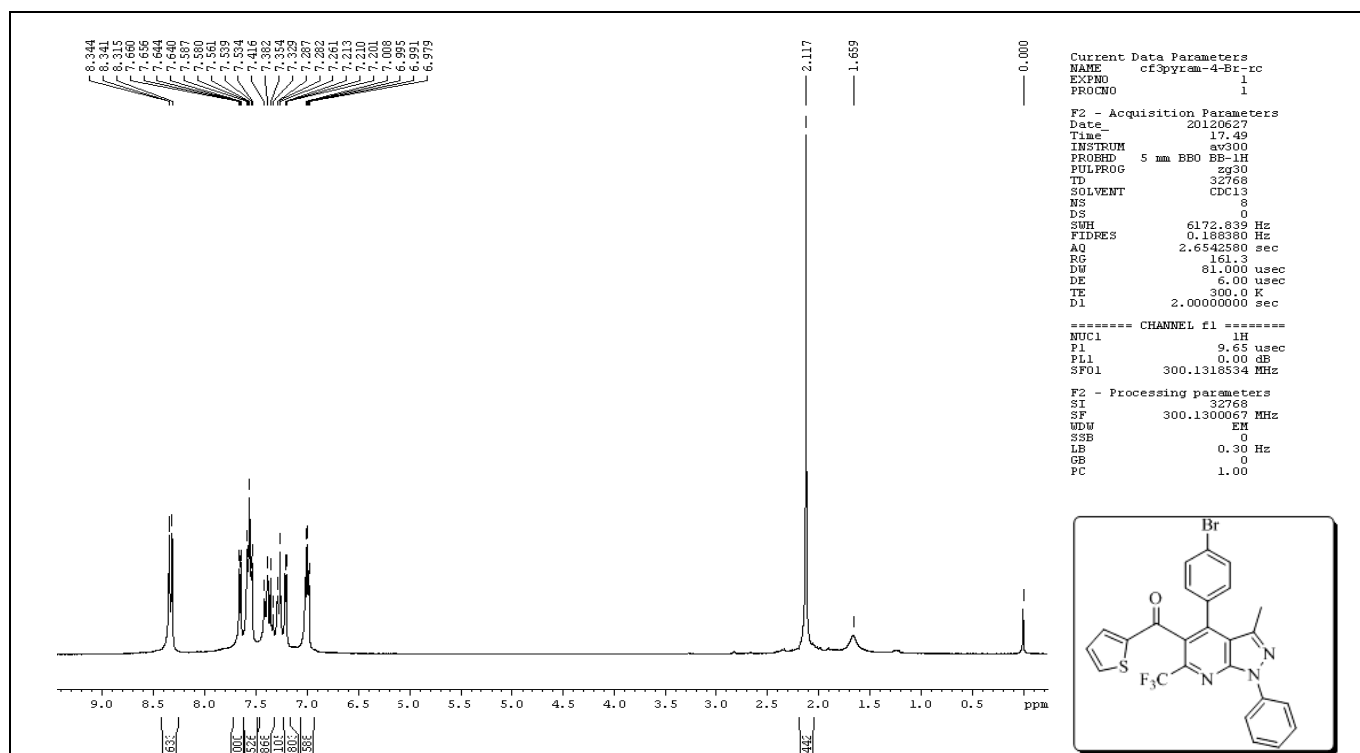

Figure 23. <sup>1</sup>H NMR spectrum of 4d

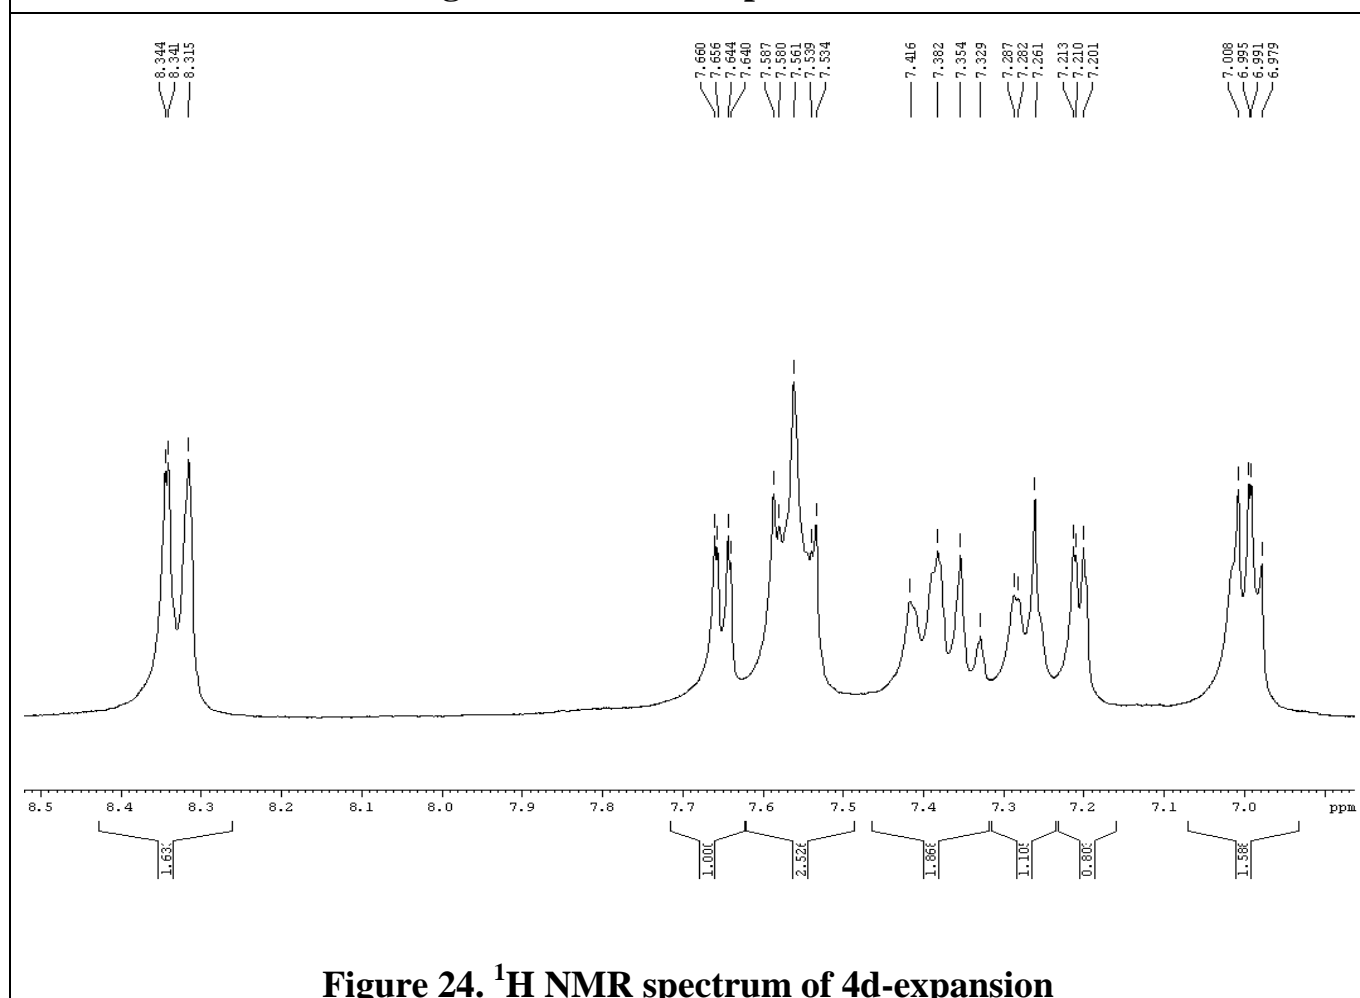

Figure 24. <sup>1</sup>H NMR spectrum of 4d-expansion



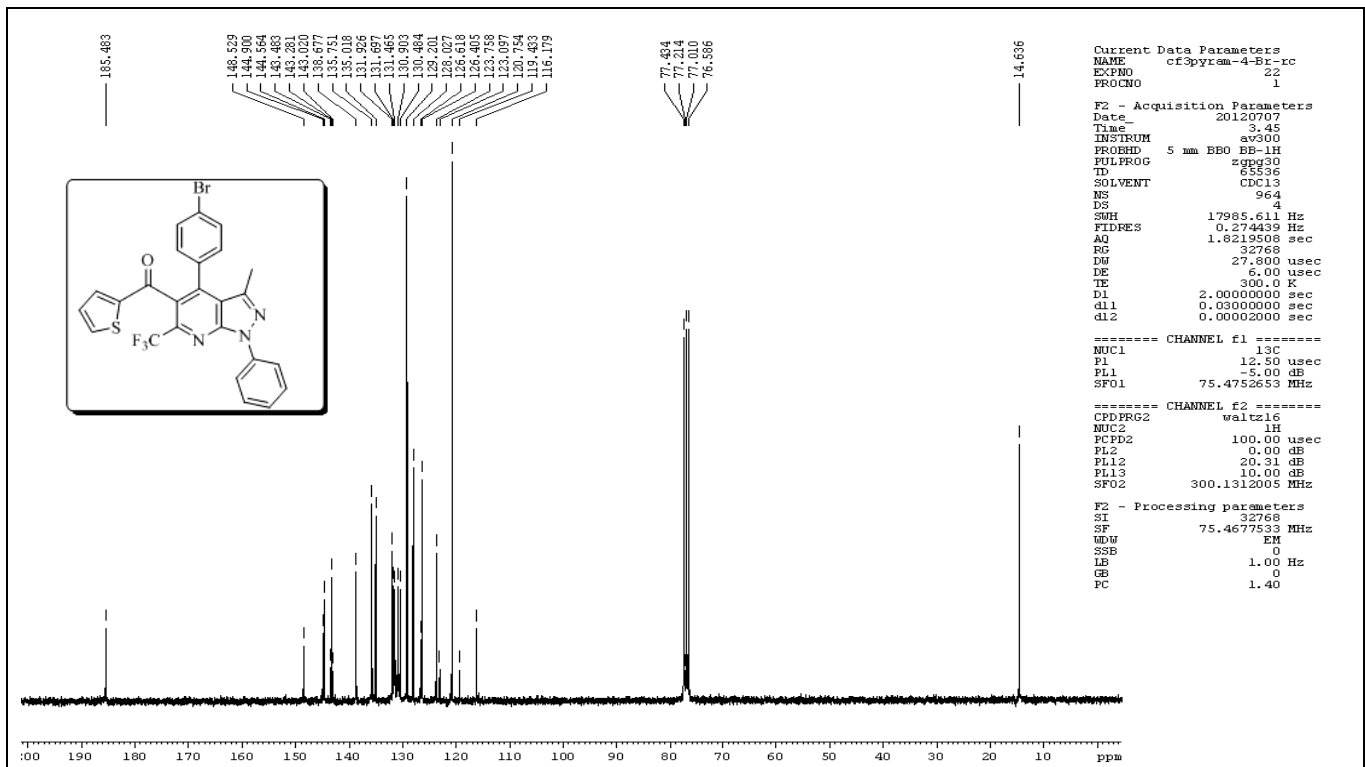

Figure 25.  $^{13}\text{C}$  NMR spectrum of 4d

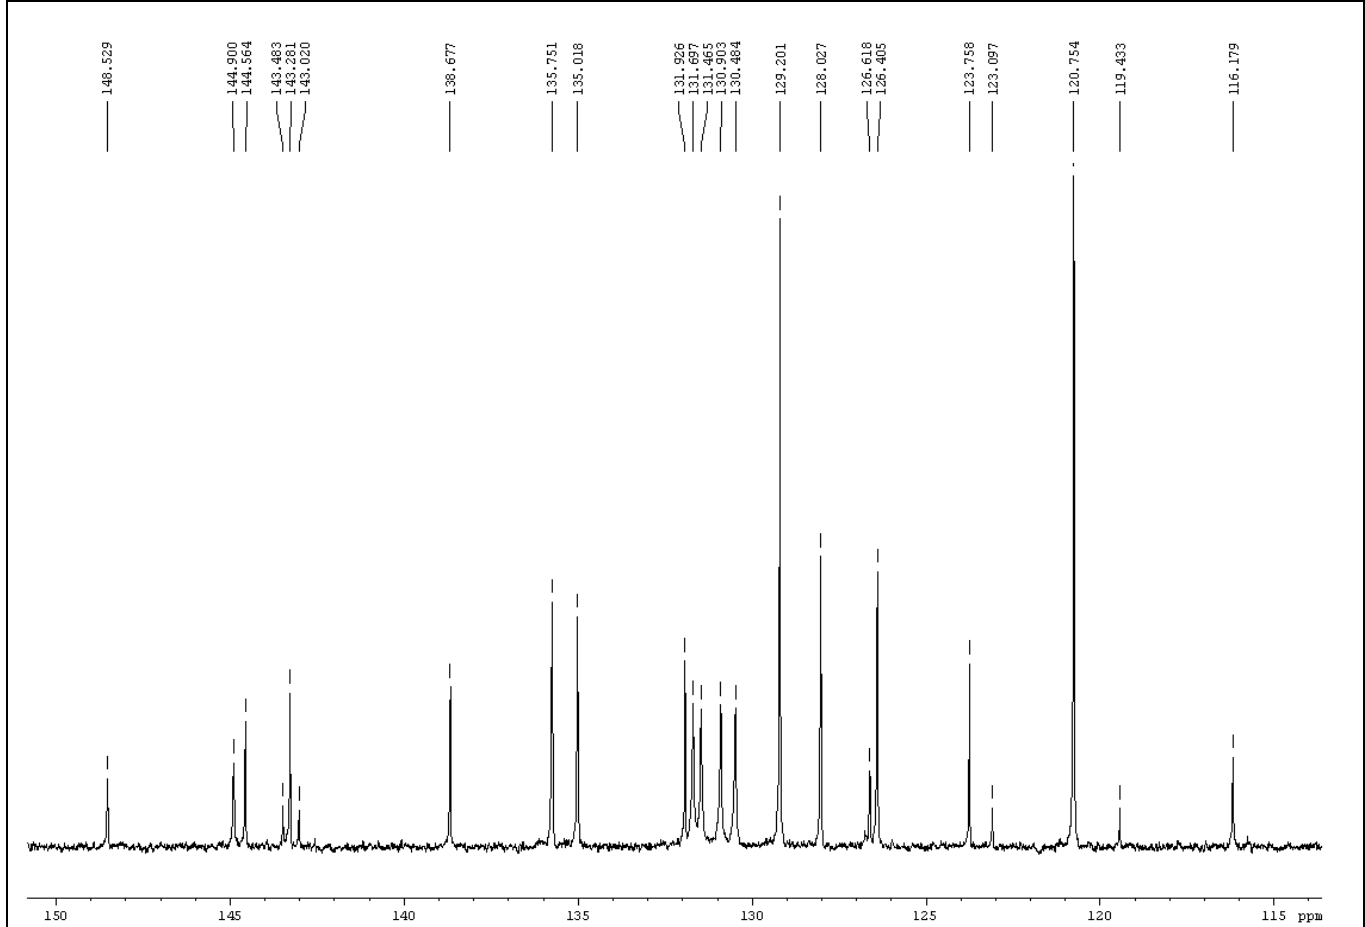

Figure 26.  $^{13}\text{C}$  NMR spectrum of 4d-expansion

Q10\_121026172426 #33 RT: 0.57 AV: 1 NL: 2.75E3  
T: ITMS + c ESI Full ms [100.00-1000.00]

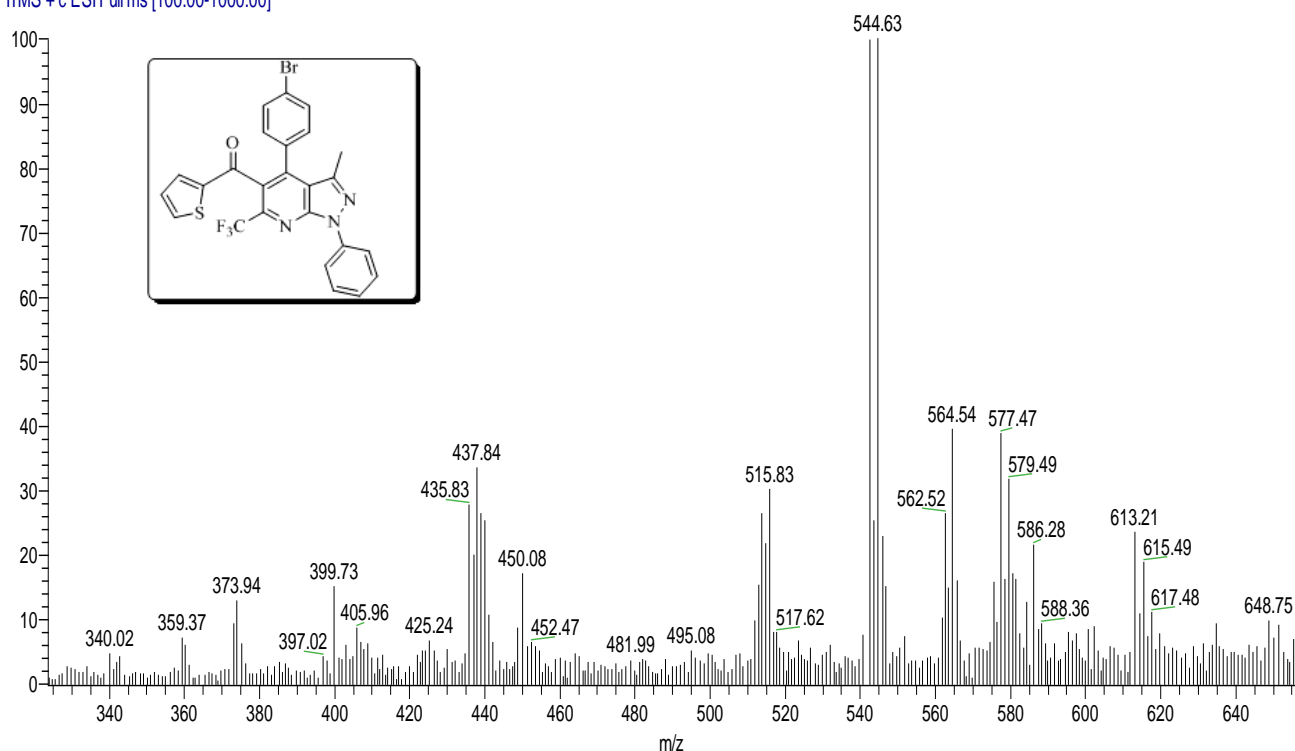

Figure 27. Mass spectrum of 4d

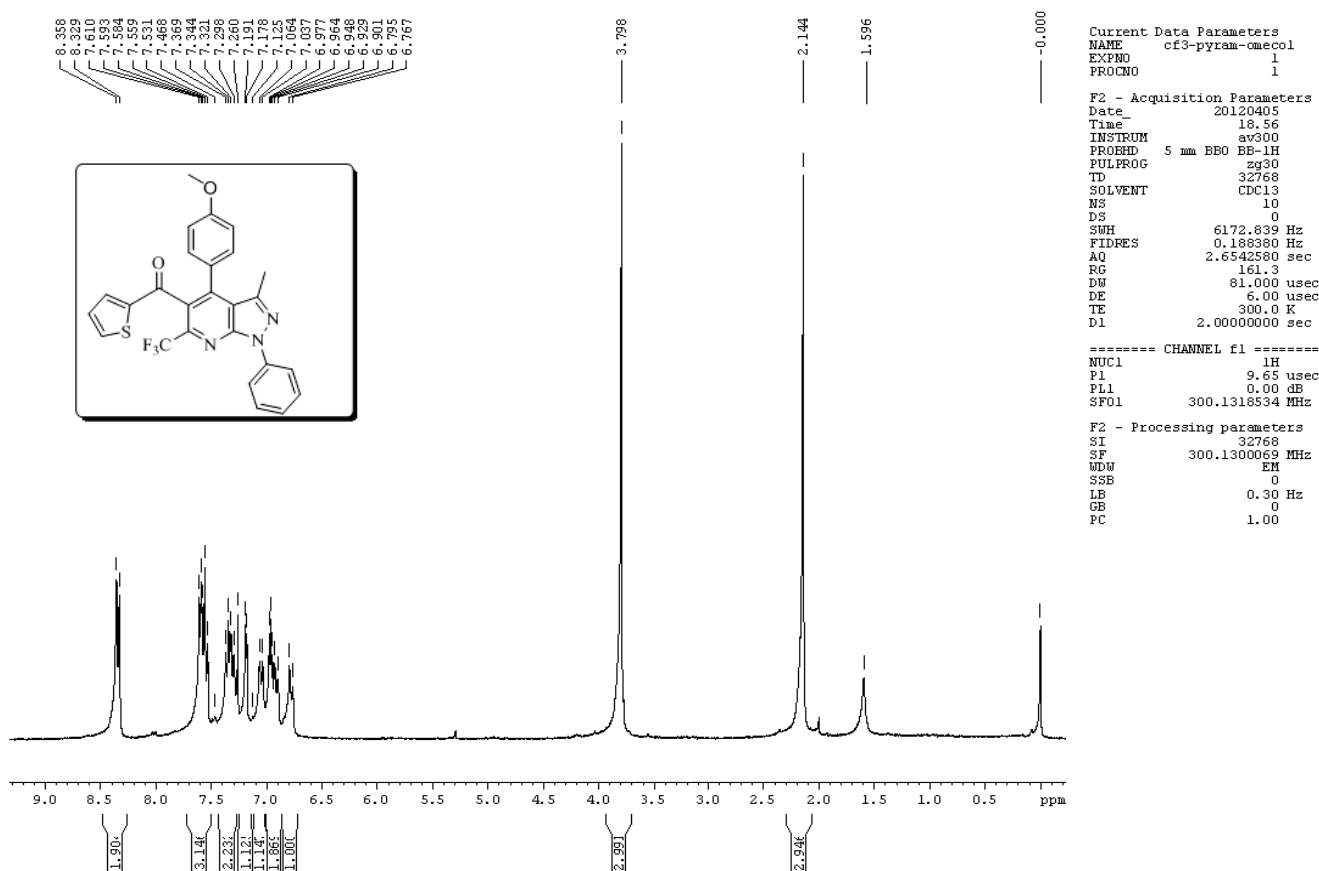

Figure 28. <sup>1</sup>H NMR spectrum of 4e-expansion

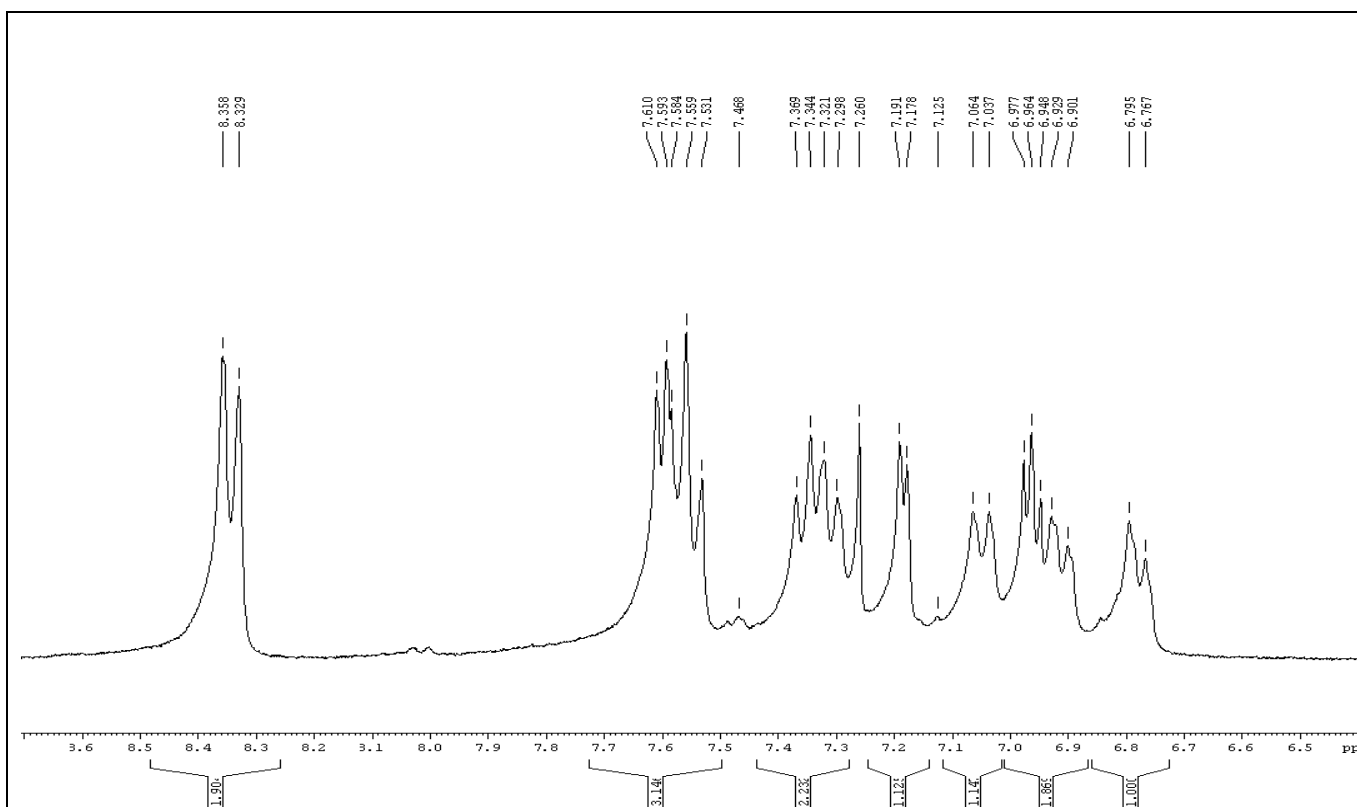

Figure 29.  $^1\text{H}$  NMR spectrum of 4e-expansion

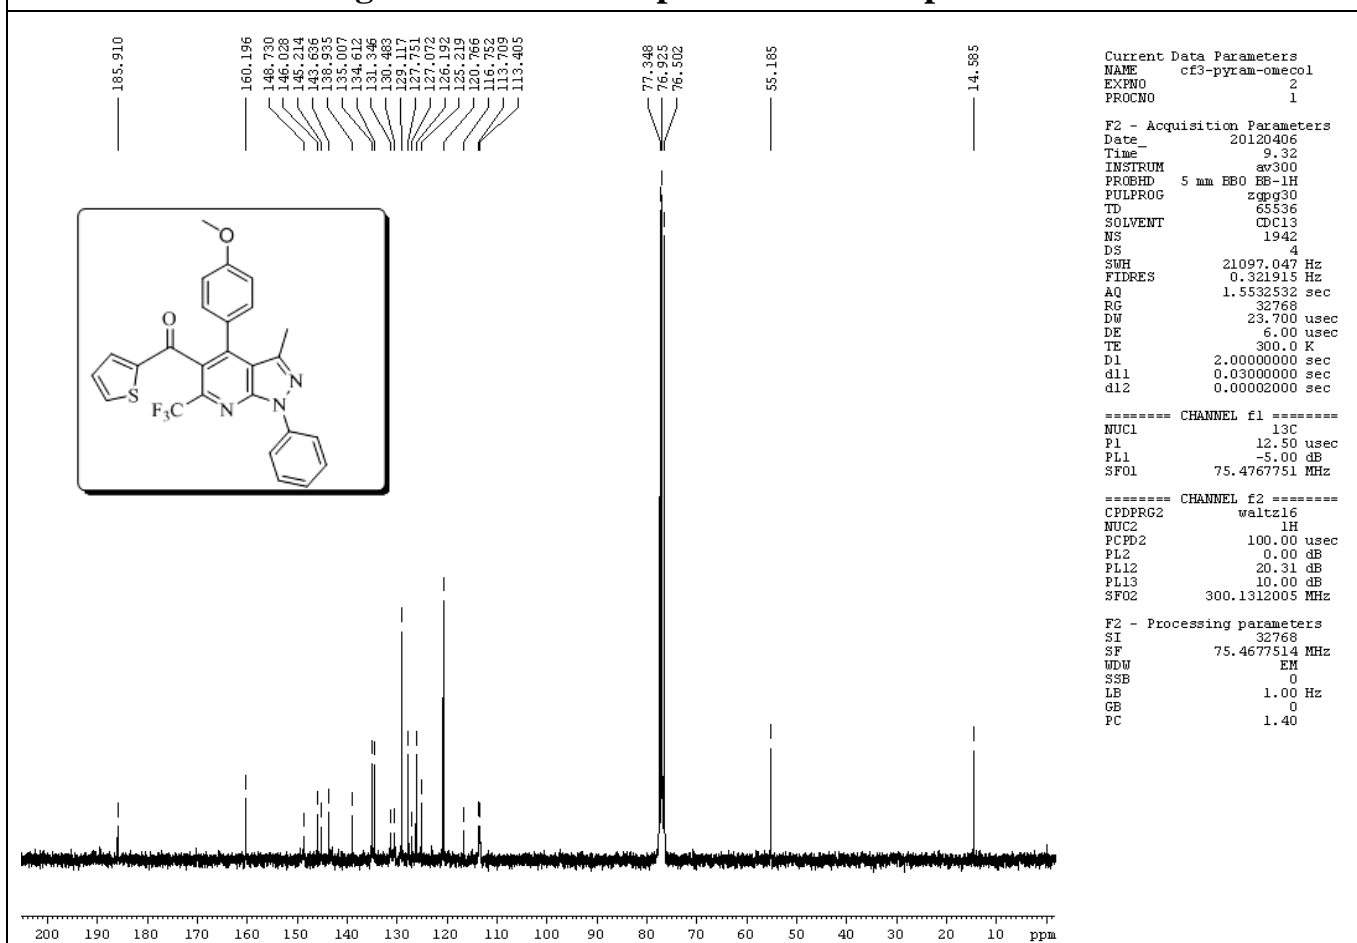

Figure 30.  $^{13}\text{C}$  NMR spectrum of 4e

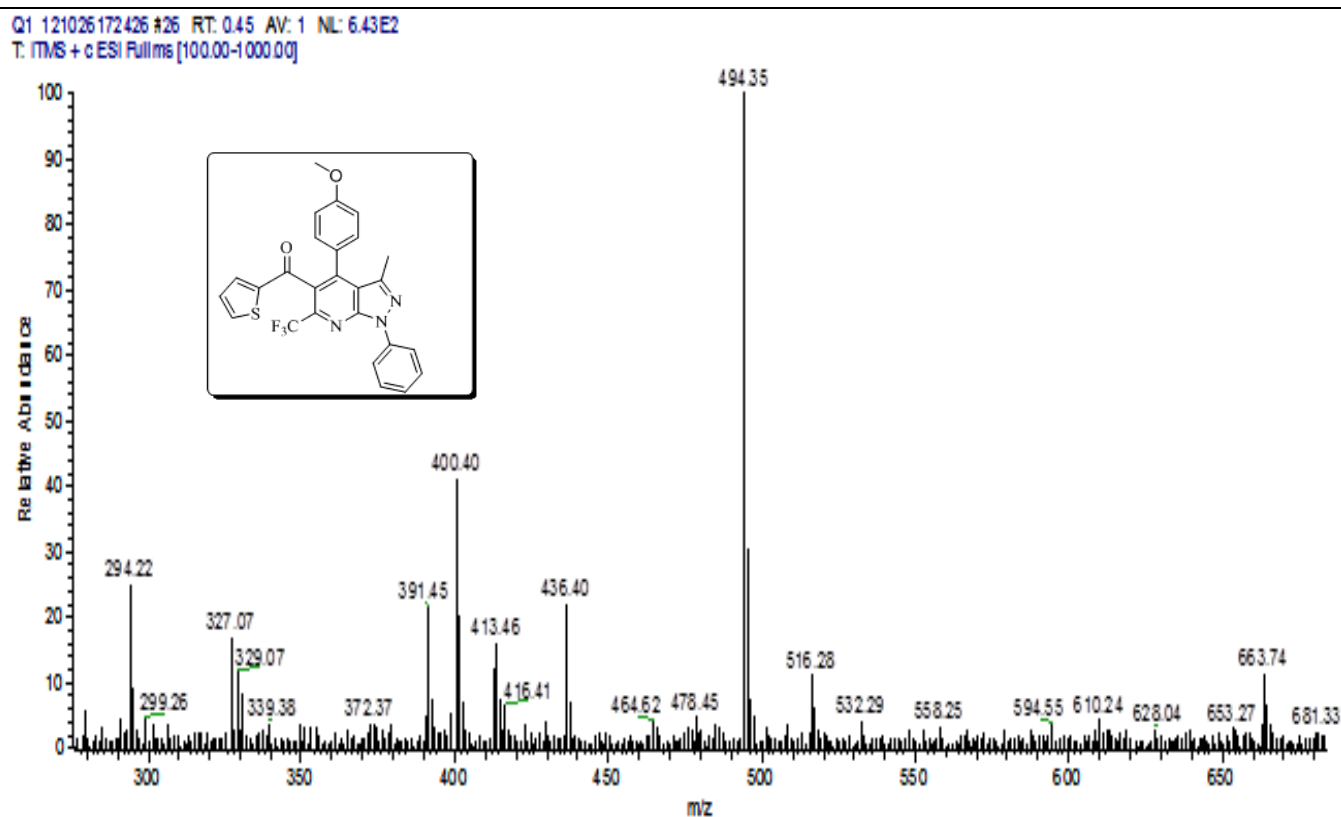

Figure 31. Mass spectrum of 4e

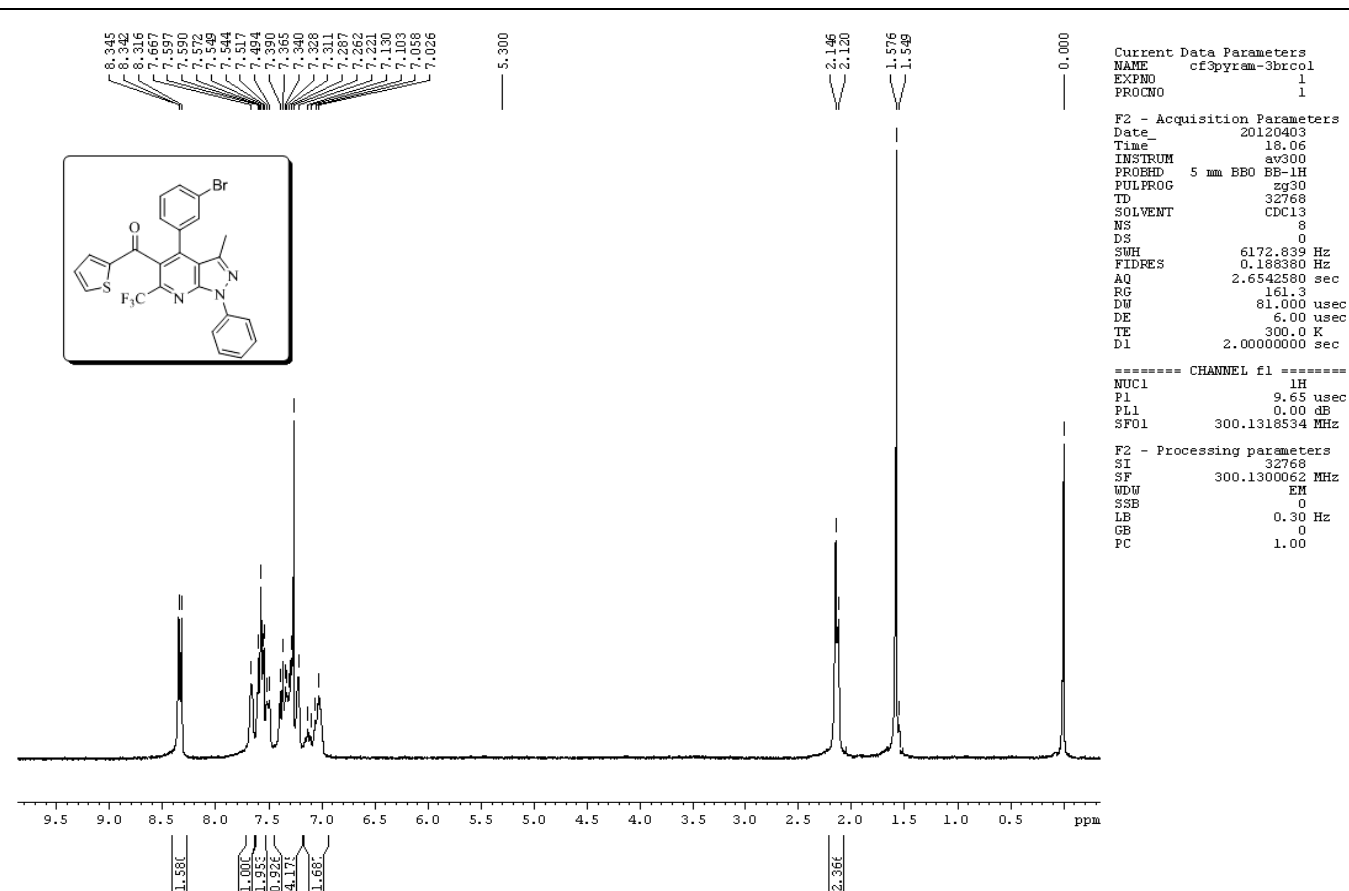

Figure 32. <sup>1</sup>H NMR spectrum of 4f

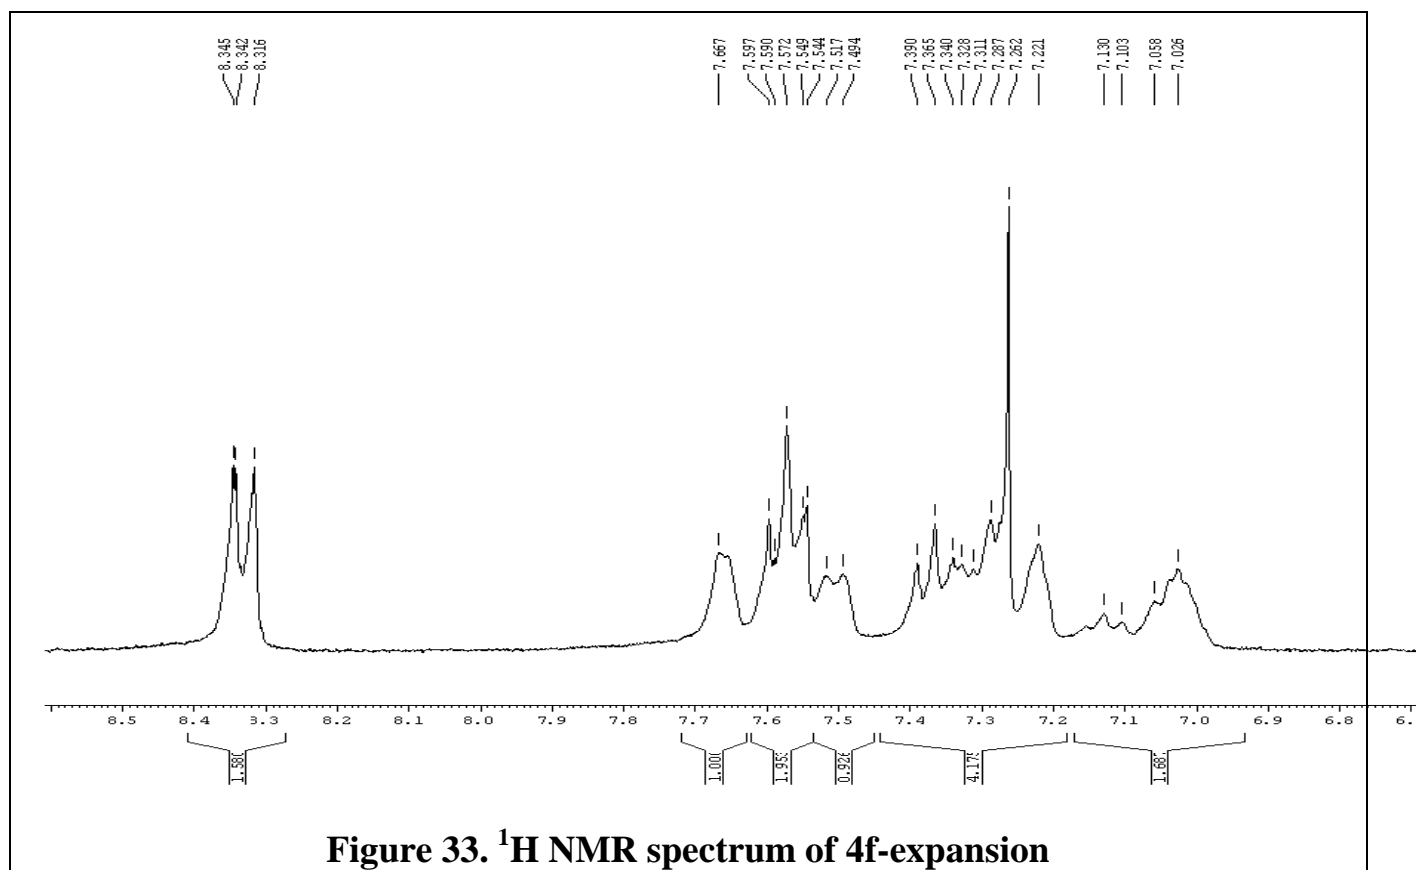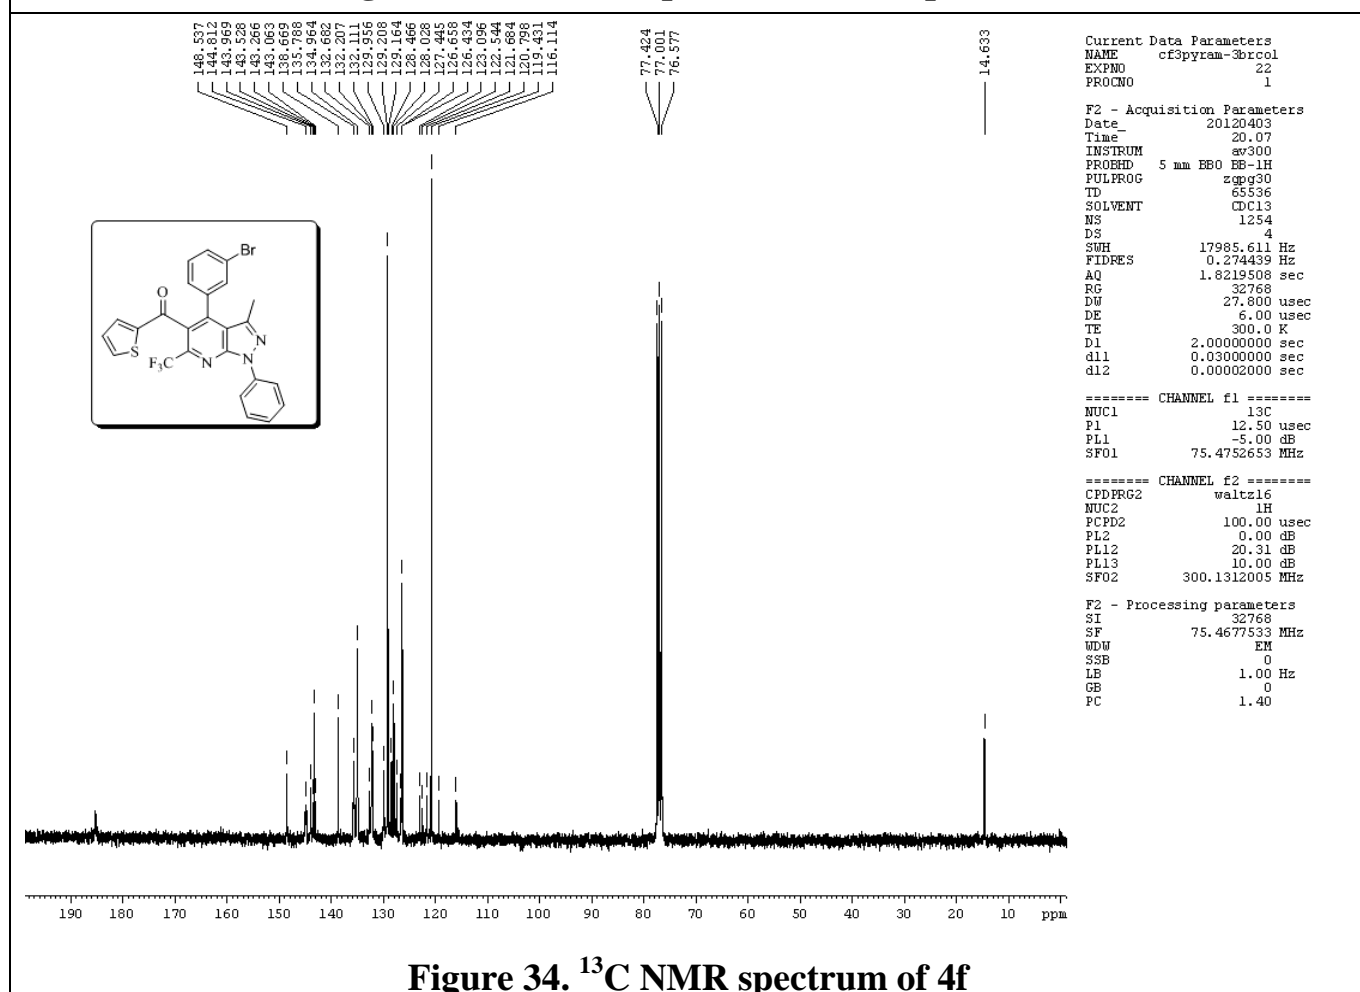

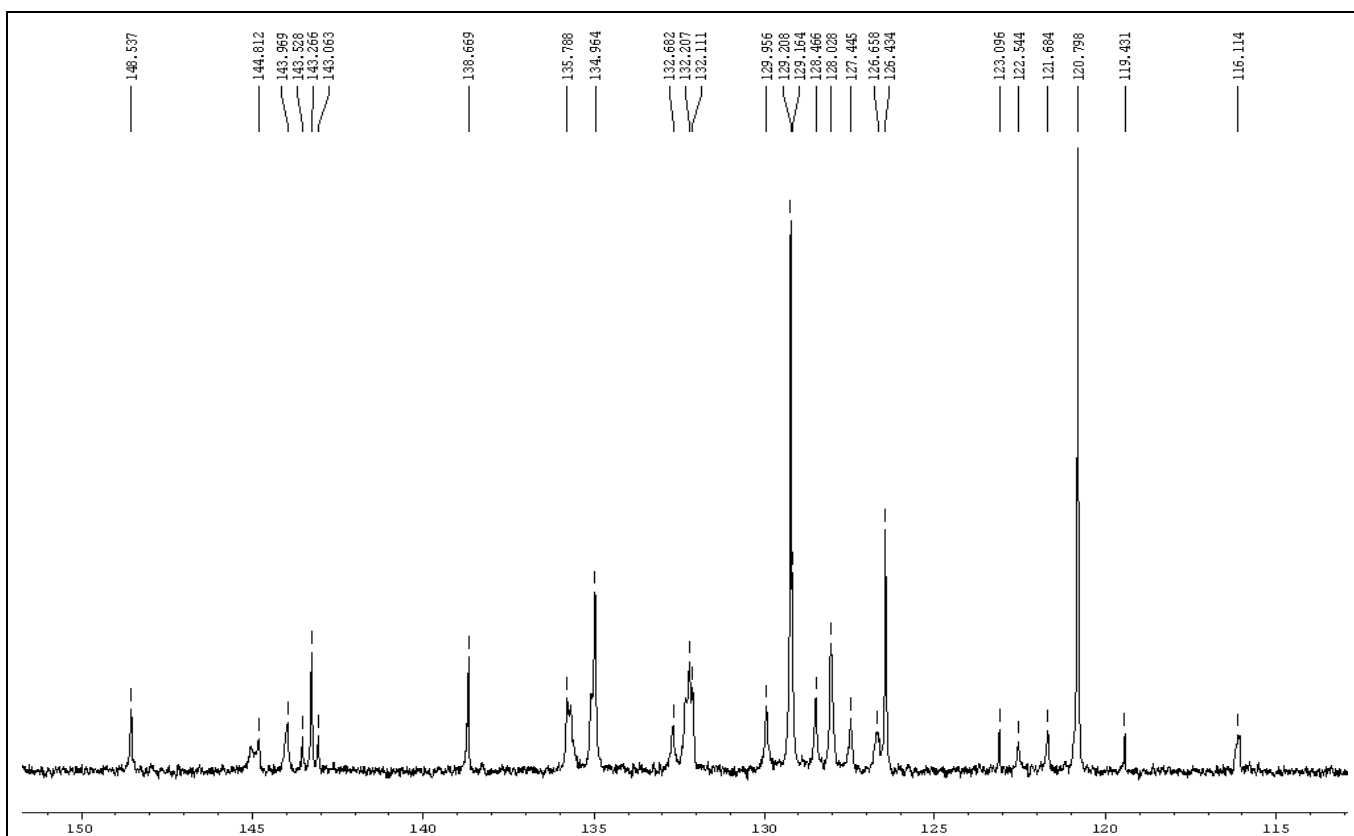

**Figure 35.  $^{13}\text{C}$  NMR spectrum of 4f-expansion**

Q6\_121026172426 #34 RT: 0.58 AV: 1 NL: 1.11E3  
T: ITMS + c ESI Full ms [100.00-1000.00]

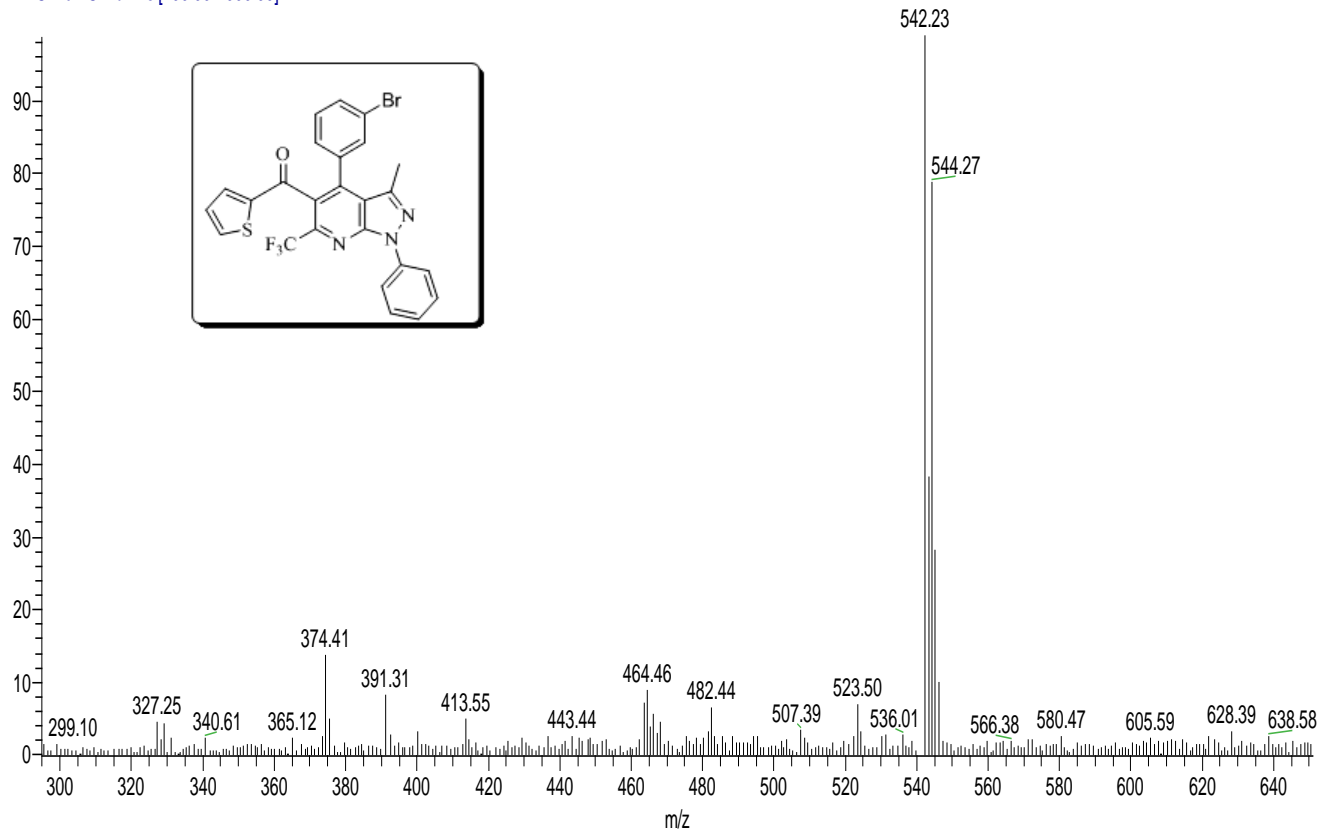

**Figure 36. Mass spectrum of 4f**

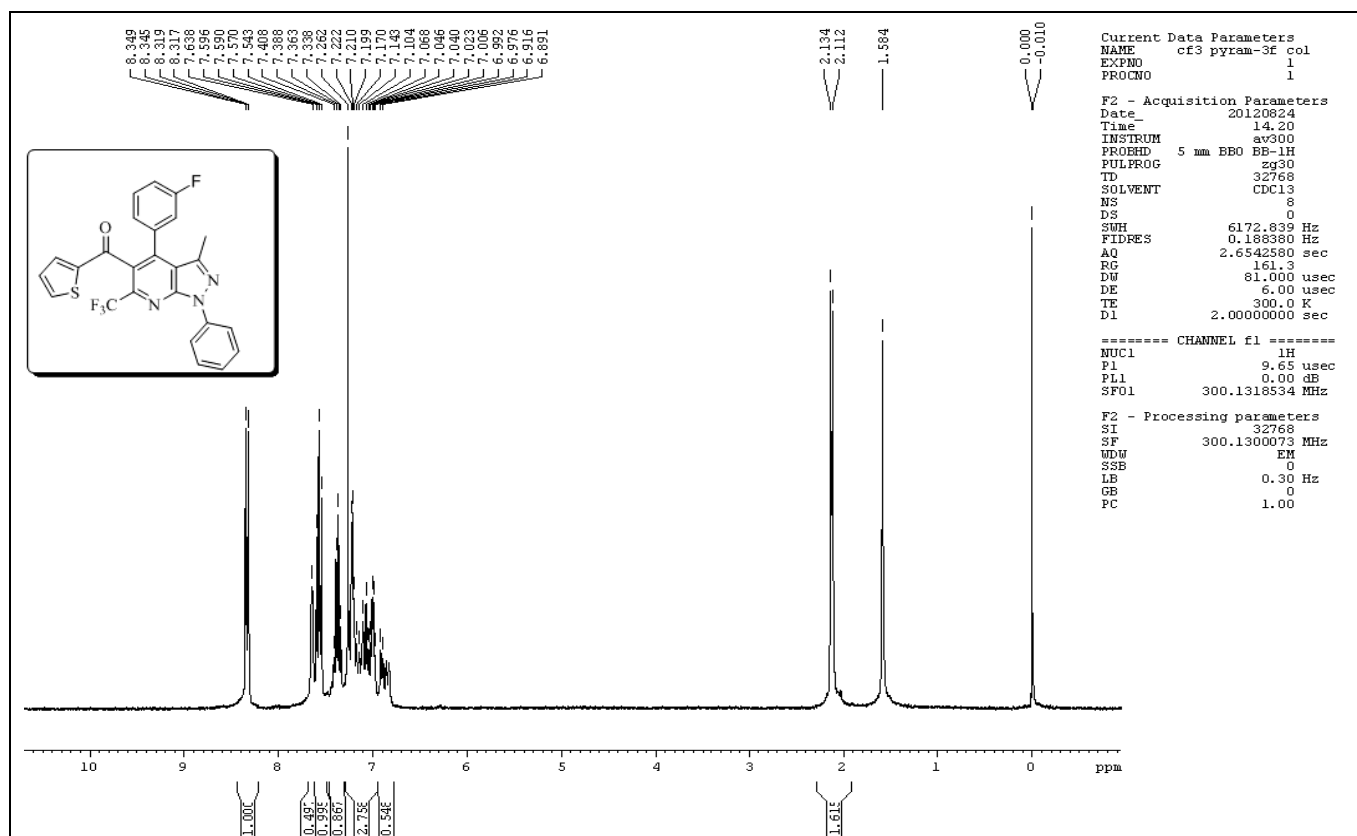

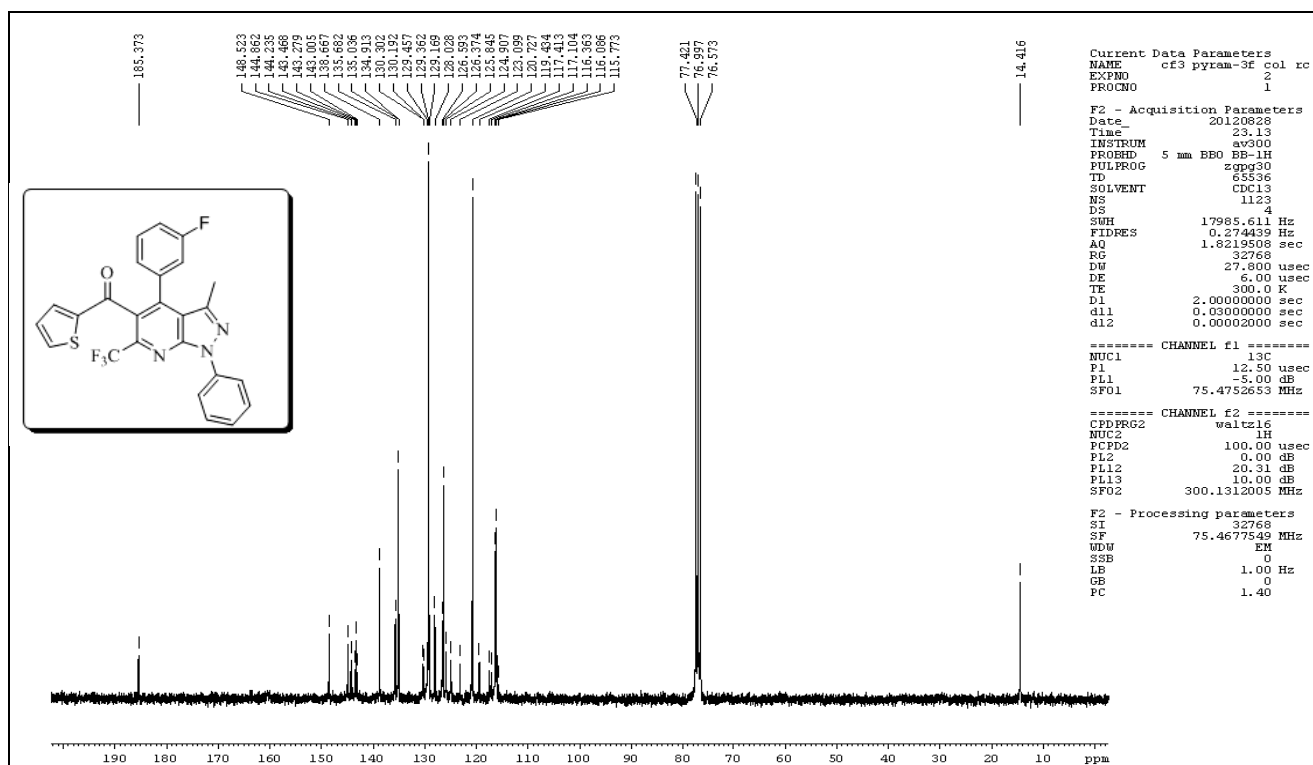

Figure 39.  $^{13}\text{C}$  NMR spectrum of 4g

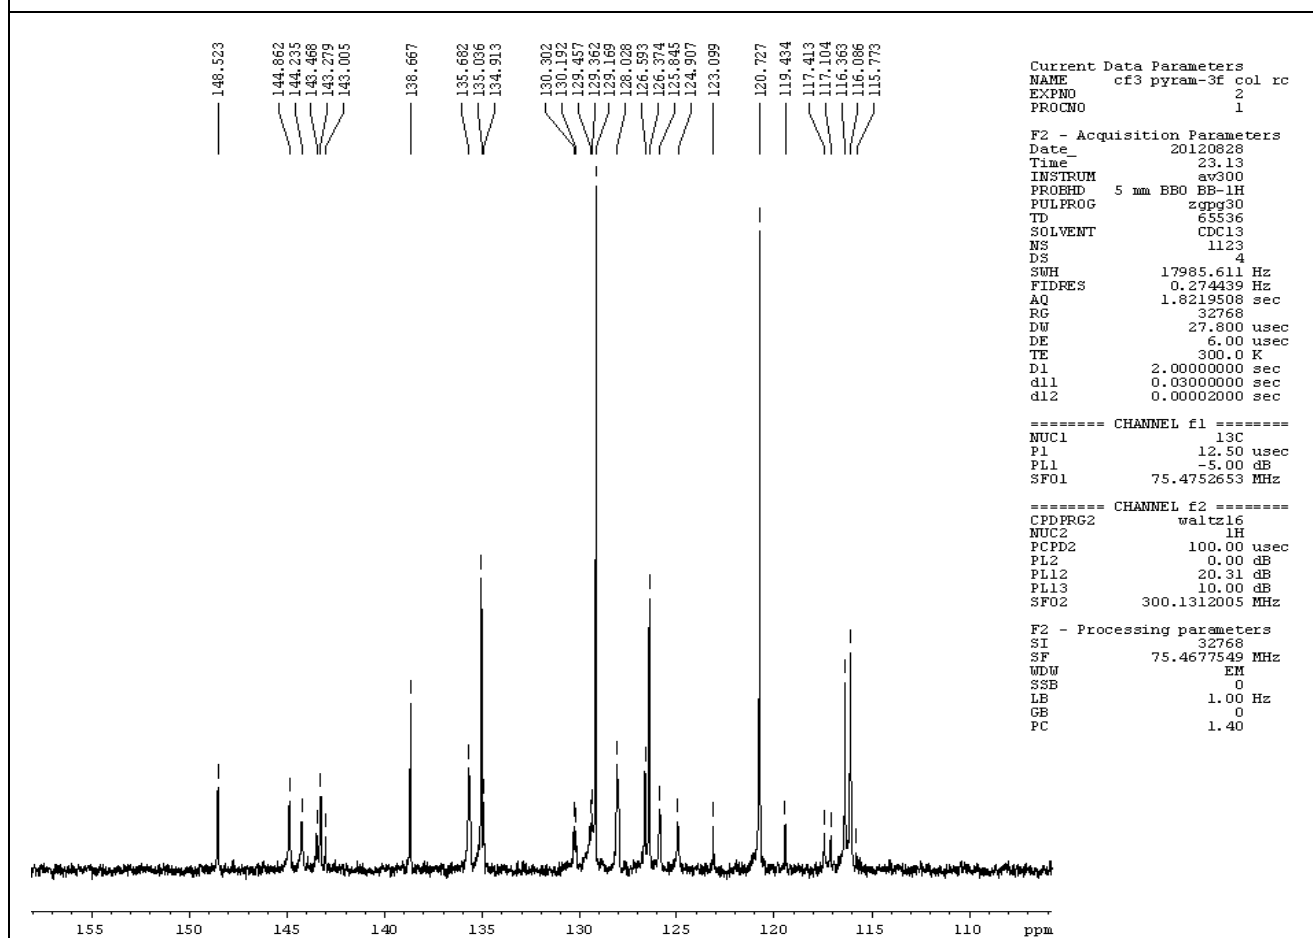

Figure 40.  $^{13}\text{C}$  NMR spectrum of 4g-expansion



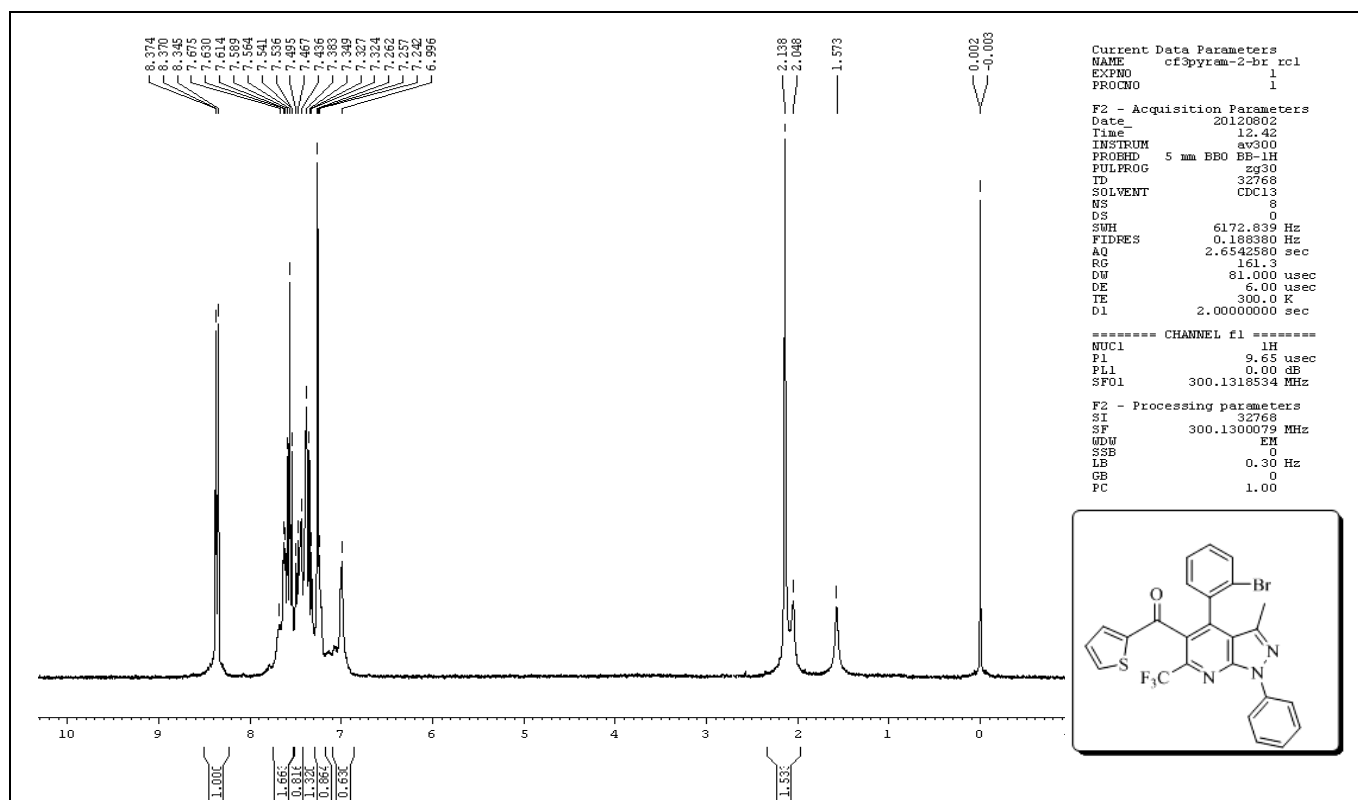

Figure 41.  $^1\text{H}$  NMR spectrum of 4h

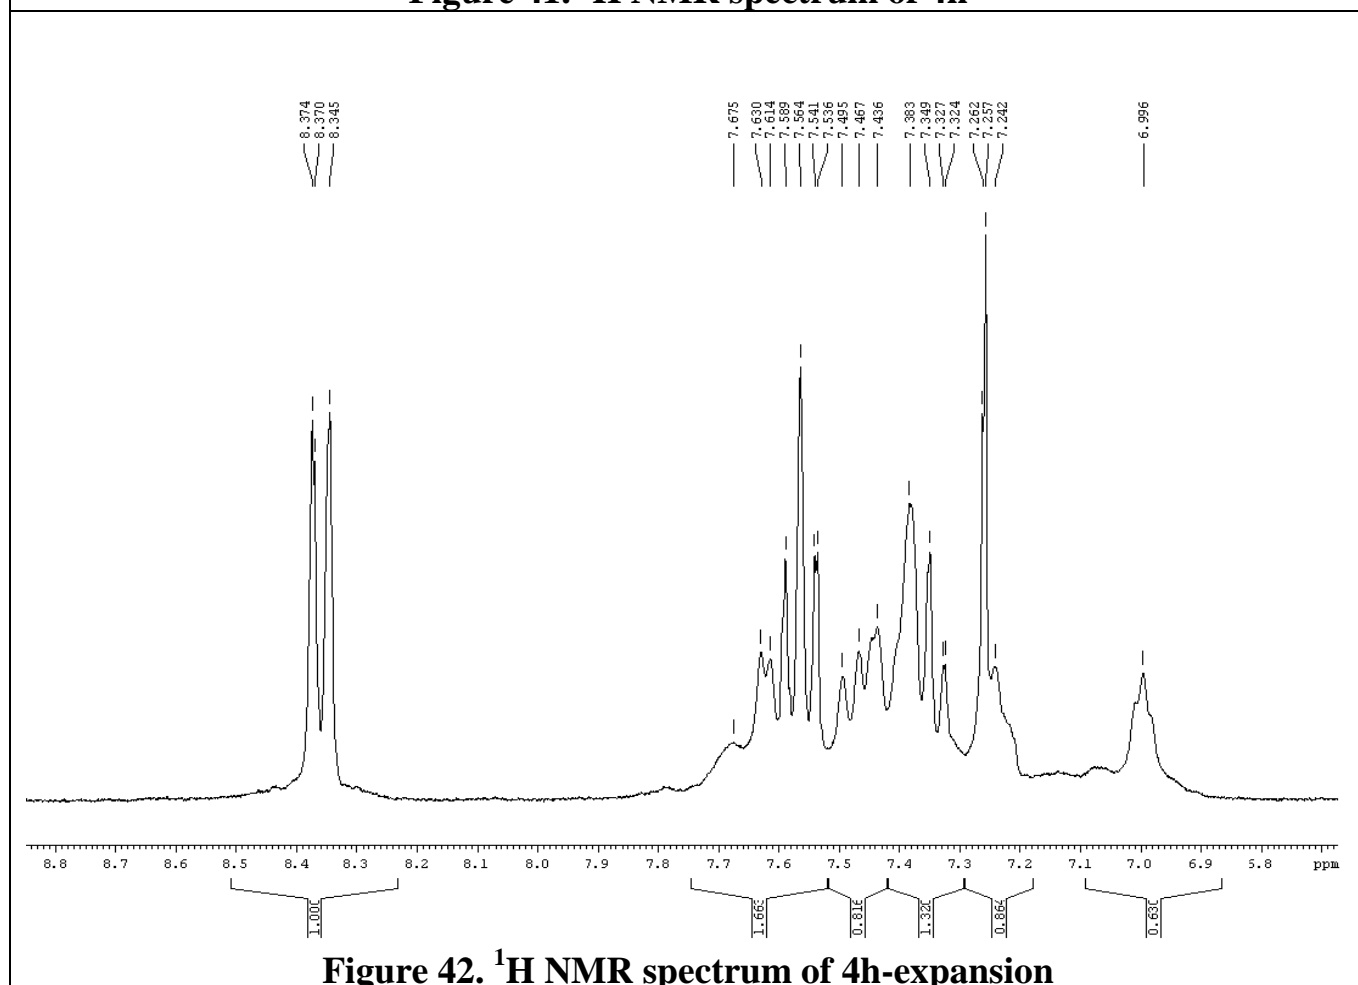

Figure 42.  $^1\text{H}$  NMR spectrum of 4h-expansion

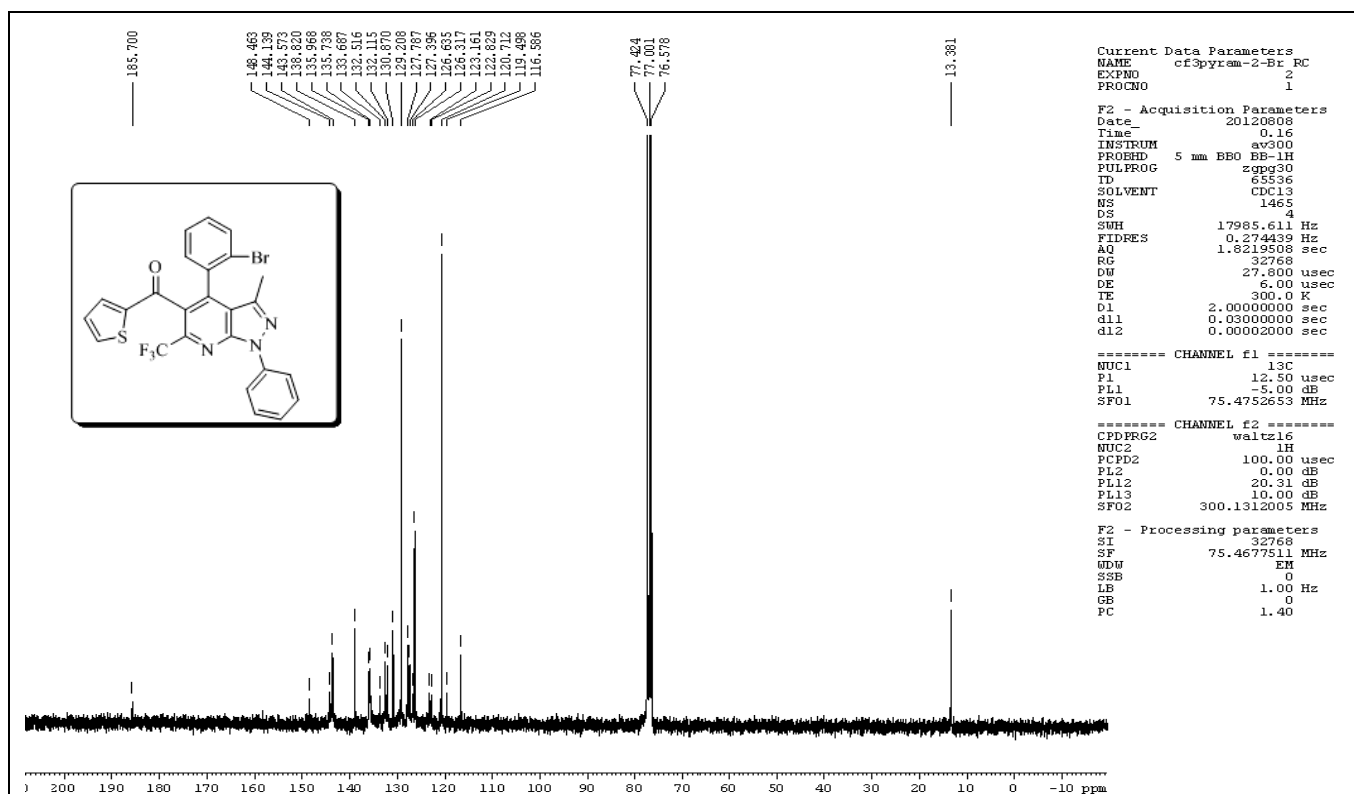

**Figure 43.  $^{13}\text{C}$  NMR spectrum of 4h**

Q11\_121026172426 #38 RT: 0.62 AV: 1 NL: 2.64E3  
T: [TMS + c ESI Full ms [100.00-1000.00]]

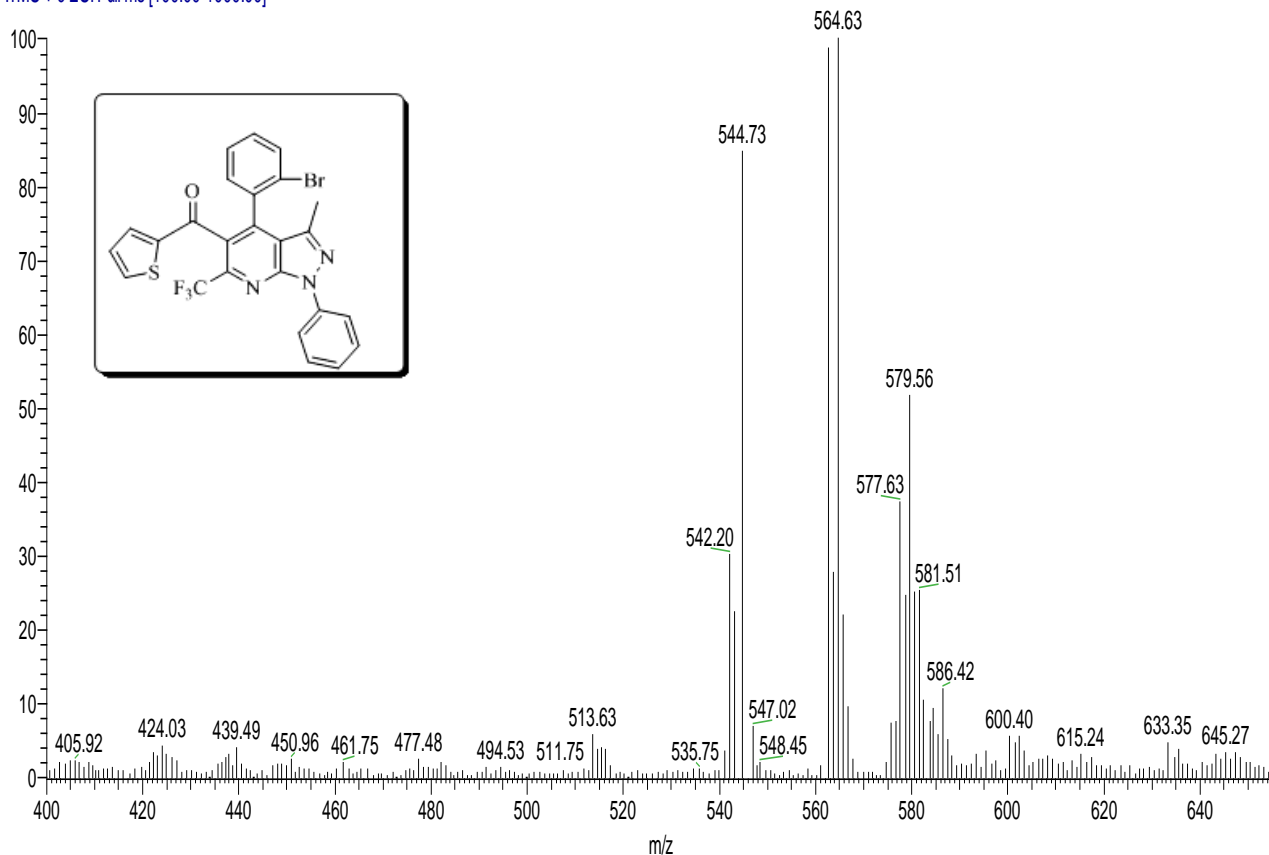

**Figure 44. Mass spectrum of 4h**

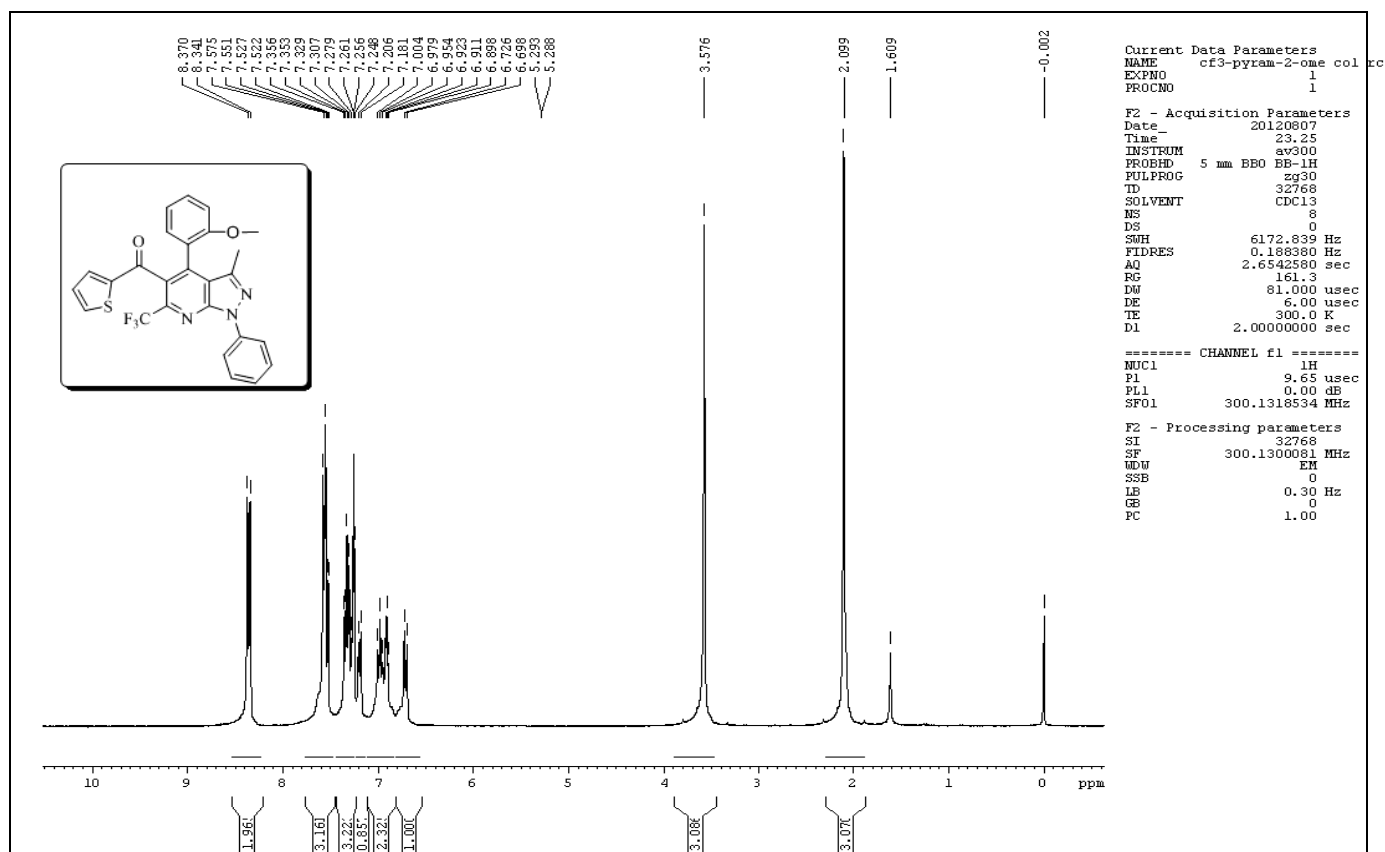

Figure 45. <sup>1</sup>H NMR spectrum of 4i

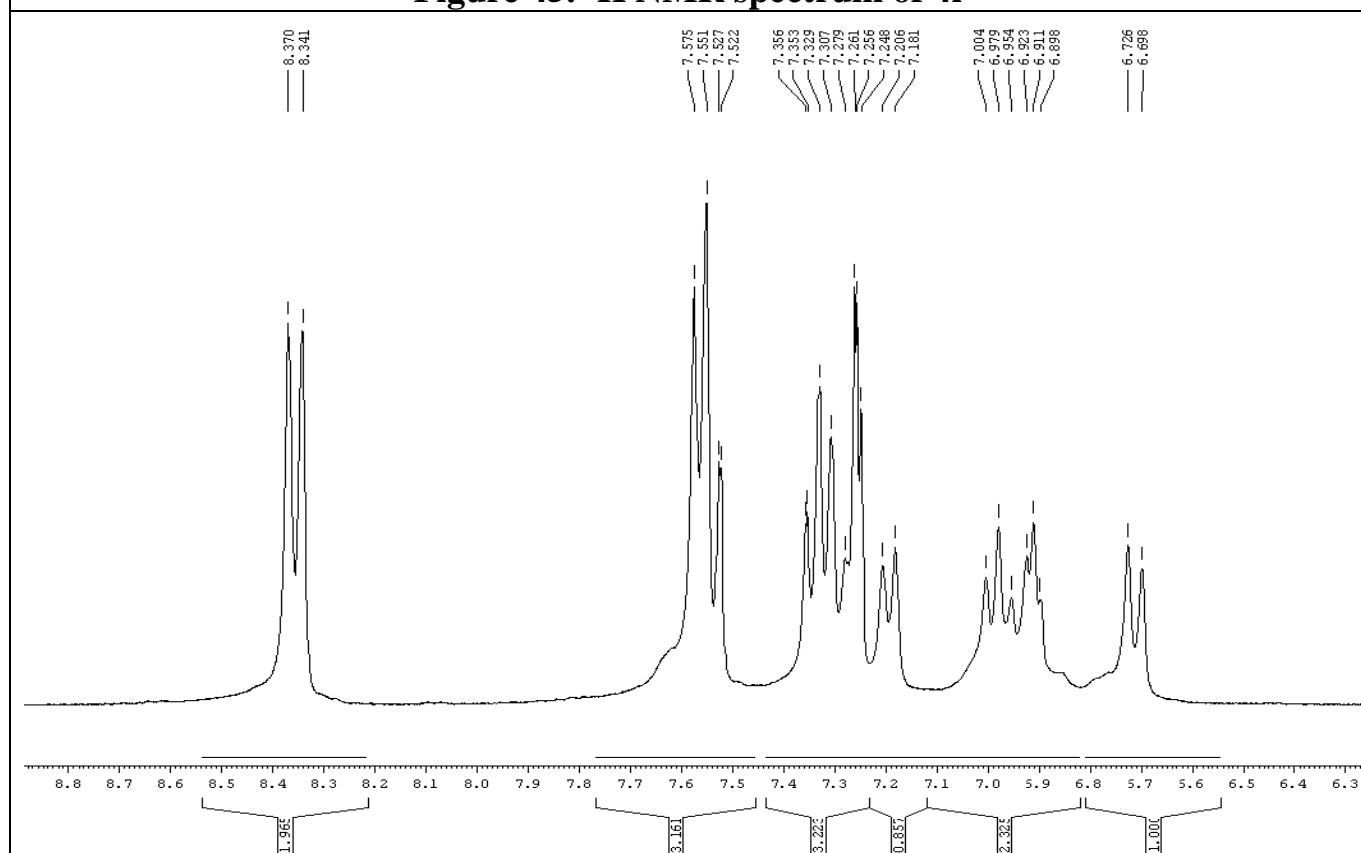

Figure 46. <sup>1</sup>H NMR spectrum of 4i-expansion

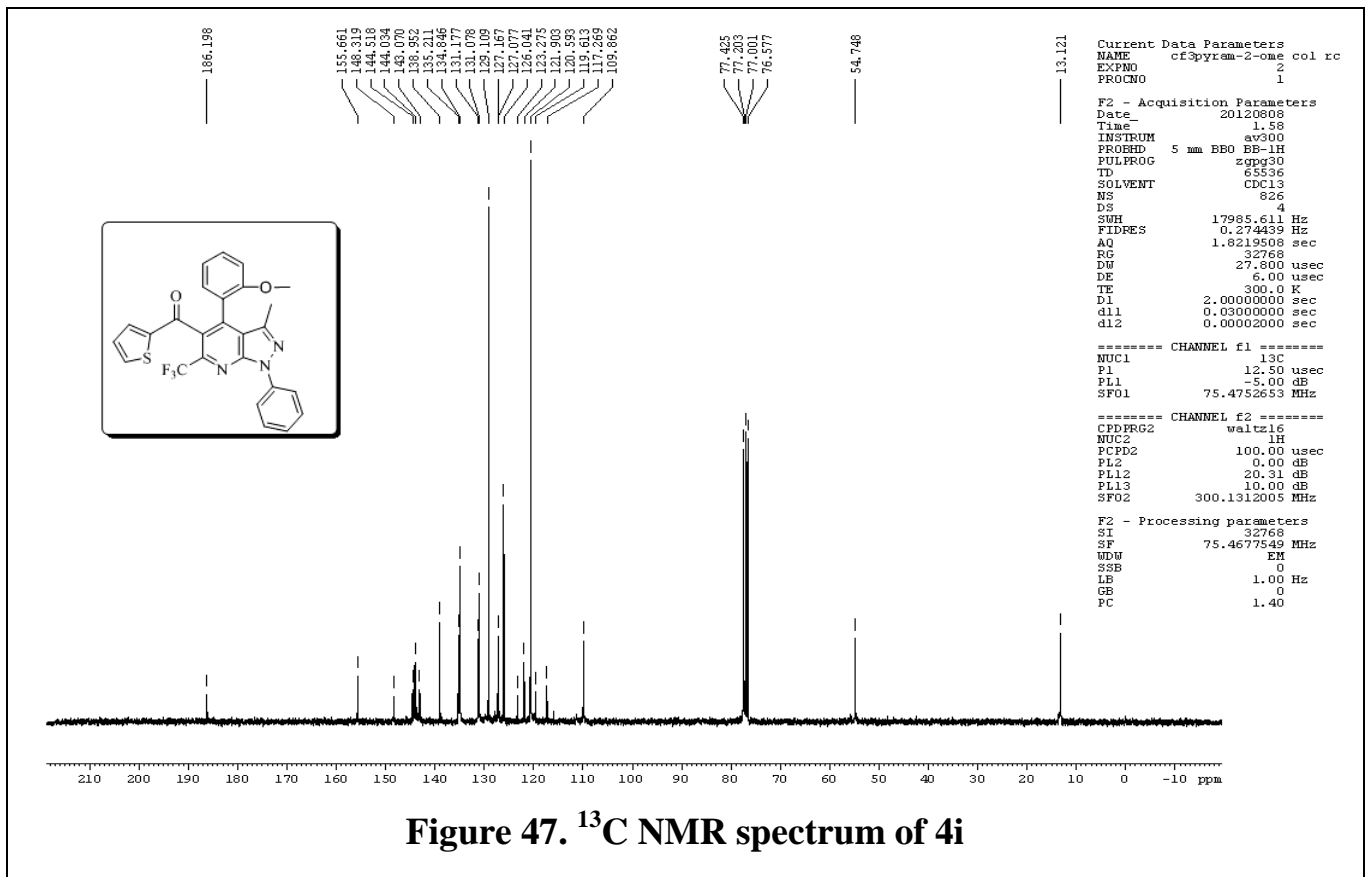

Figure 47. <sup>13</sup>C NMR spectrum of 4i

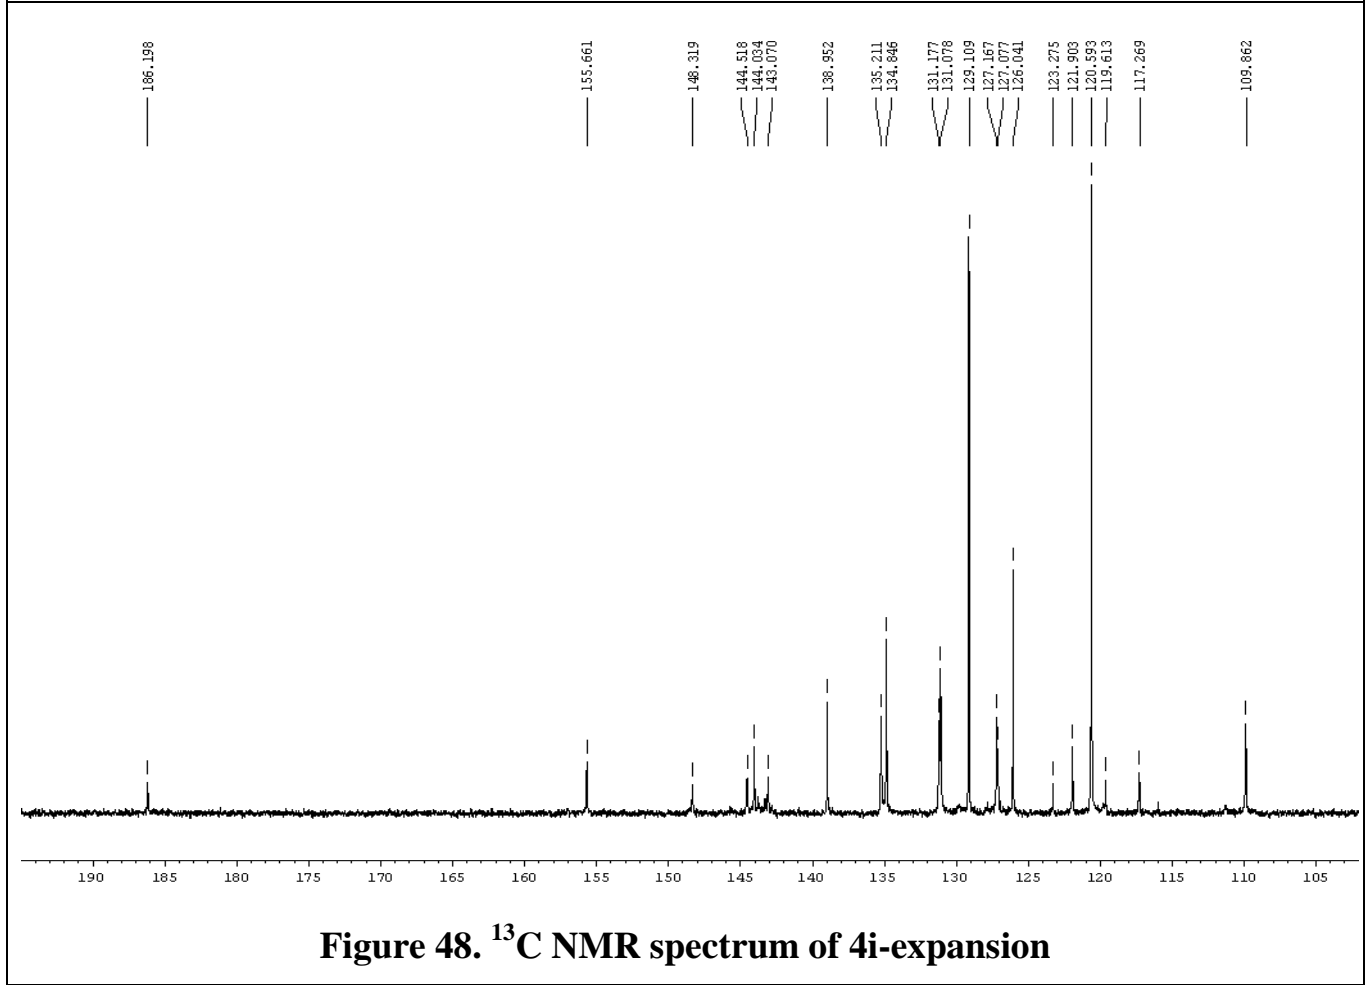

Figure 48. <sup>13</sup>C NMR spectrum of 4i-expansion

Q12\_121026172426 #45 RT: 0.78 AV: 1 NL: 1.02E3  
T: ITMS + c ESI Full ms [100.00-1000.00]

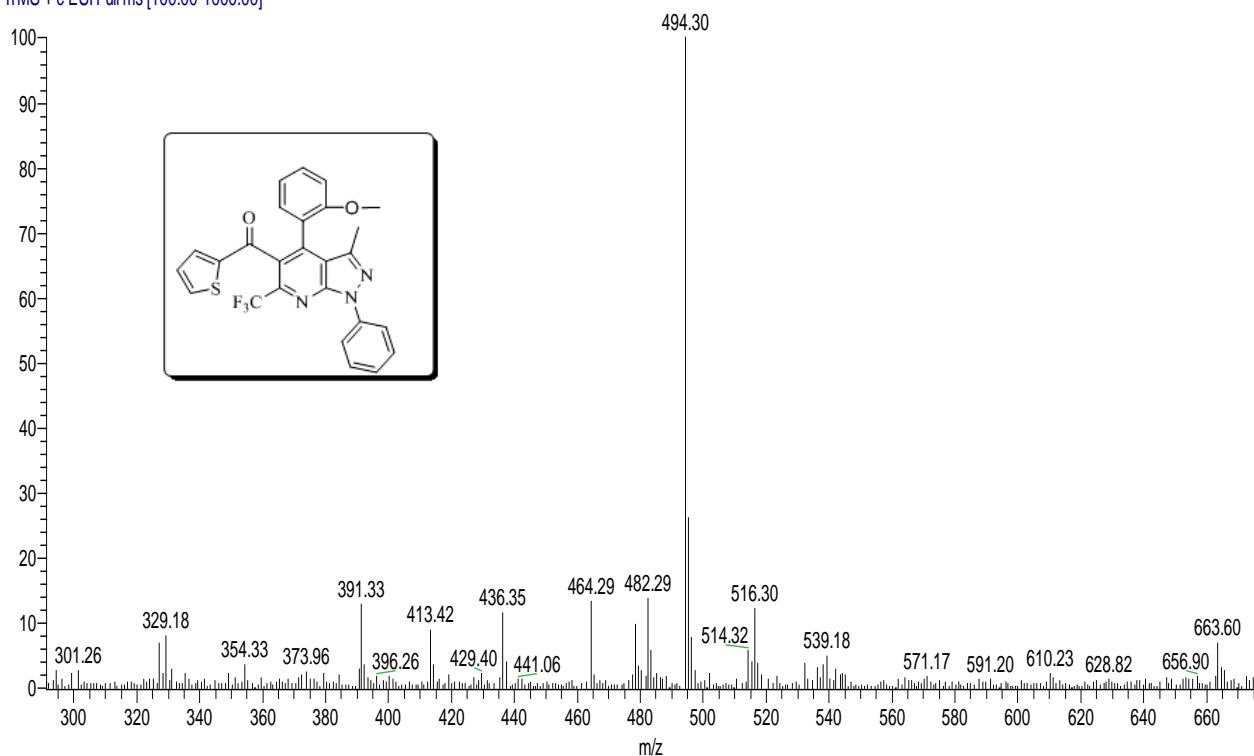

Figure 49. Mass spectrum of 4i

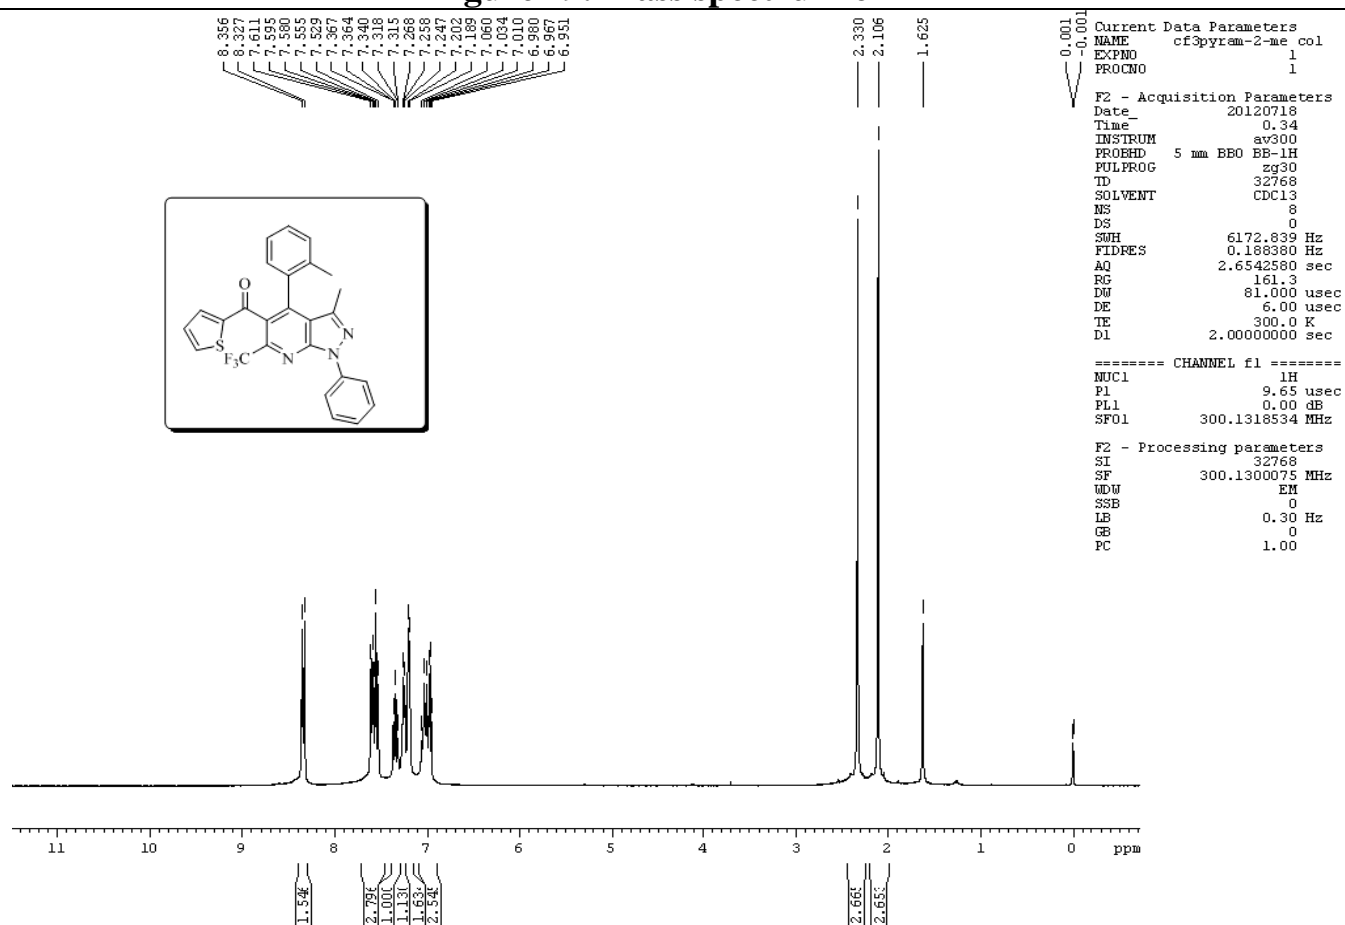

Figure 50. <sup>1</sup>H NMR spectrum of 4j

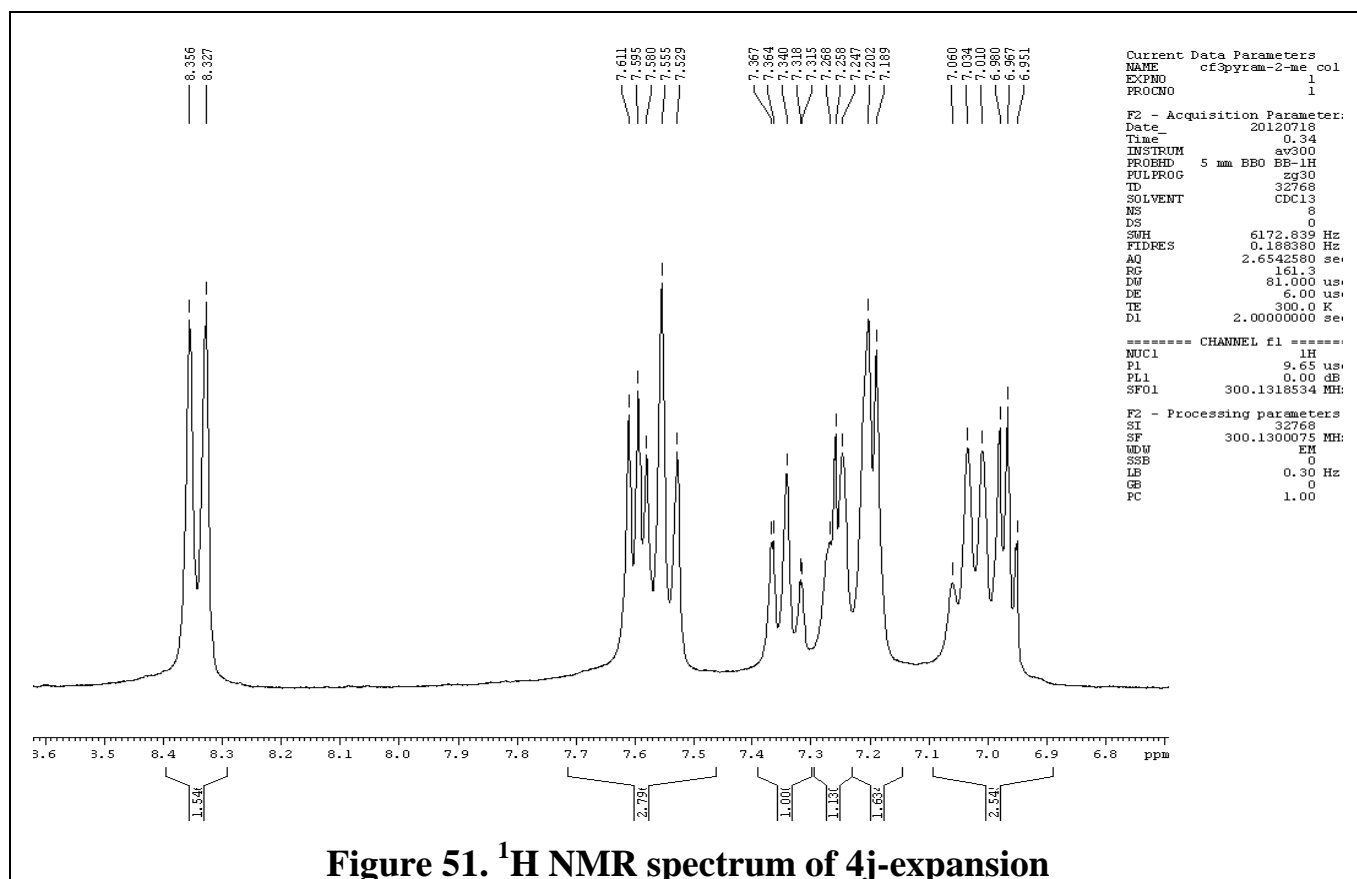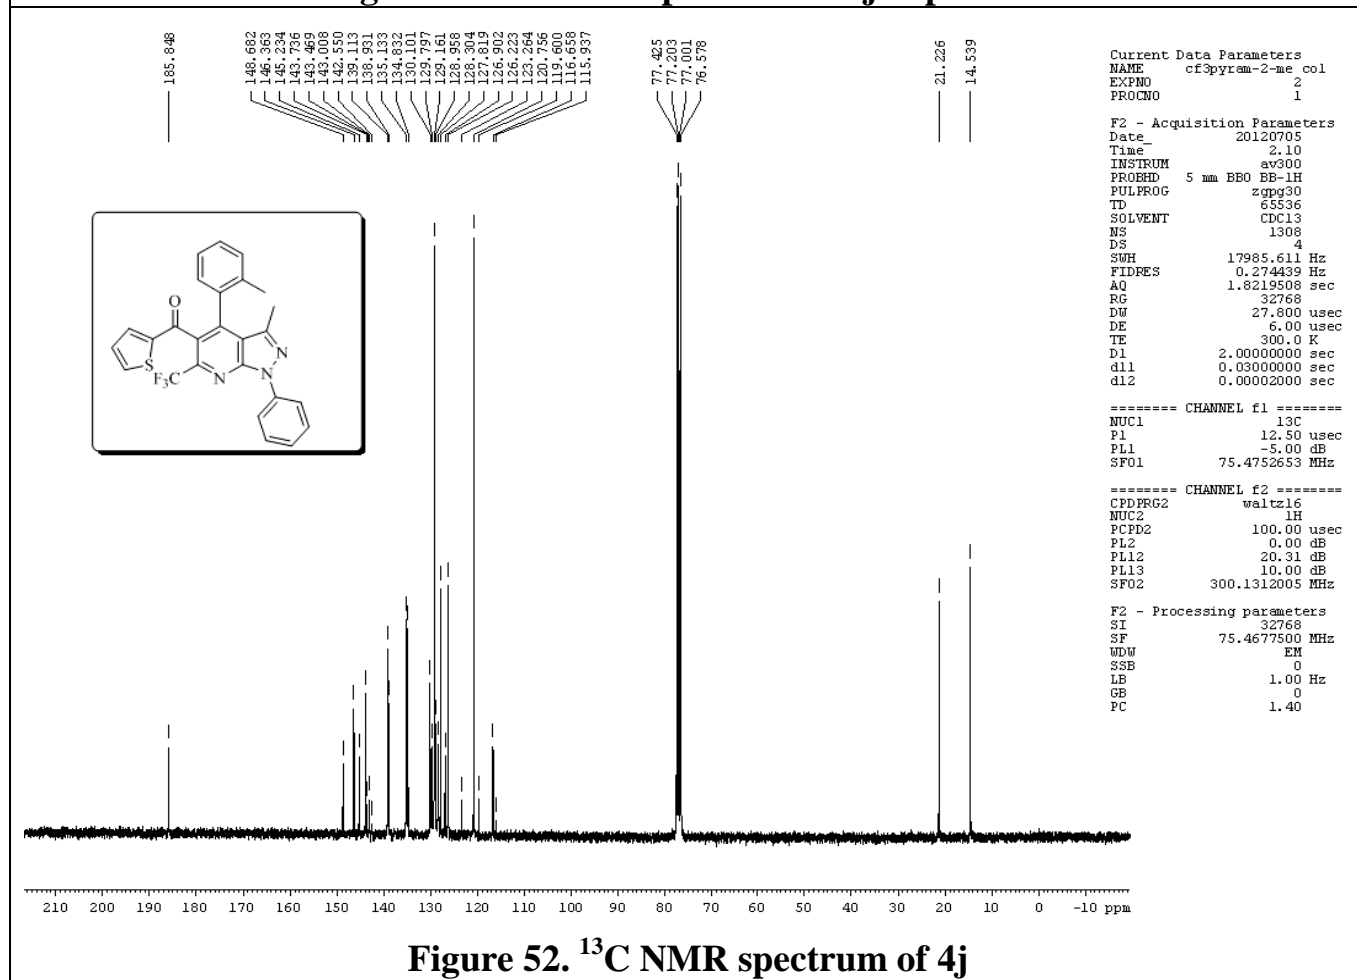

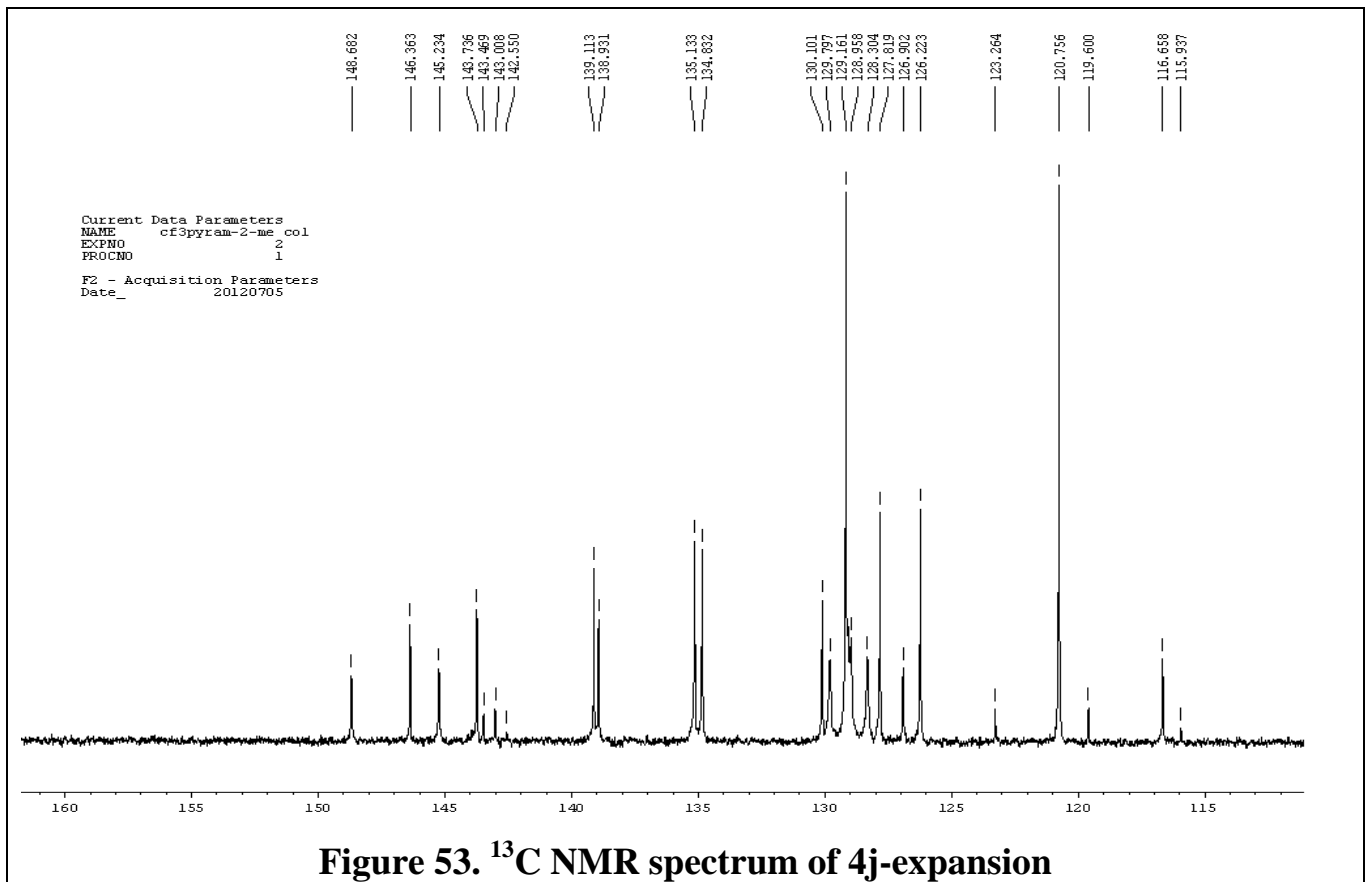

Q15\_121026172426 #34 RT: 0.57 AV: 1 NL: 5.14E3  
T: ITMS + c ESI Full ms [100.00-1000.00]

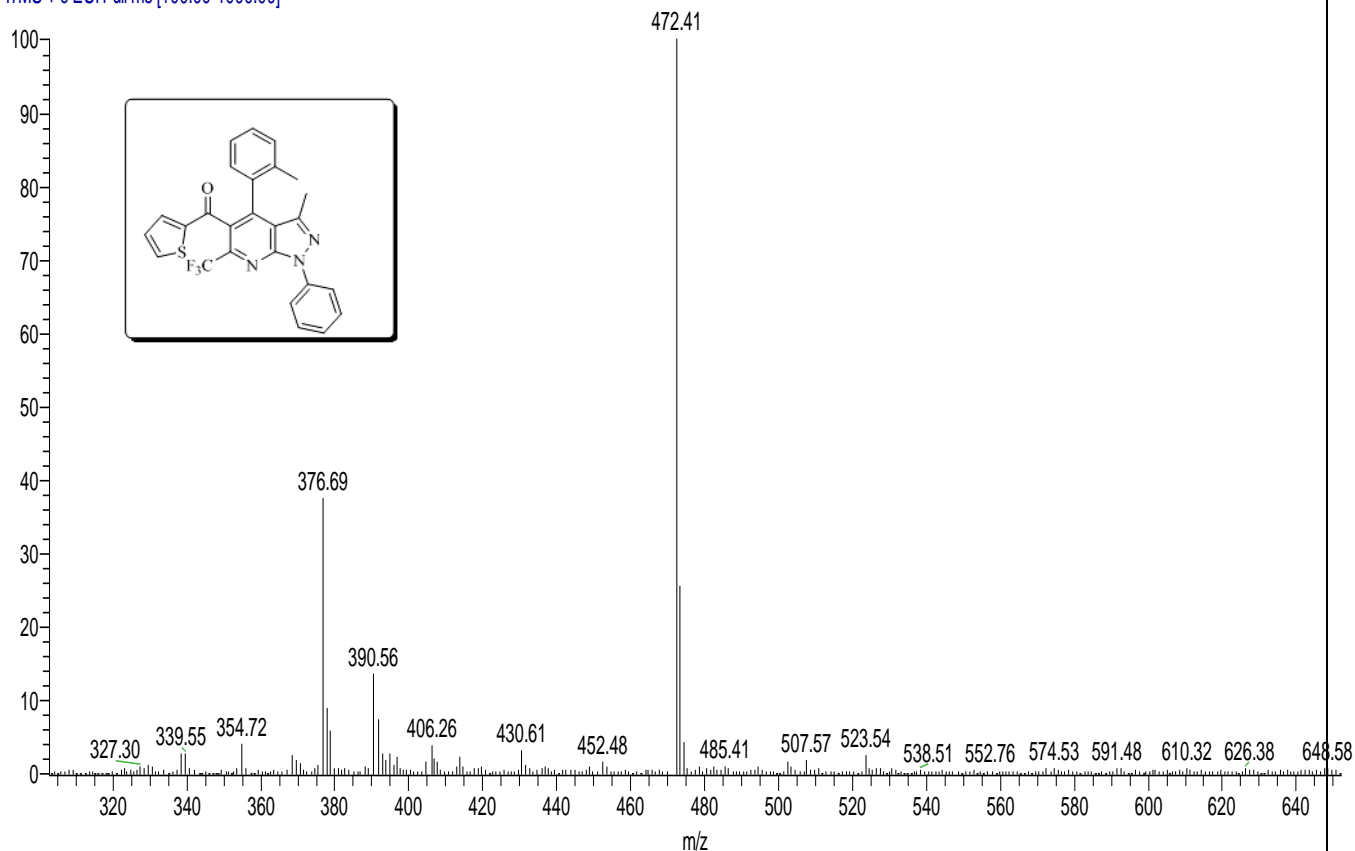

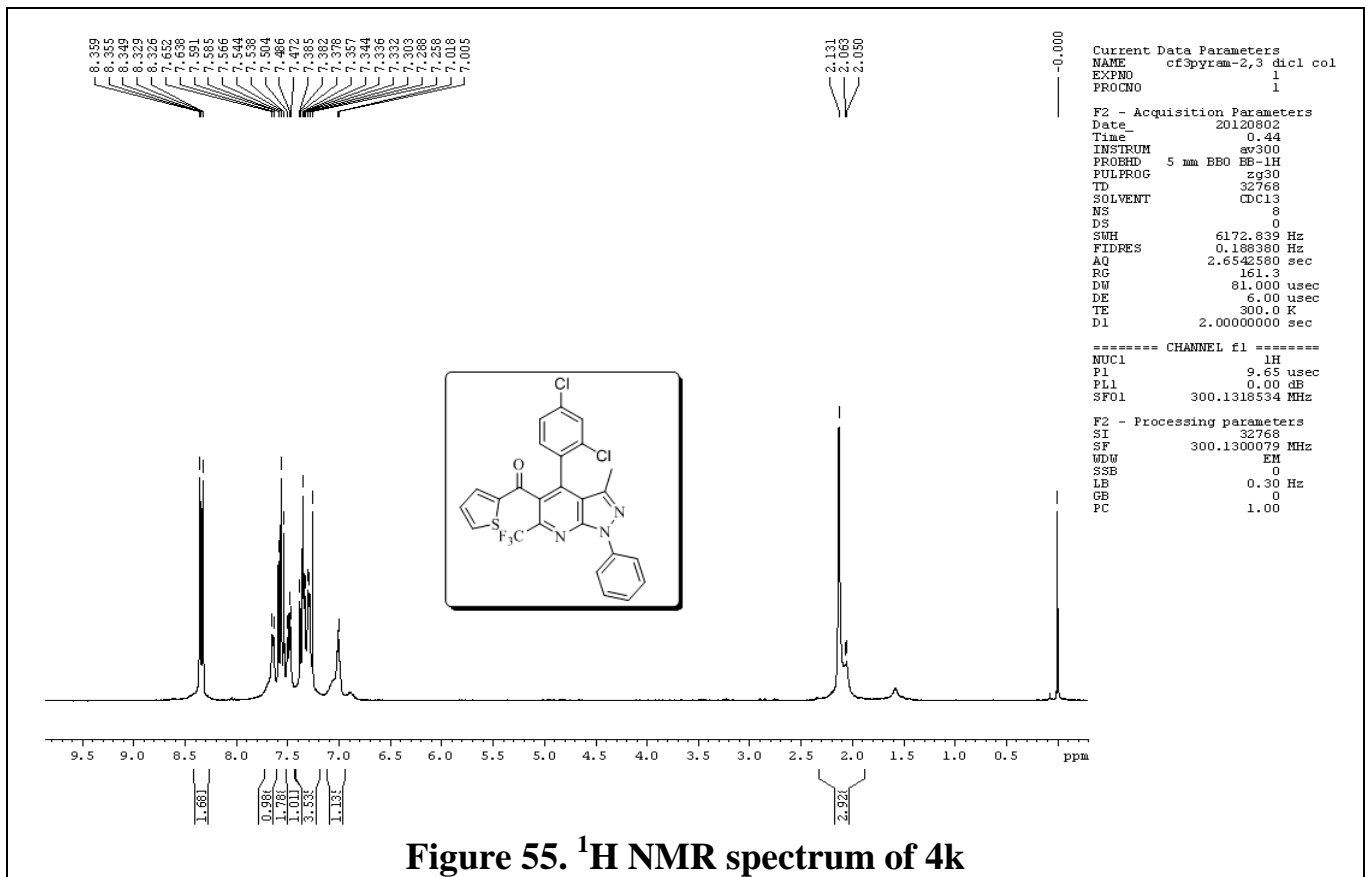

Figure 55. <sup>1</sup>H NMR spectrum of 4k

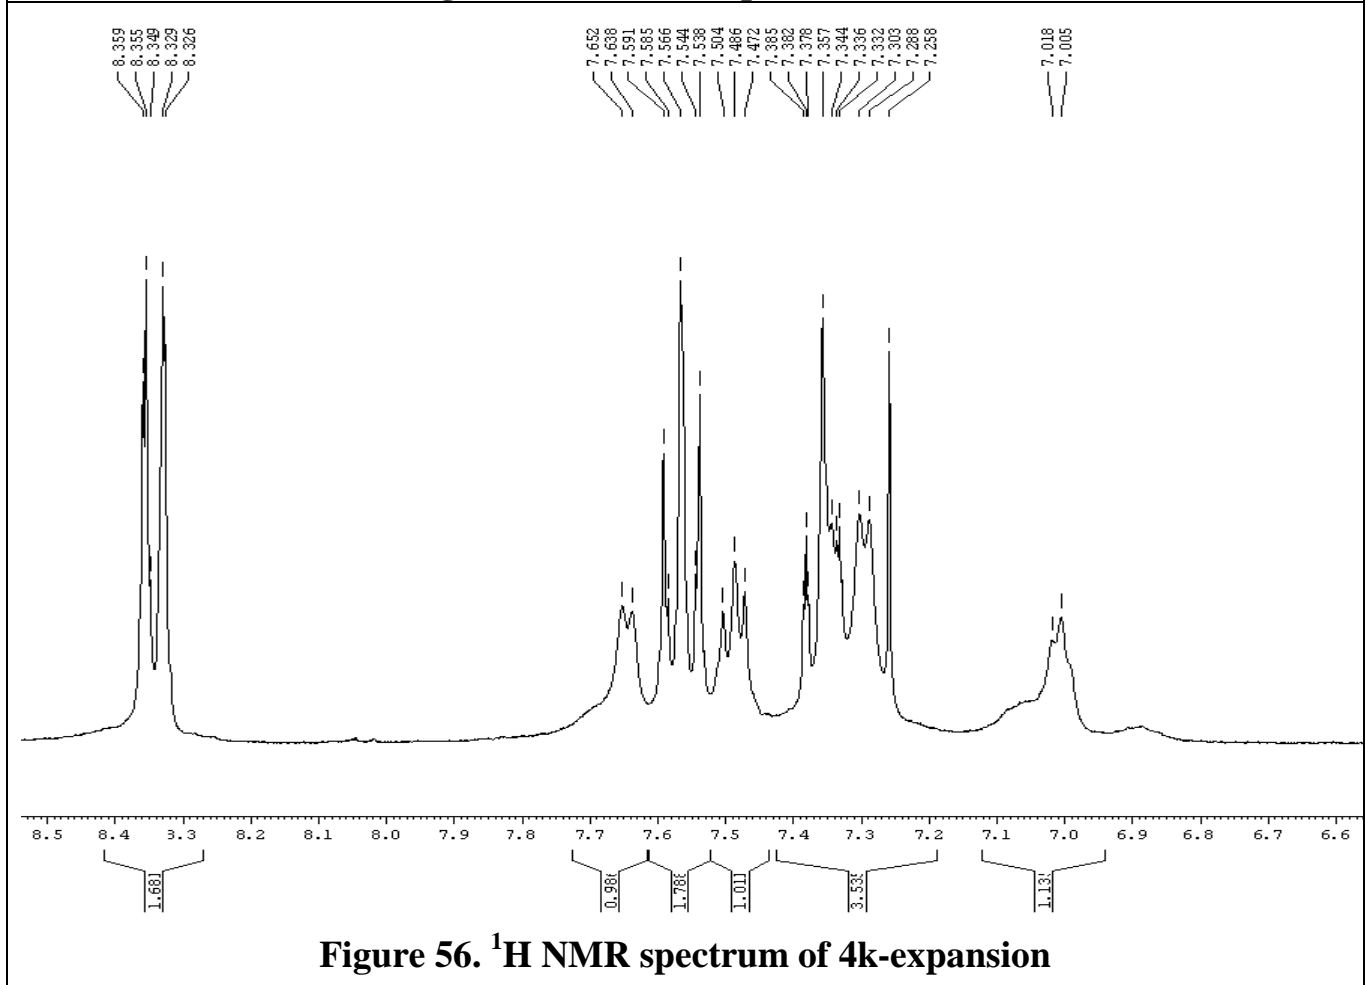

Figure 56. <sup>1</sup>H NMR spectrum of 4k-expansion



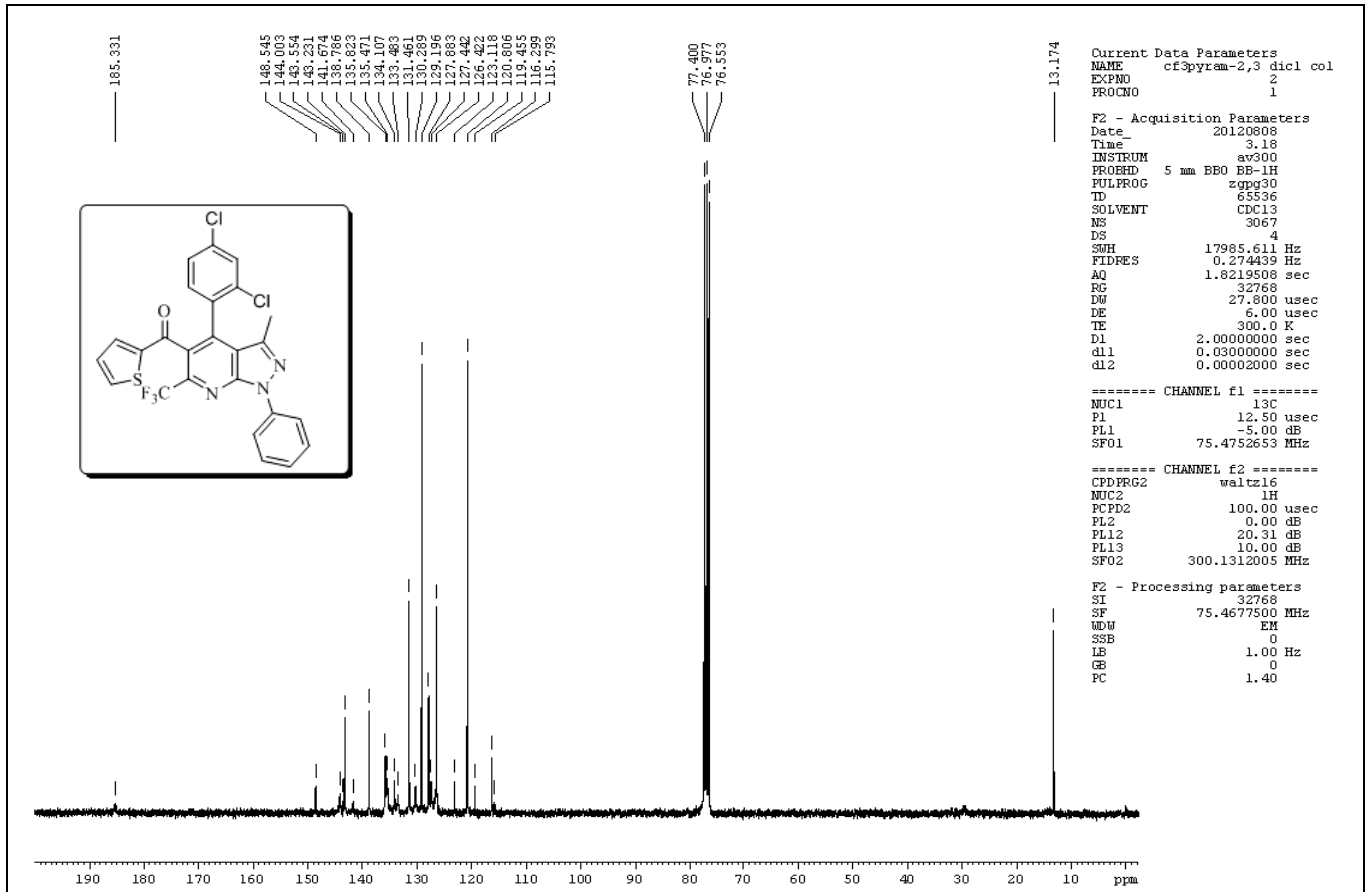

Figure 57. <sup>13</sup>C NMR spectrum of 4k

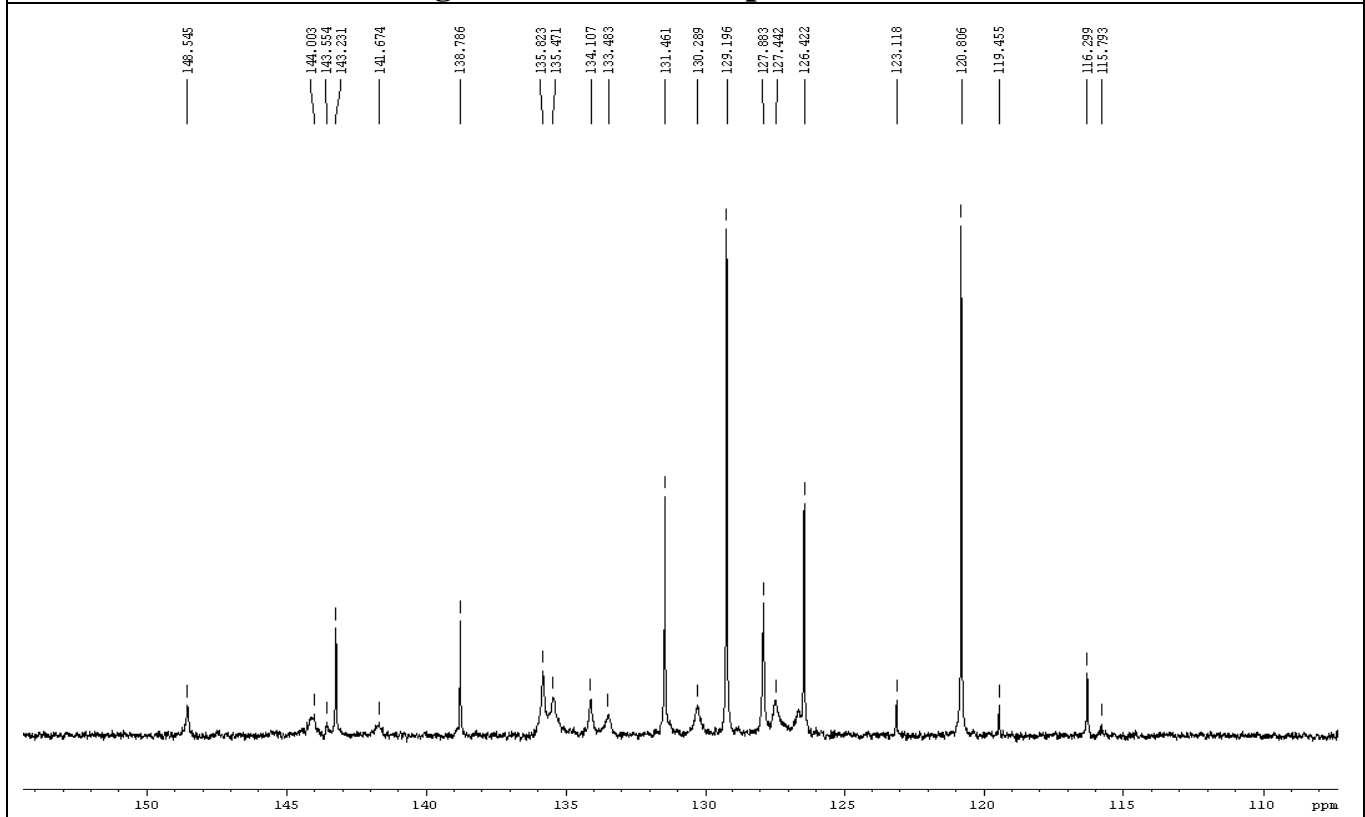

Figure 58. <sup>13</sup>C NMR spectrum of 4k-expansion

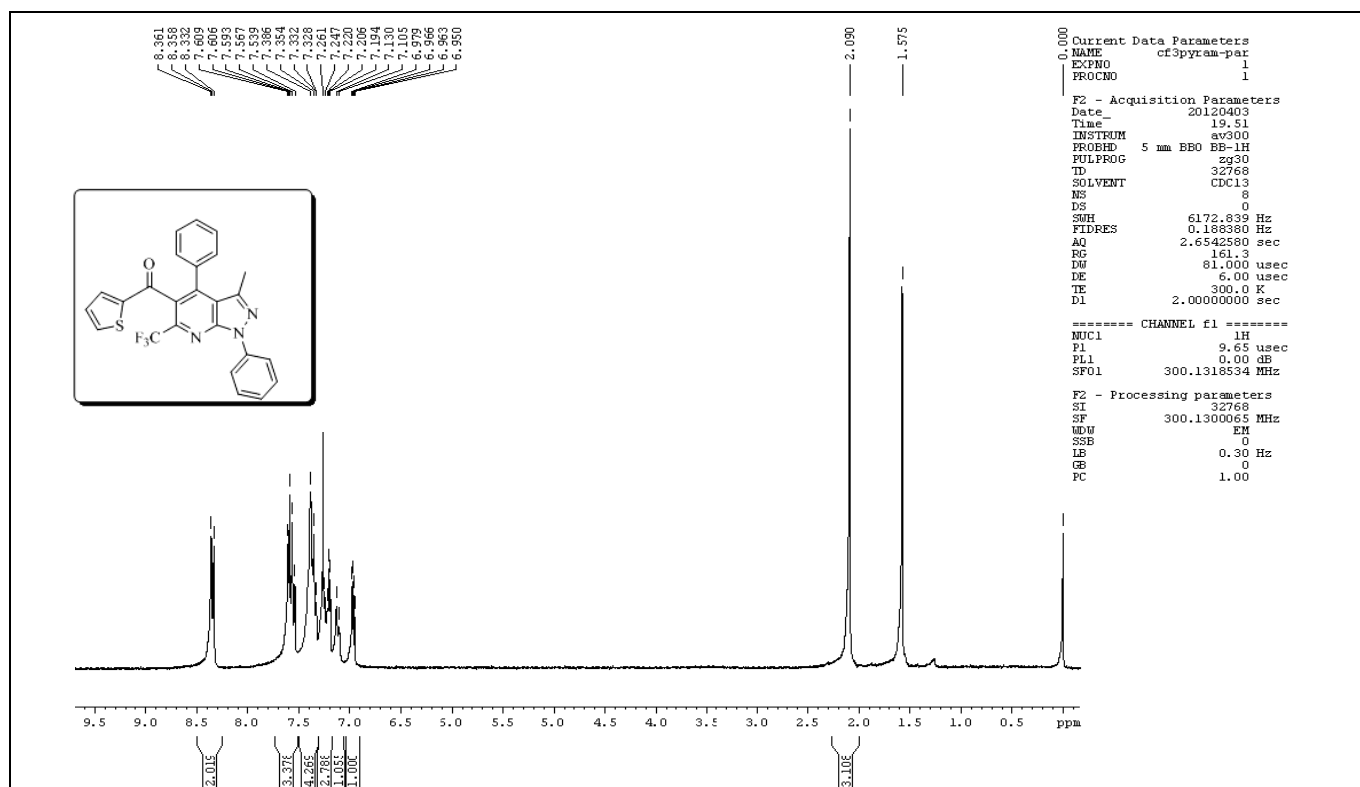

Figure 59.  $^1\text{H}$  NMR spectrum of 4l

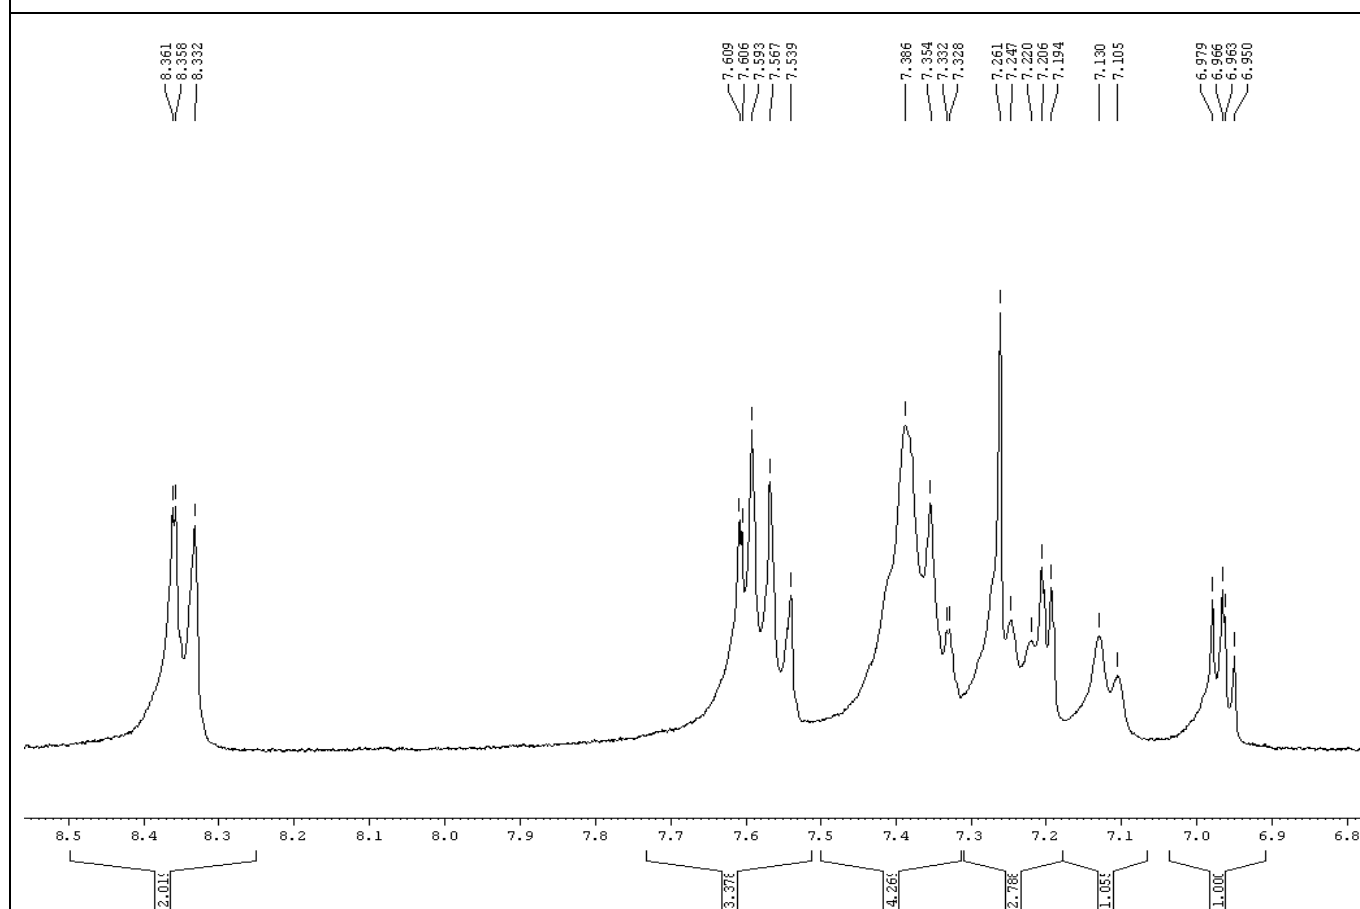

Figure 60.  $^1\text{H}$  NMR spectrum of 4l-expansion

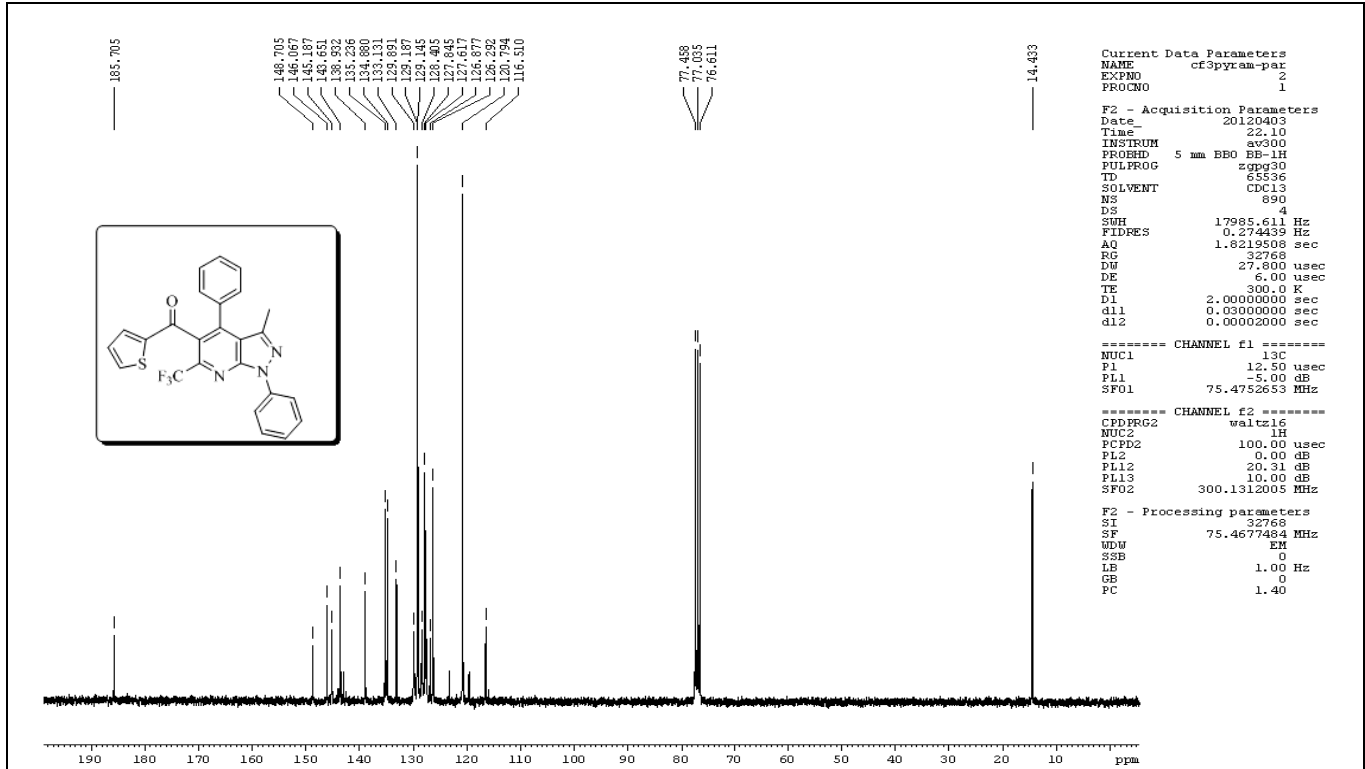

Figure 61. <sup>13</sup>C NMR spectrum of 4l

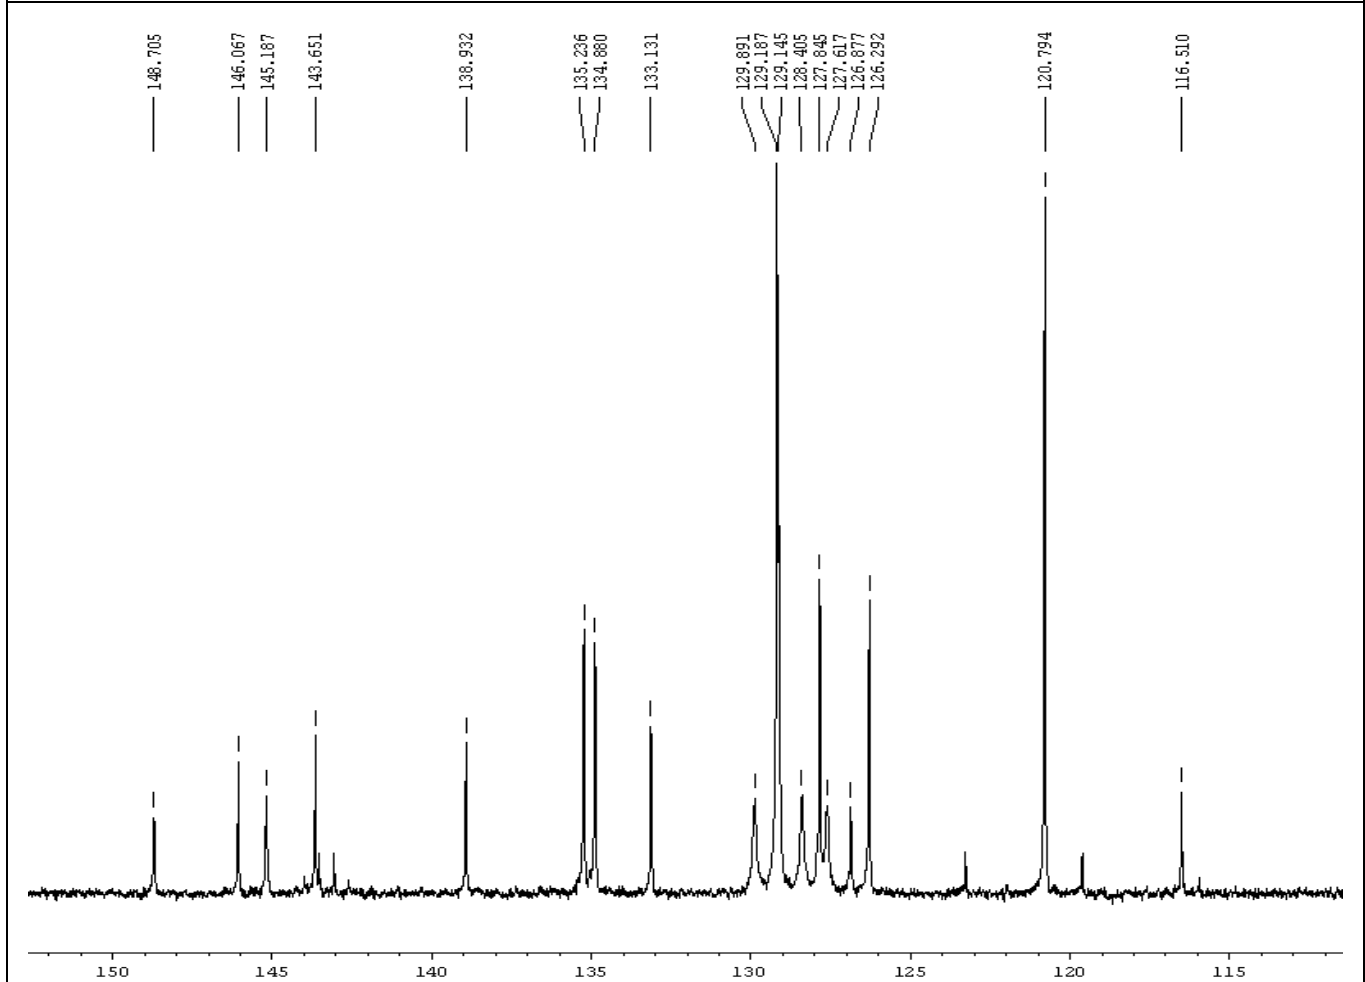

Figure 62. <sup>13</sup>C NMR spectrum of 4l-expansion

Q4\_121026172426 #45 RT: 0.77 AV: 1 NL: 9.17E3  
T: ITMS + c ESI Full ms [100.00-1000.00]

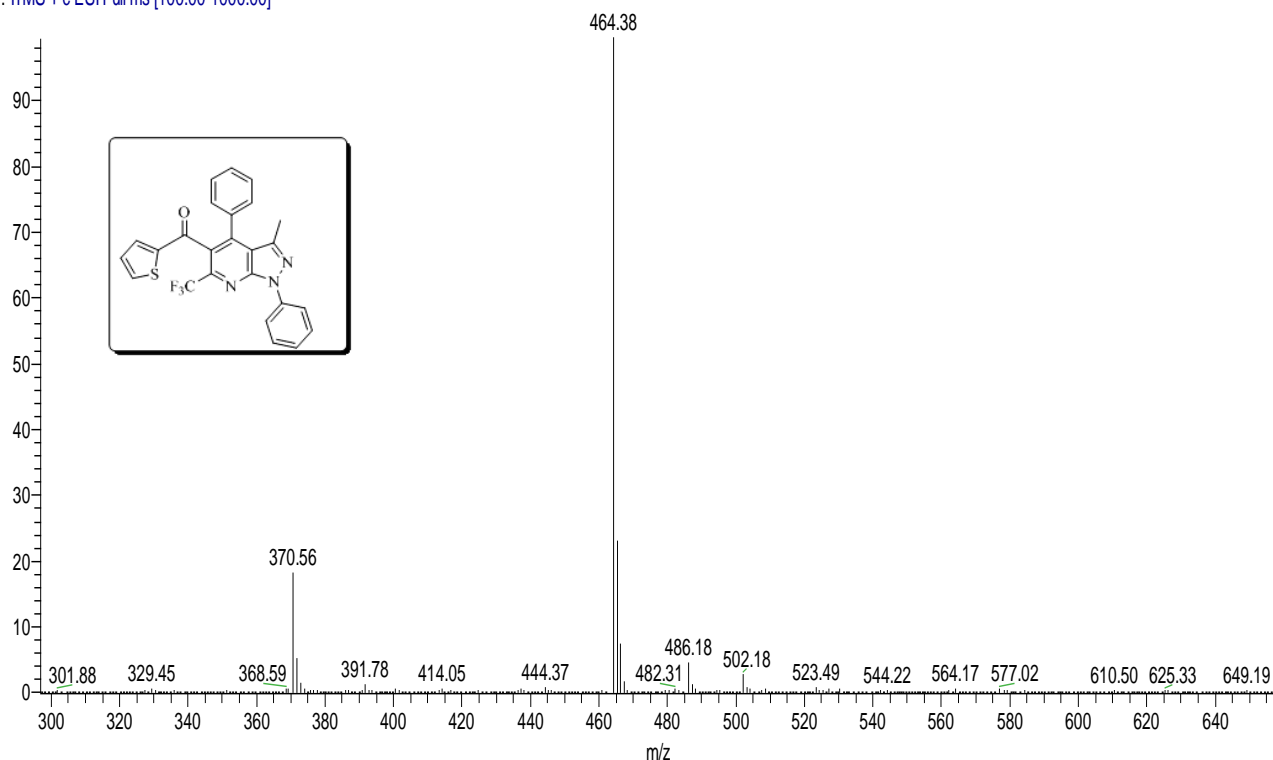

Figure 63. Mass spectrum of 4l

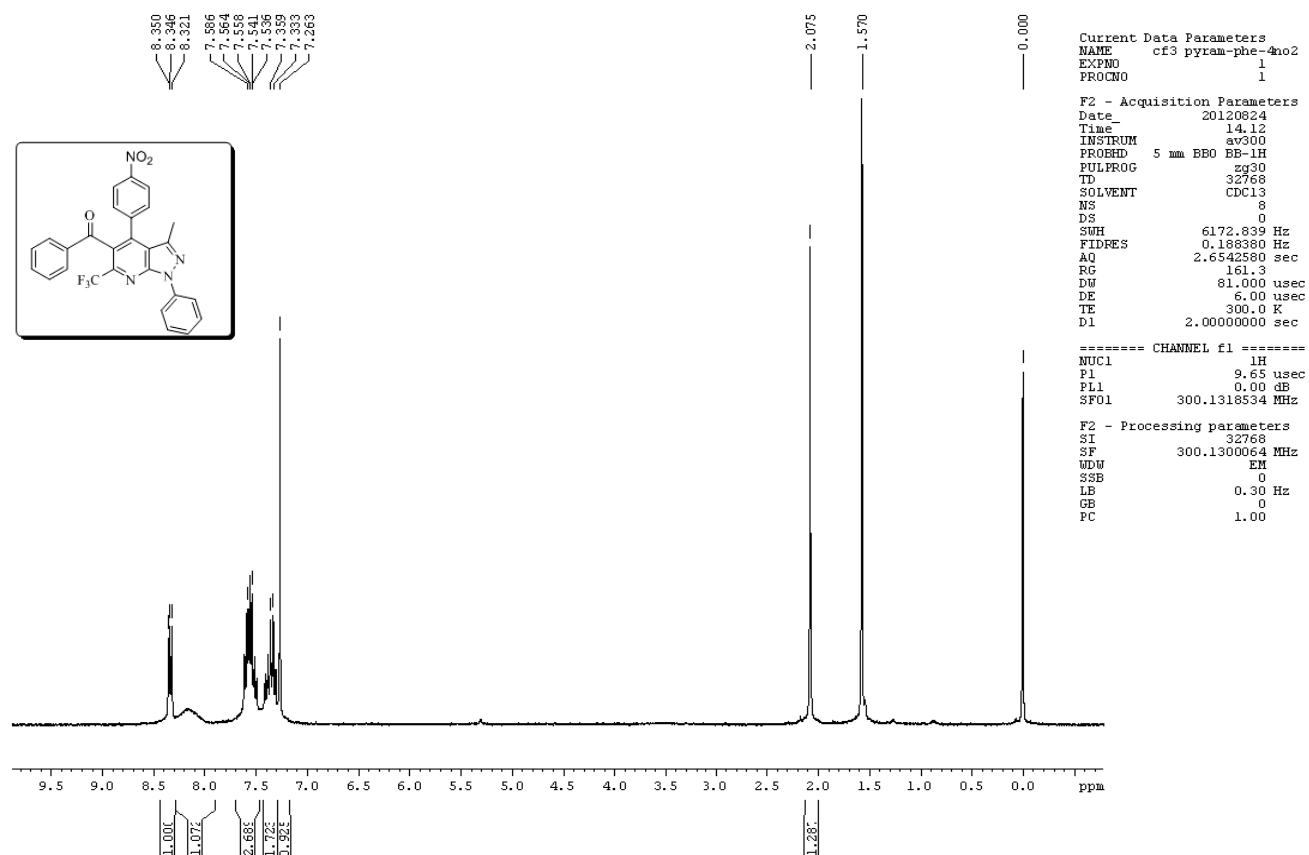

Figure 64. <sup>1</sup>H NMR spectrum of 4m

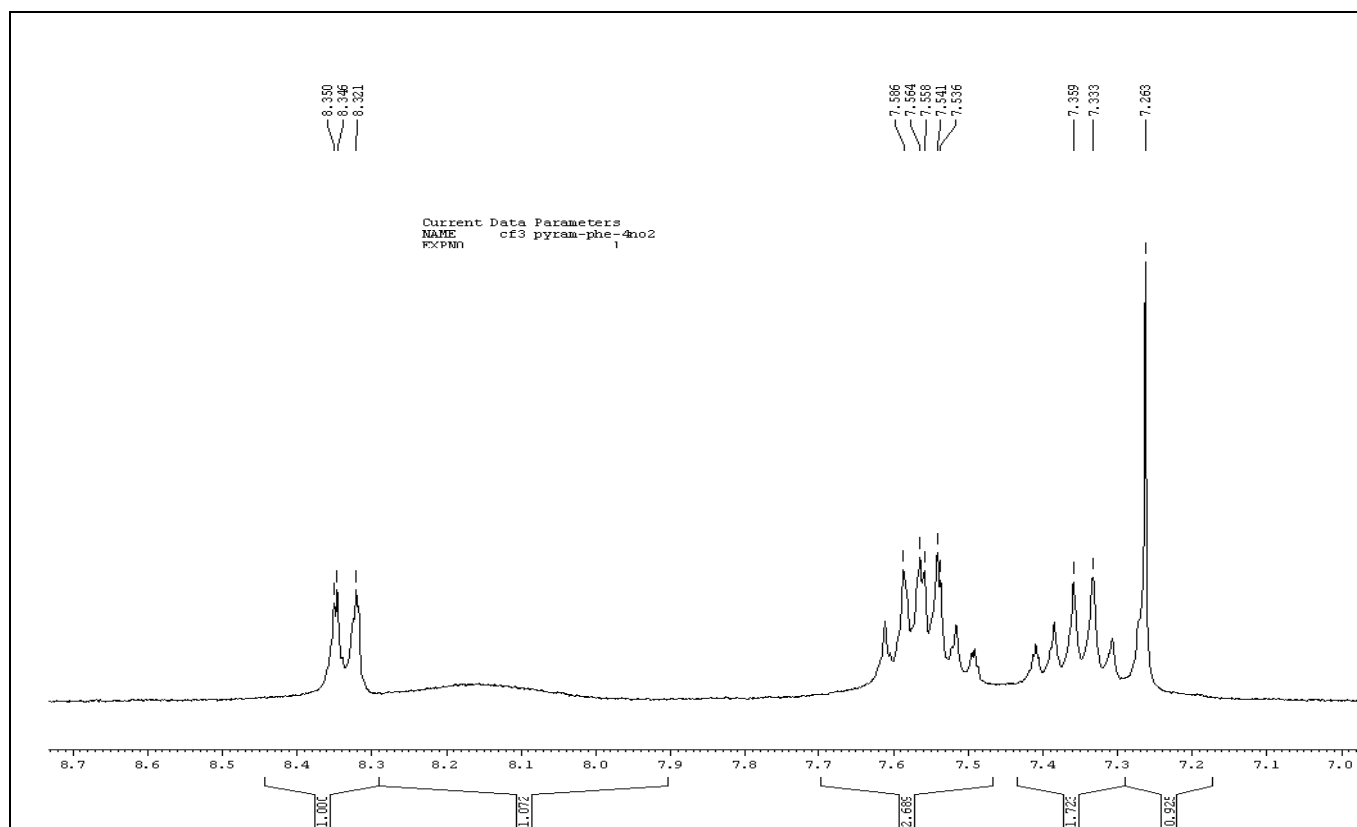

Figure 65.  $^1\text{H}$  NMR spectrum of 4m-expansion

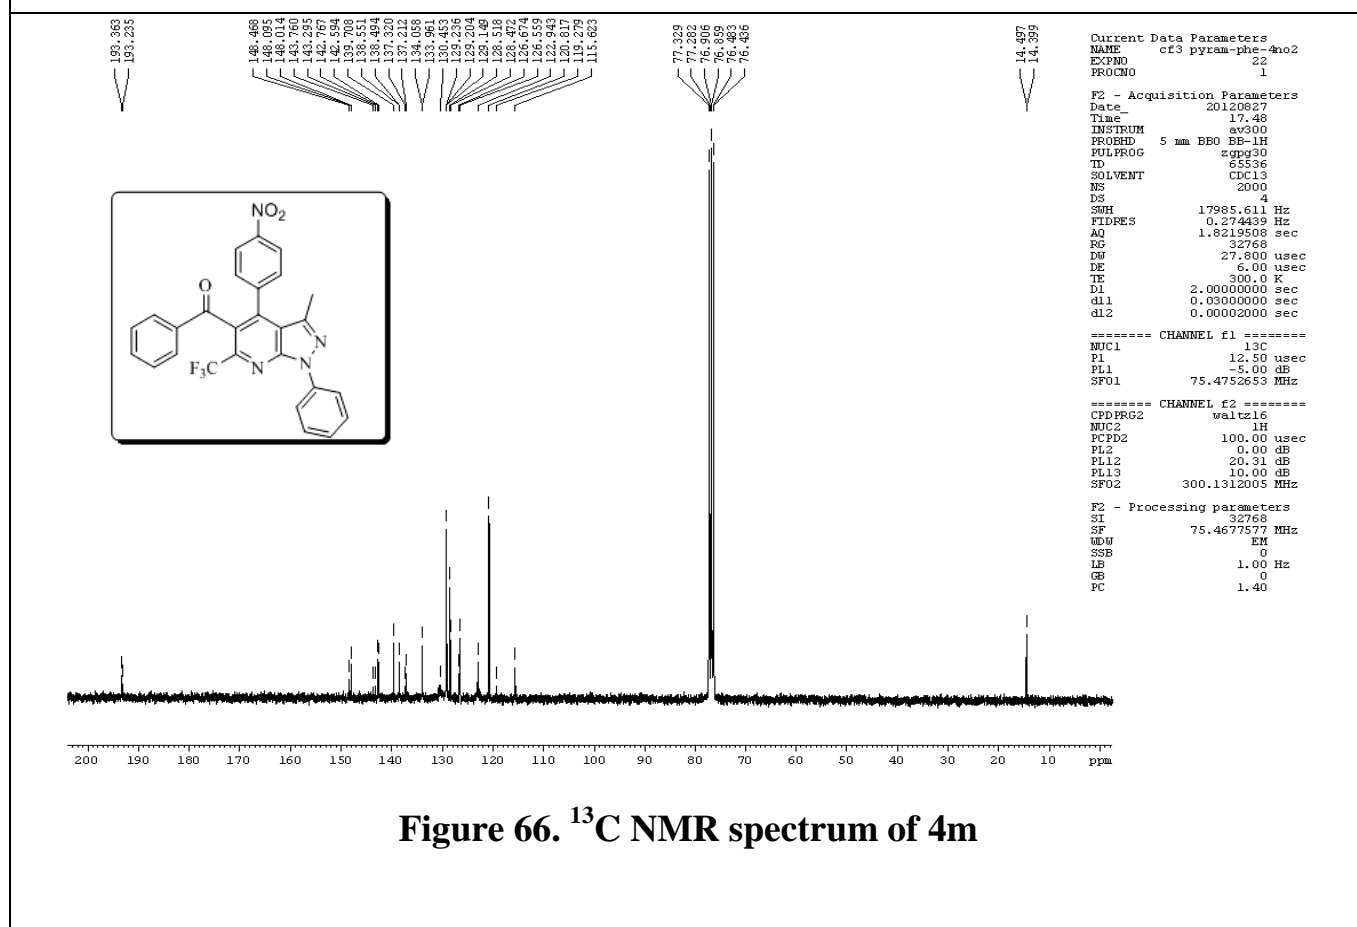

Figure 66.  $^{13}\text{C}$  NMR spectrum of 4m

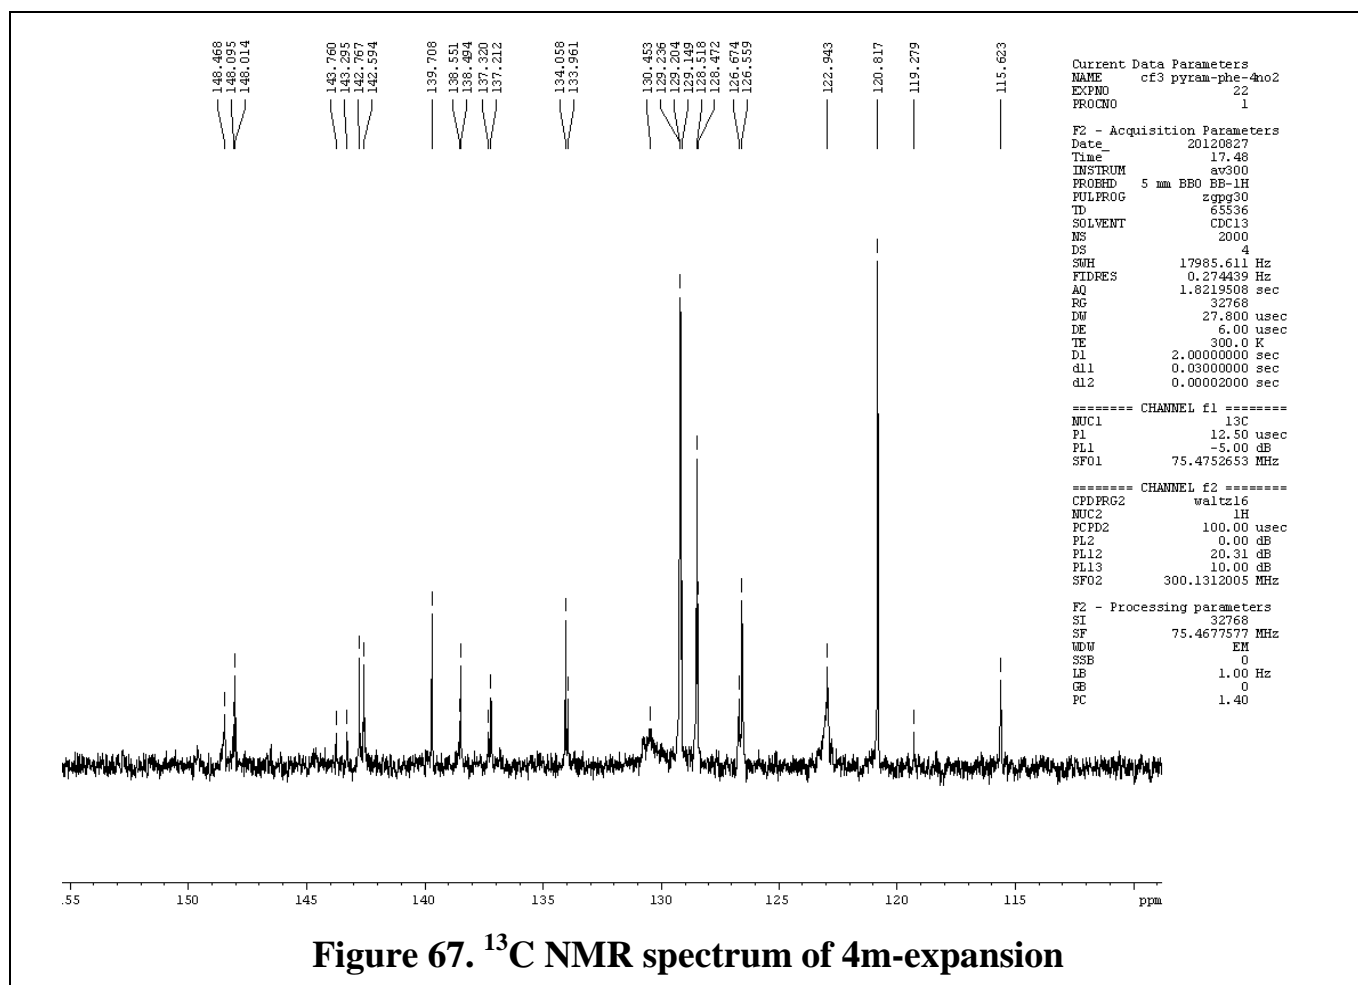

Q13\_121026172426 #36 RT: 0.62 AV: 1 NL: 5.04E3  
T: ITMS + c ESI Full ms [100.00-1000.00]

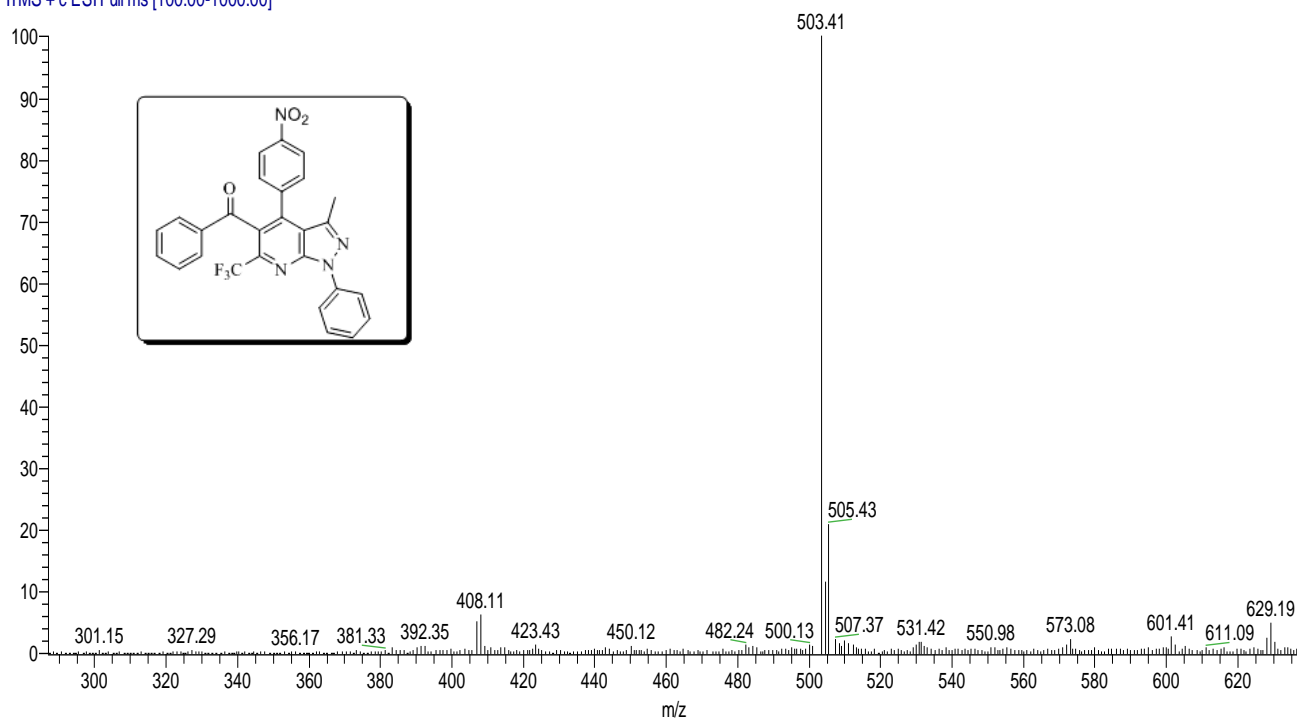

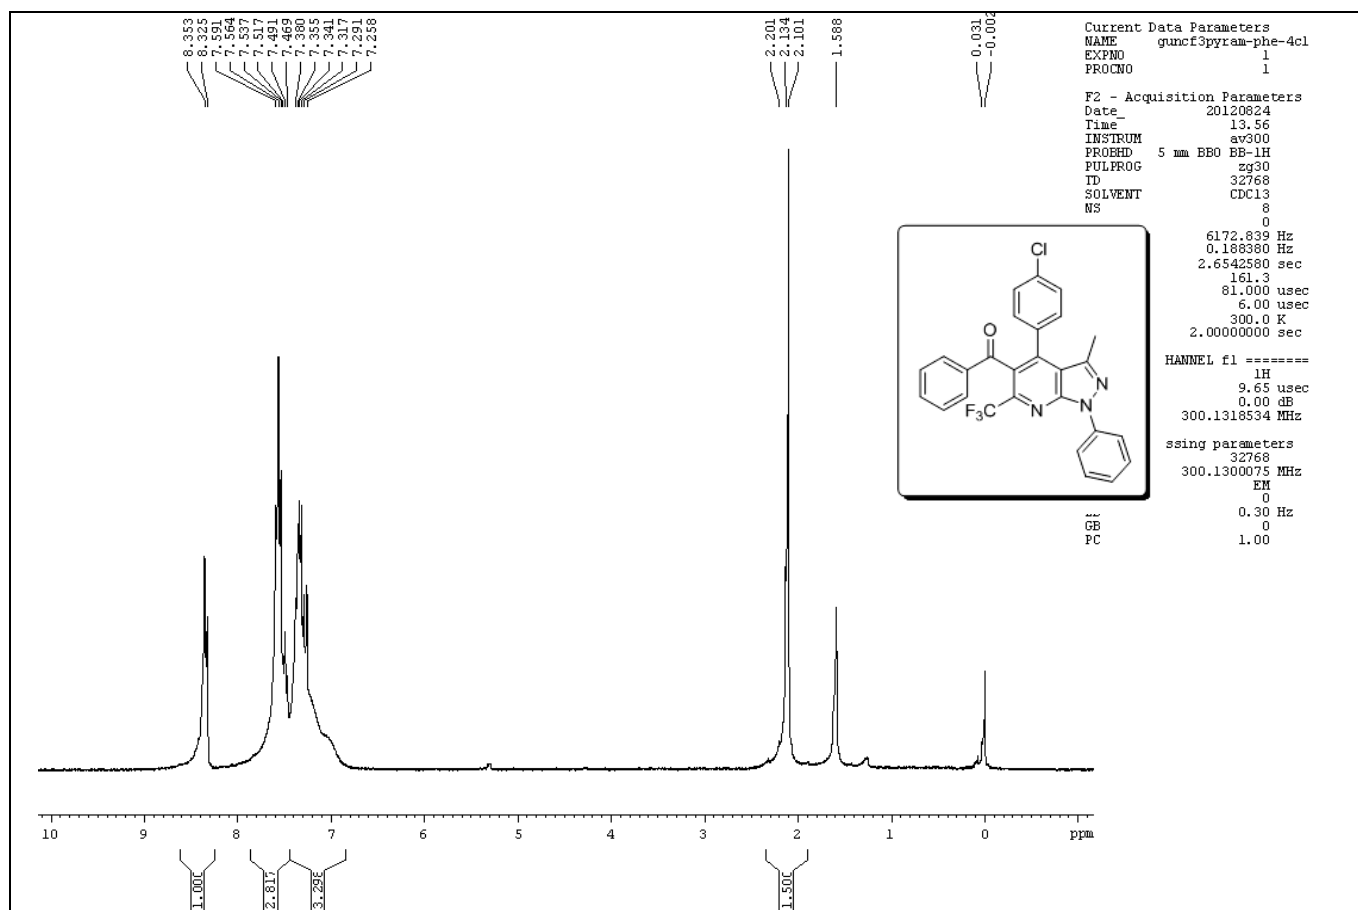

Figure 69. <sup>1</sup>H NMR spectrum of 4n

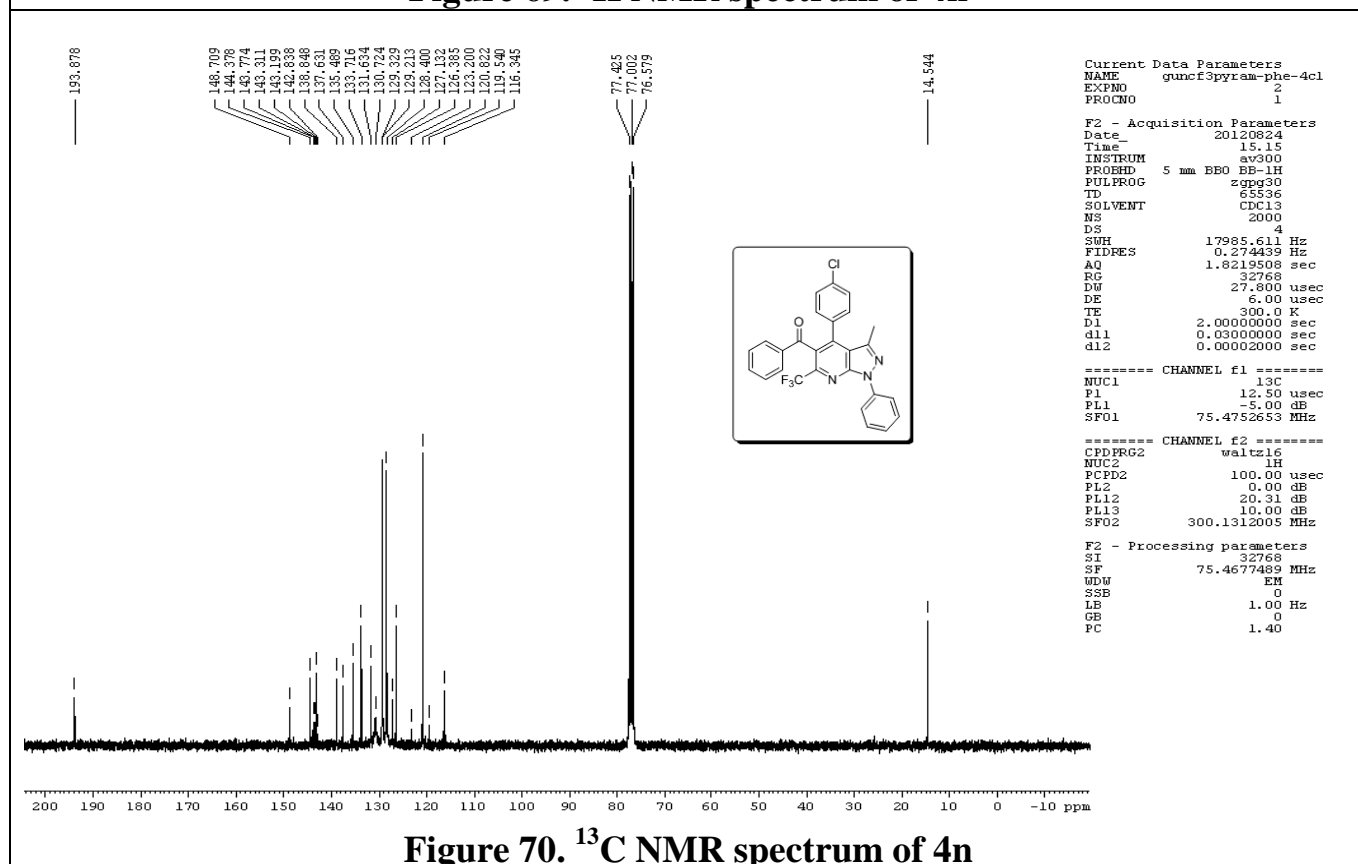

Figure 70. <sup>13</sup>C NMR spectrum of 4n

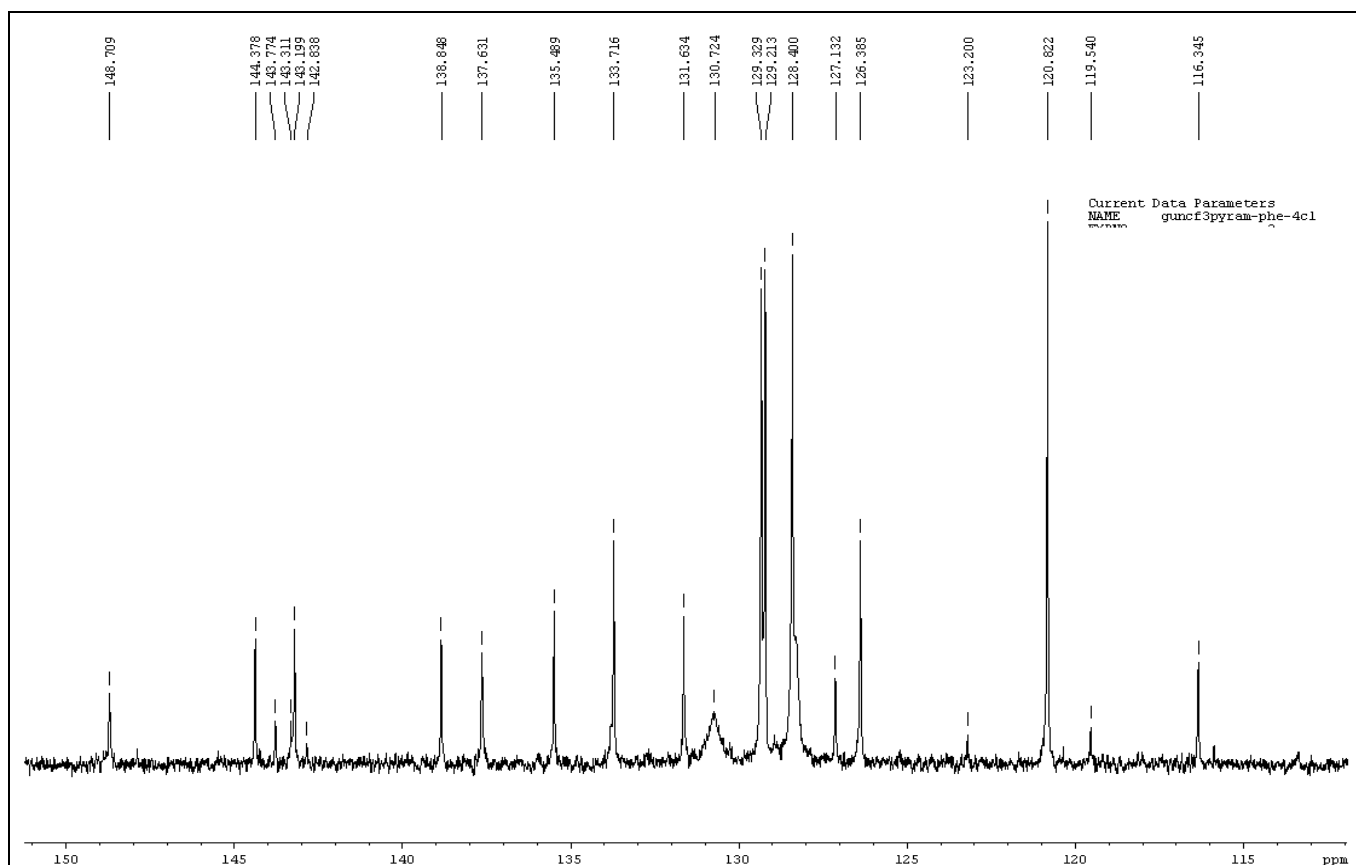

**Figure 71.**  $^{13}\text{C}$  NMR spectrum of 4n-expansion

Q7\_121026172426 #53 RT: 0.92 AV: 1 NL: 8.53E2  
T: ITMS + c ESI Full ms [100.00-1000.00]

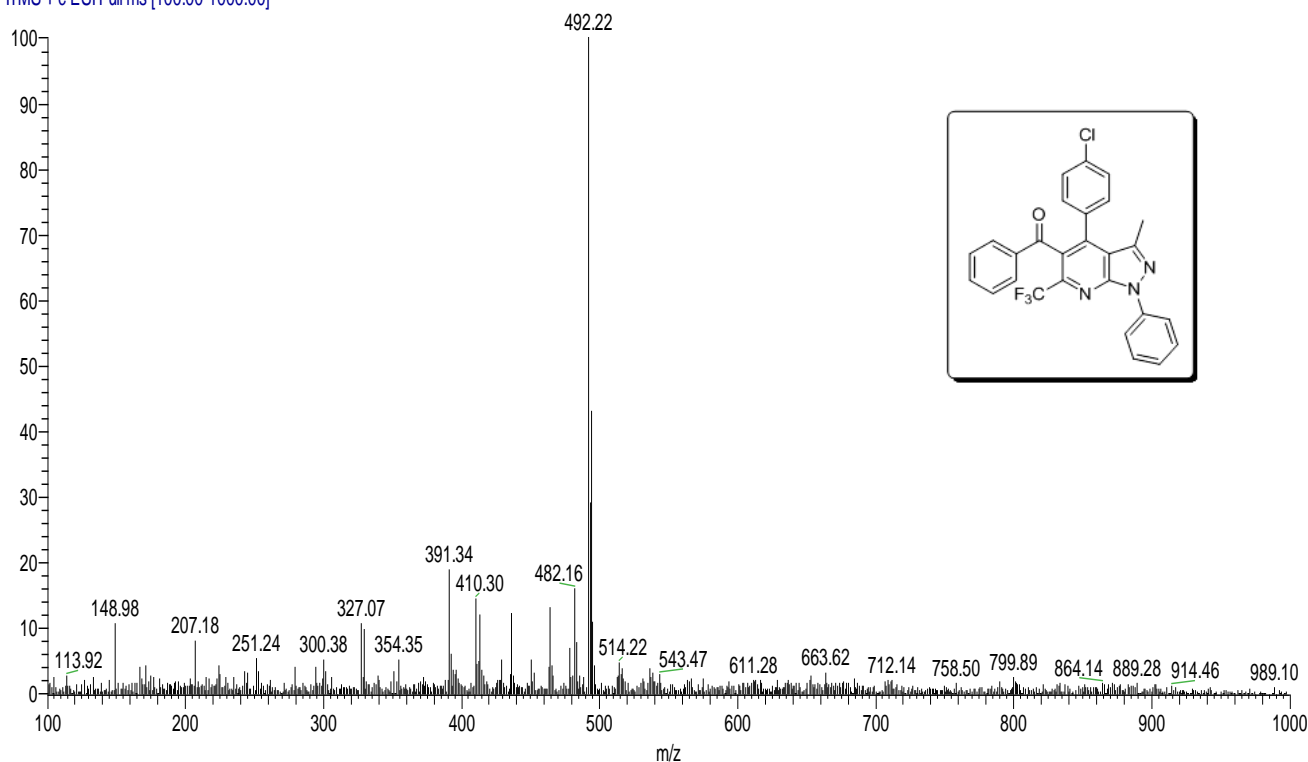

**Figure 72.** Mass spectrum of 4n



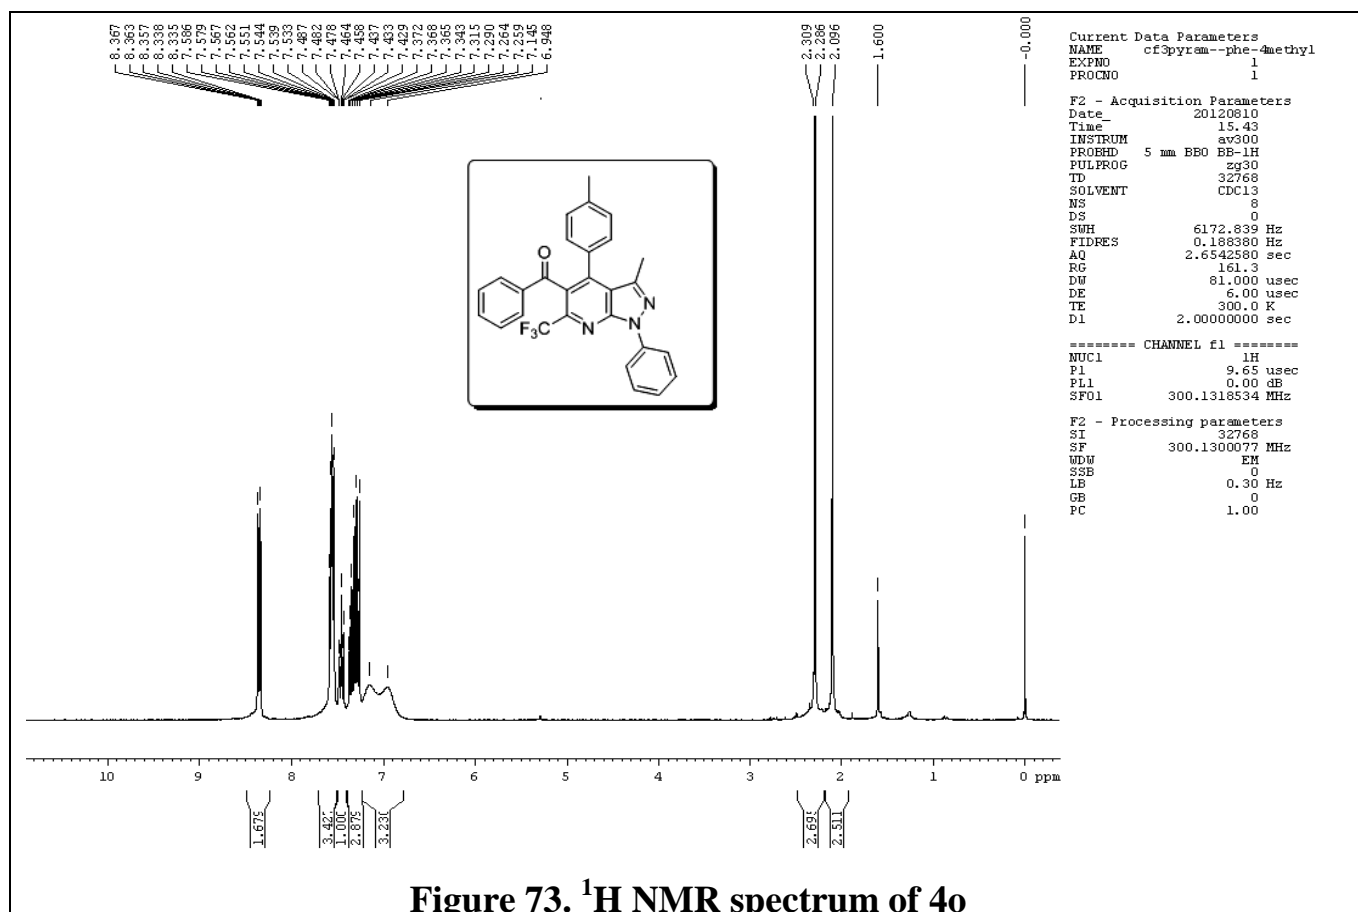

Figure 73. <sup>1</sup>H NMR spectrum of 40

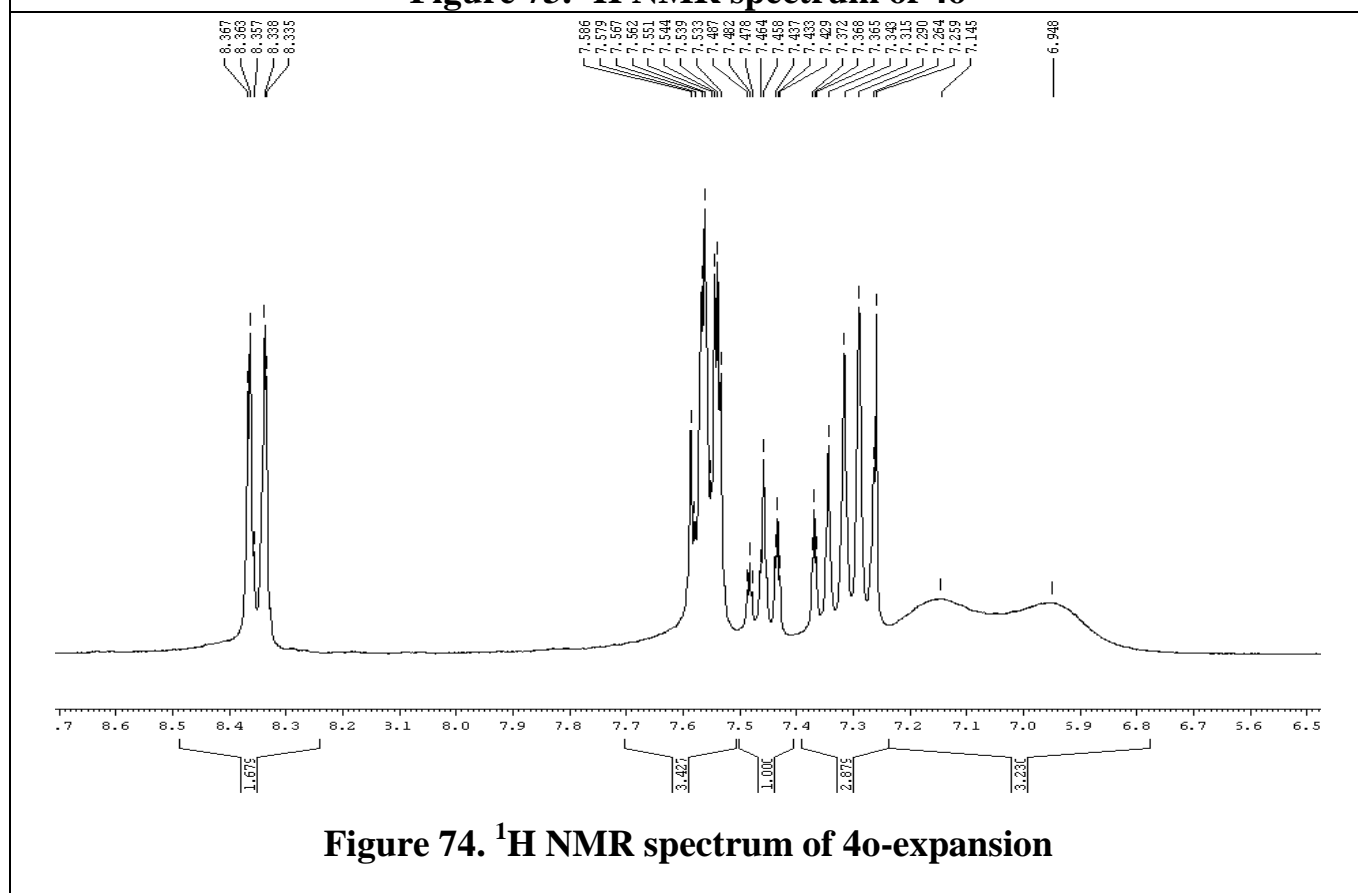

Figure 74. <sup>1</sup>H NMR spectrum of 40-expansion

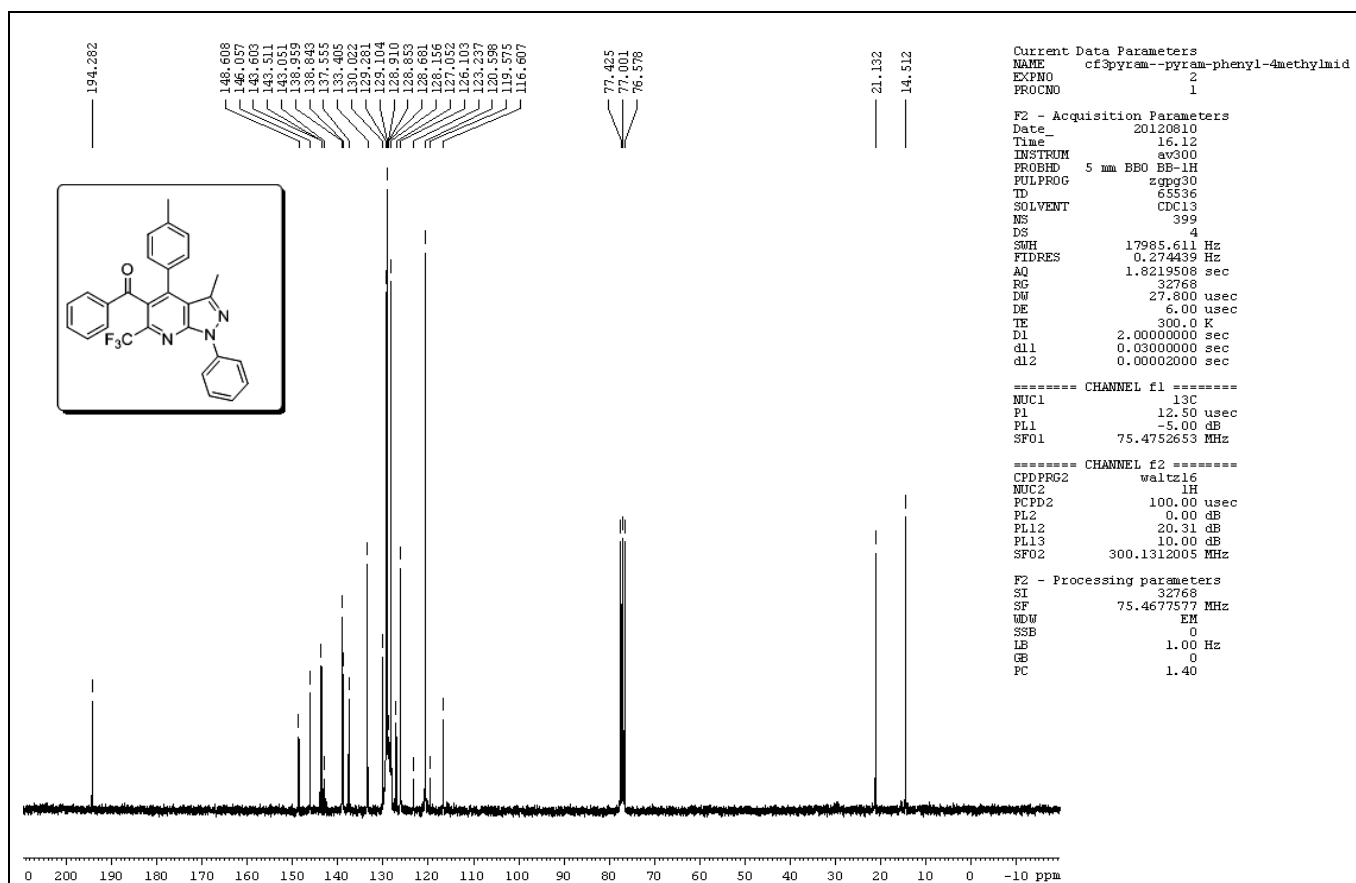

Figure 75. <sup>13</sup>C NMR spectrum of 4o

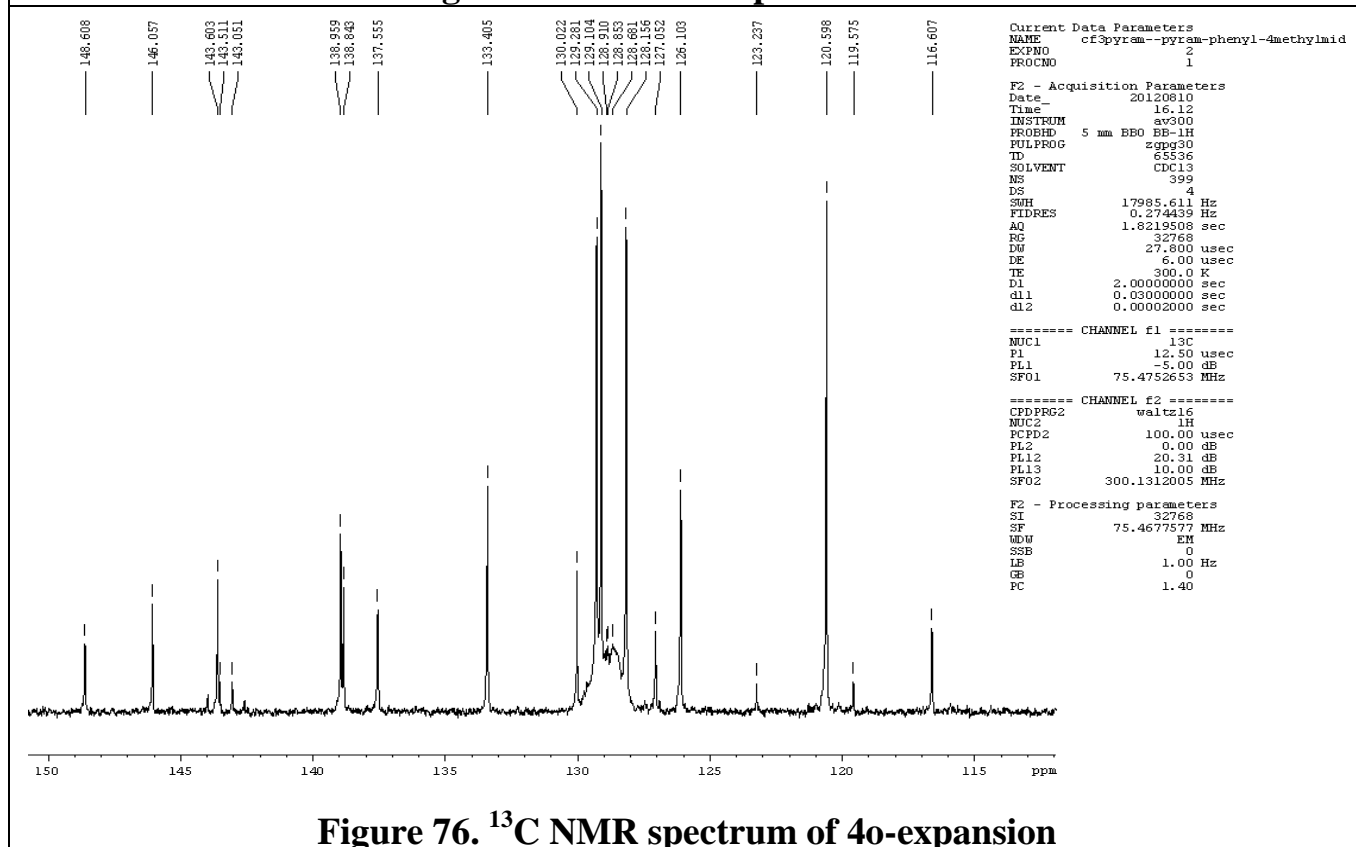

Figure 76. <sup>13</sup>C NMR spectrum of 4o-expansion

Q8\_121026172426 #31 RT: 0.52 AV: 1 NL: 3.49E3  
T: ITMS + c ESI Full ms [100.00-1000.00]

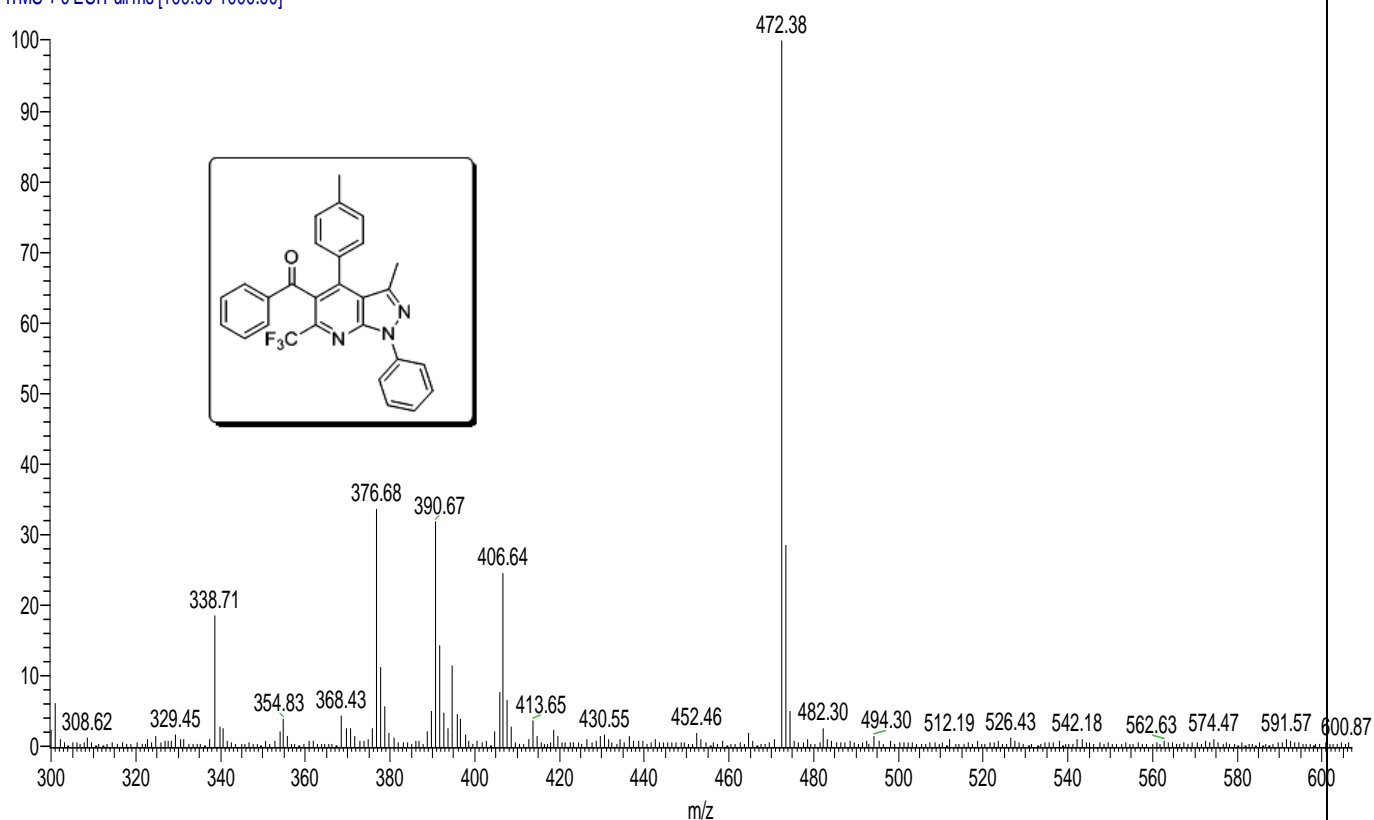

Figure 77. Mass spectrum of 4o

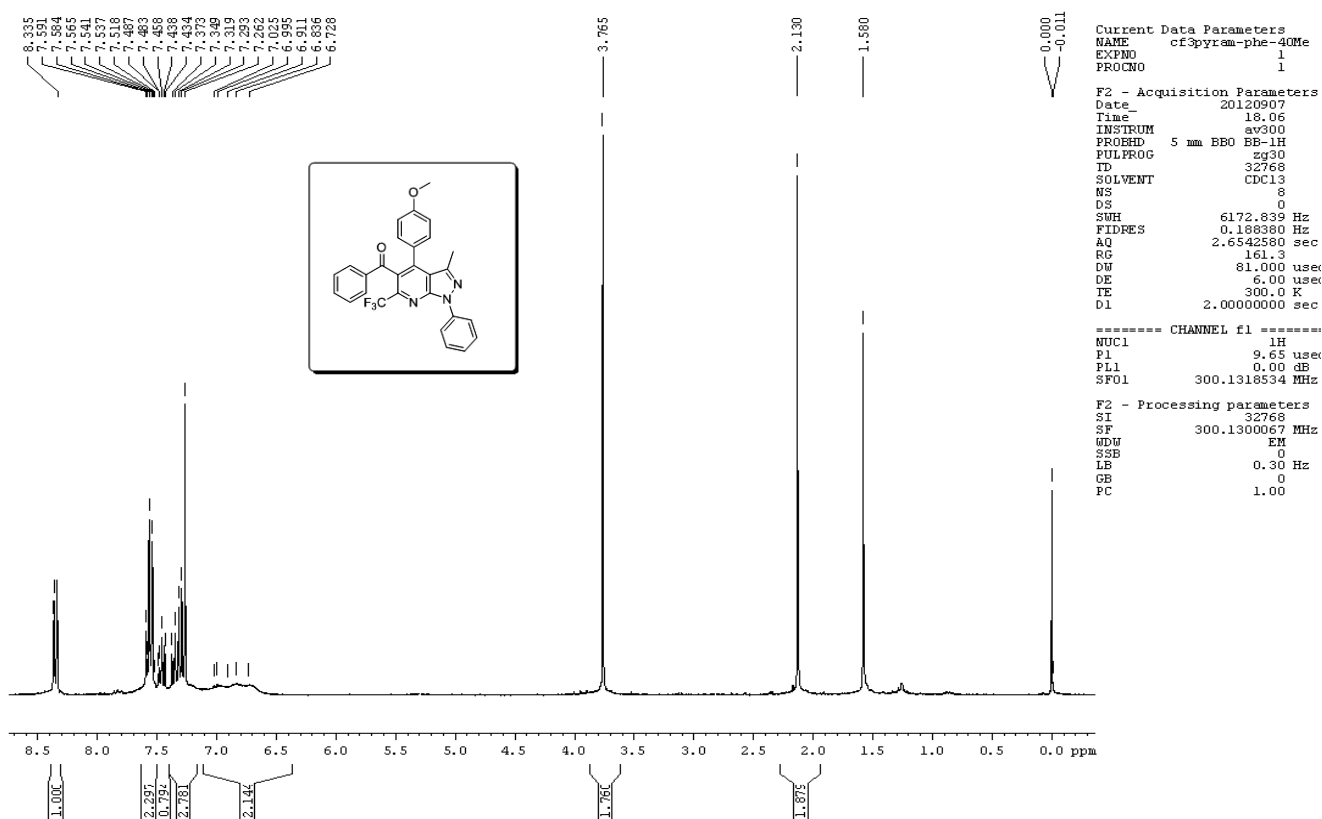

Figure 78. <sup>1</sup>H NMR spectrum of 4p

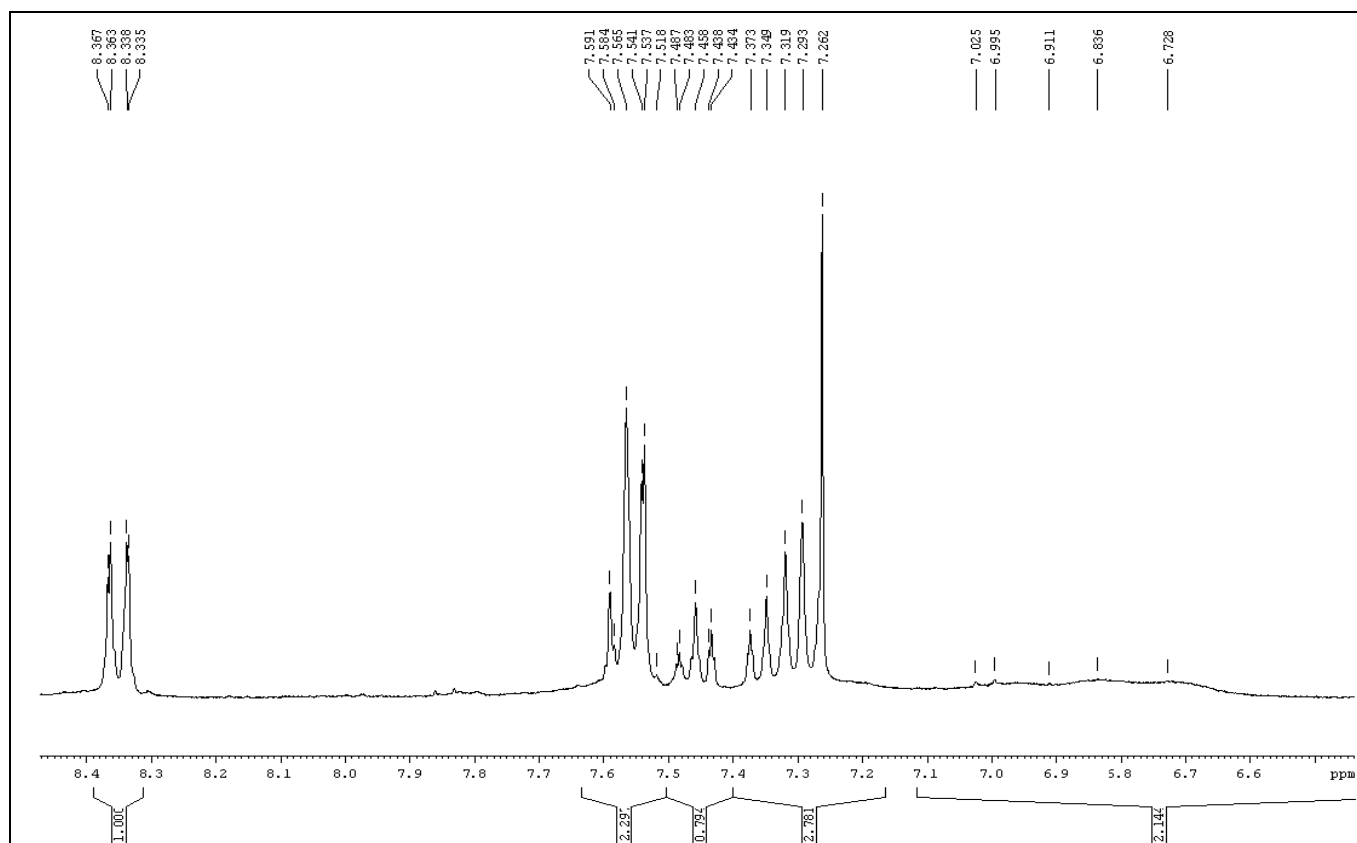

Figure 79.  $^1\text{H}$  NMR spectrum of 4p-expansion

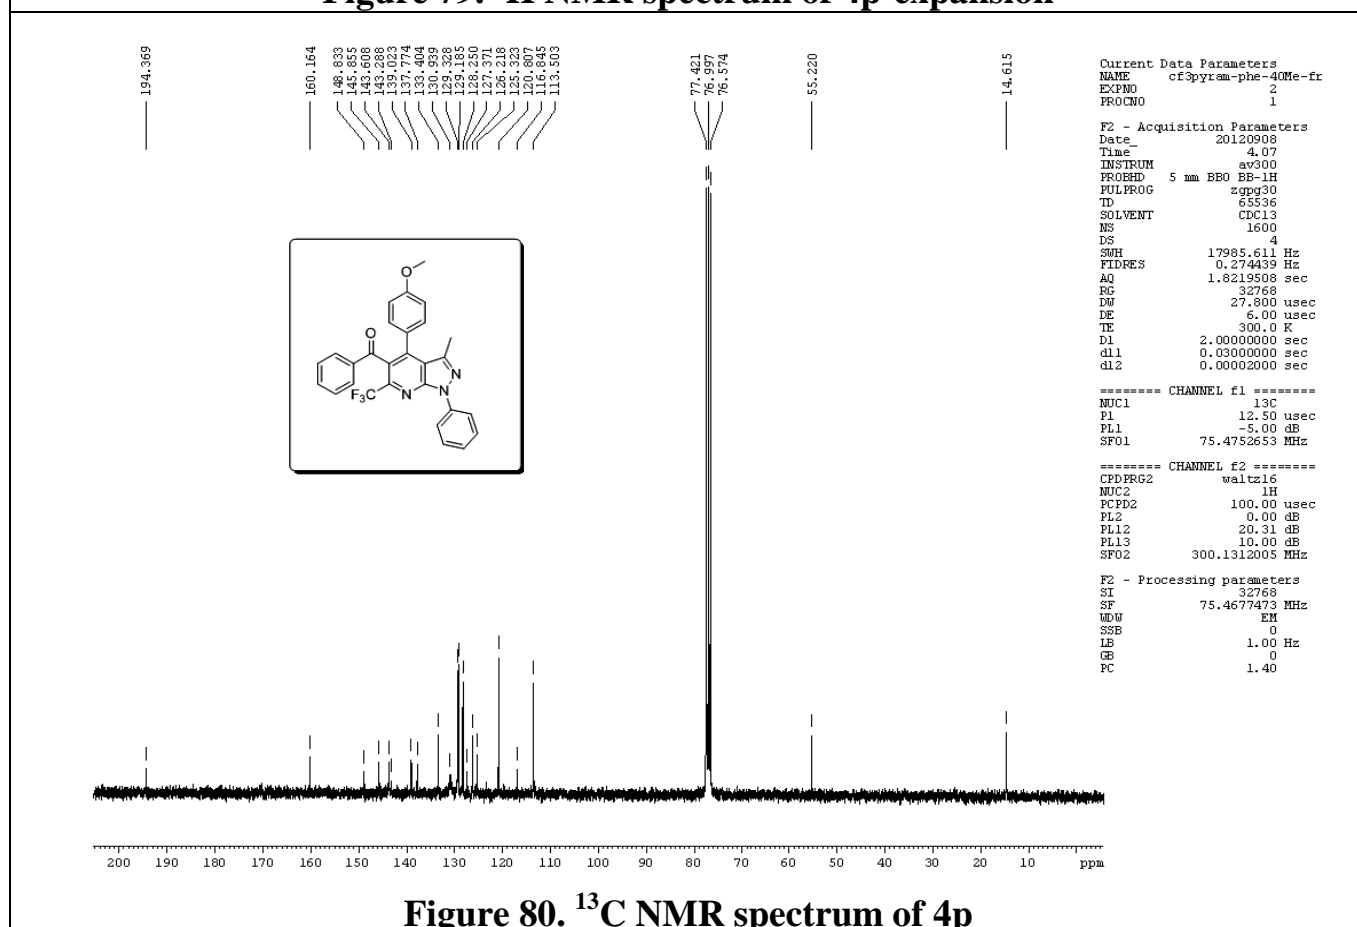

Figure 80.  $^{13}\text{C}$  NMR spectrum of 4p

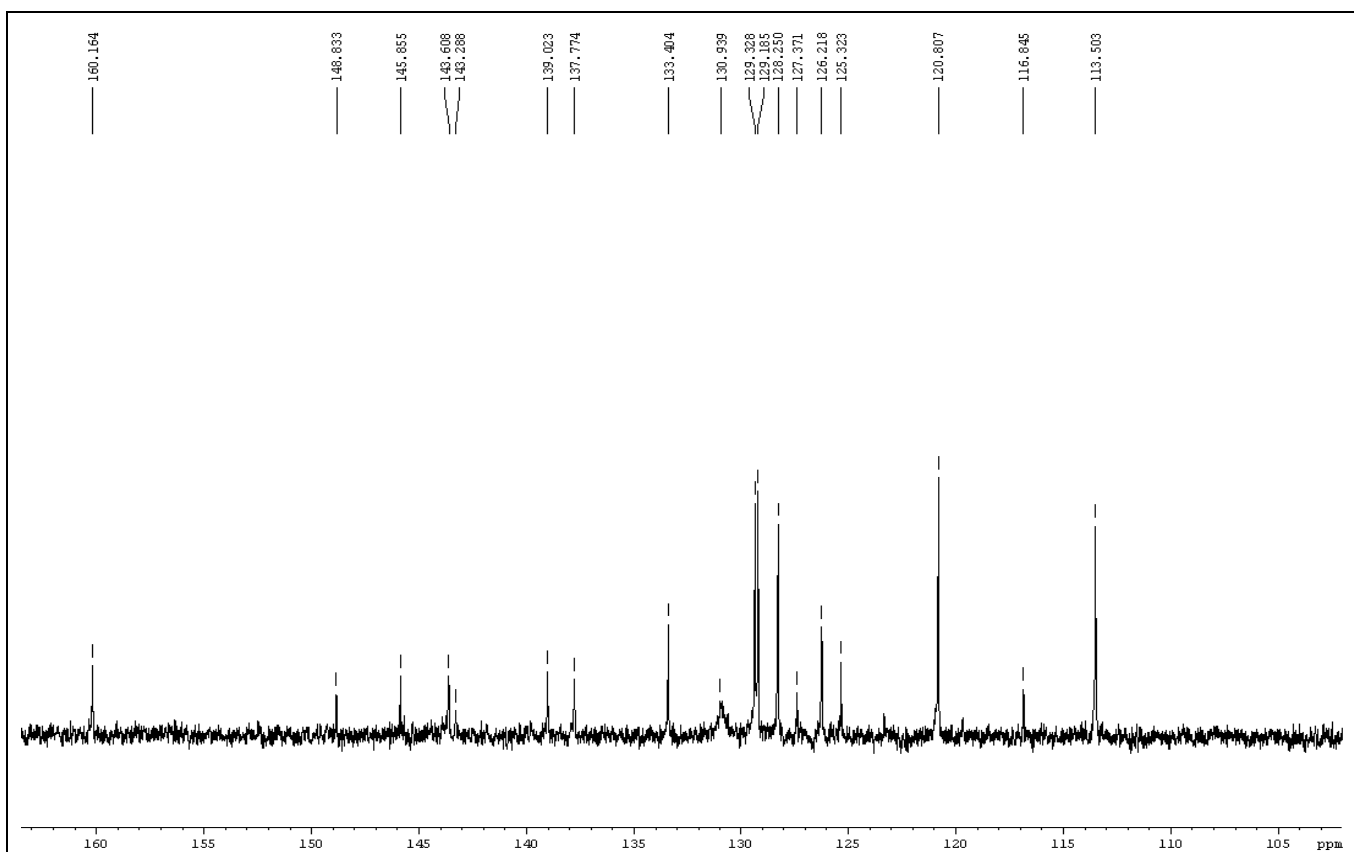

**Figure 81.**  $^{13}\text{C}$  NMR spectrum of 4p-expansion

Q16\_121026172426 #38 RT: 0.65 AV: 1 NL: 4.22E3  
T: ITMS + c ESI Full ms [100.00-1000.00]

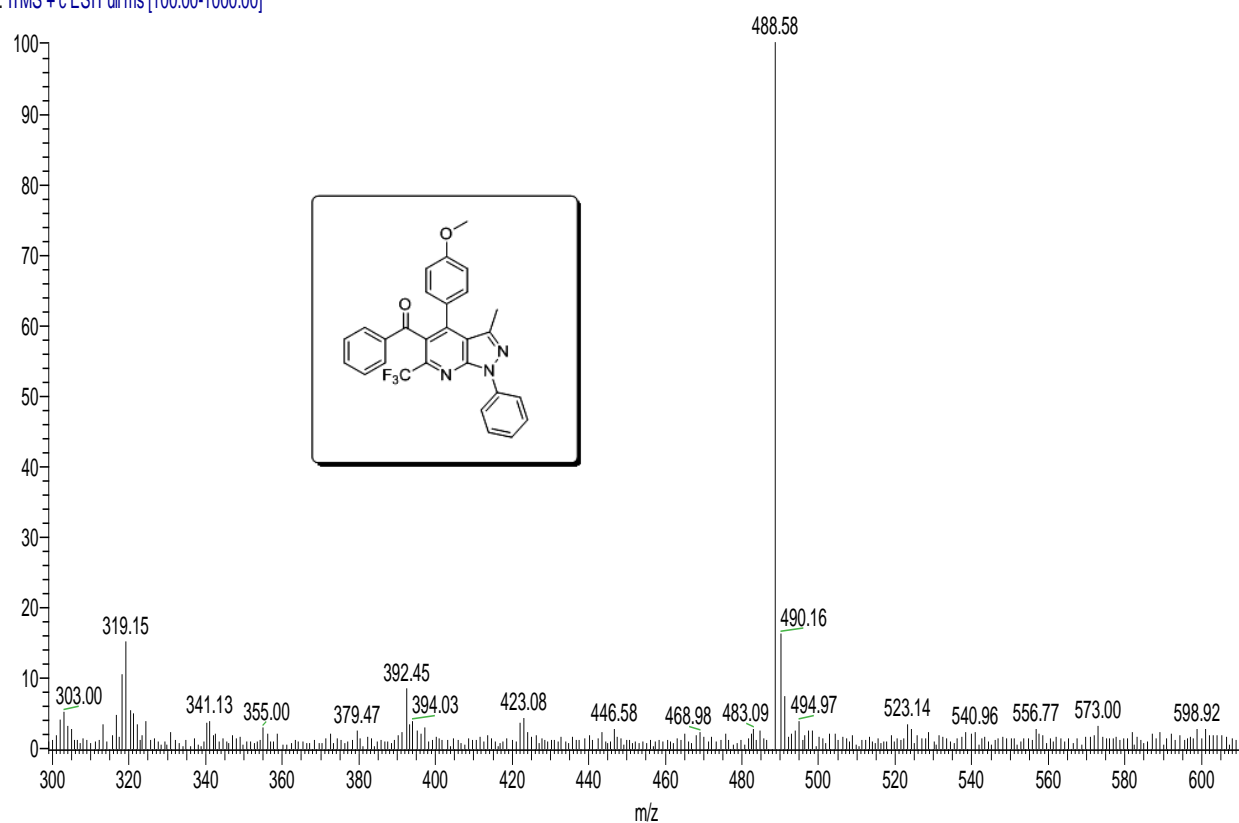

**Figure 82.** Mass spectrum of 4p

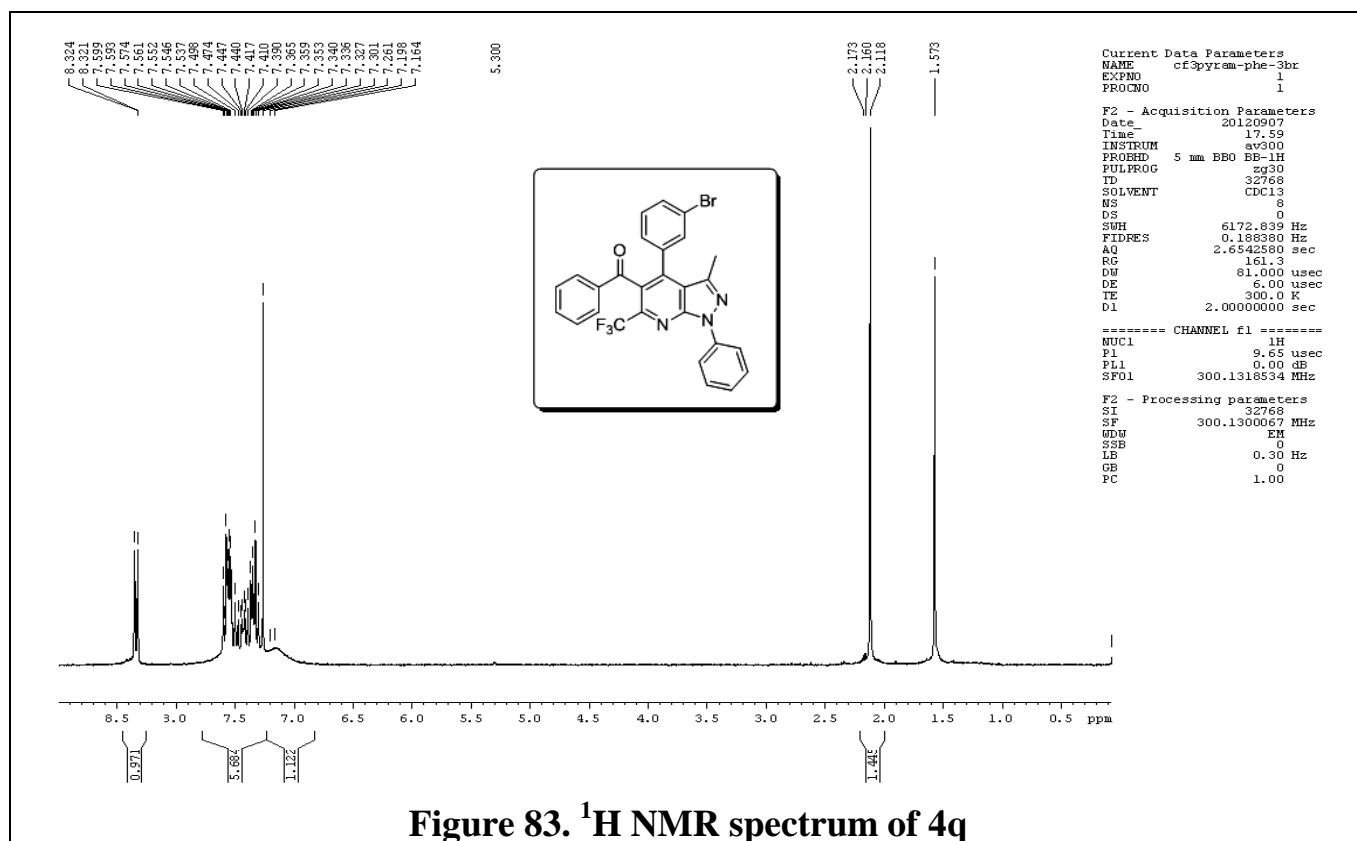

Figure 83. <sup>1</sup>H NMR spectrum of 4q

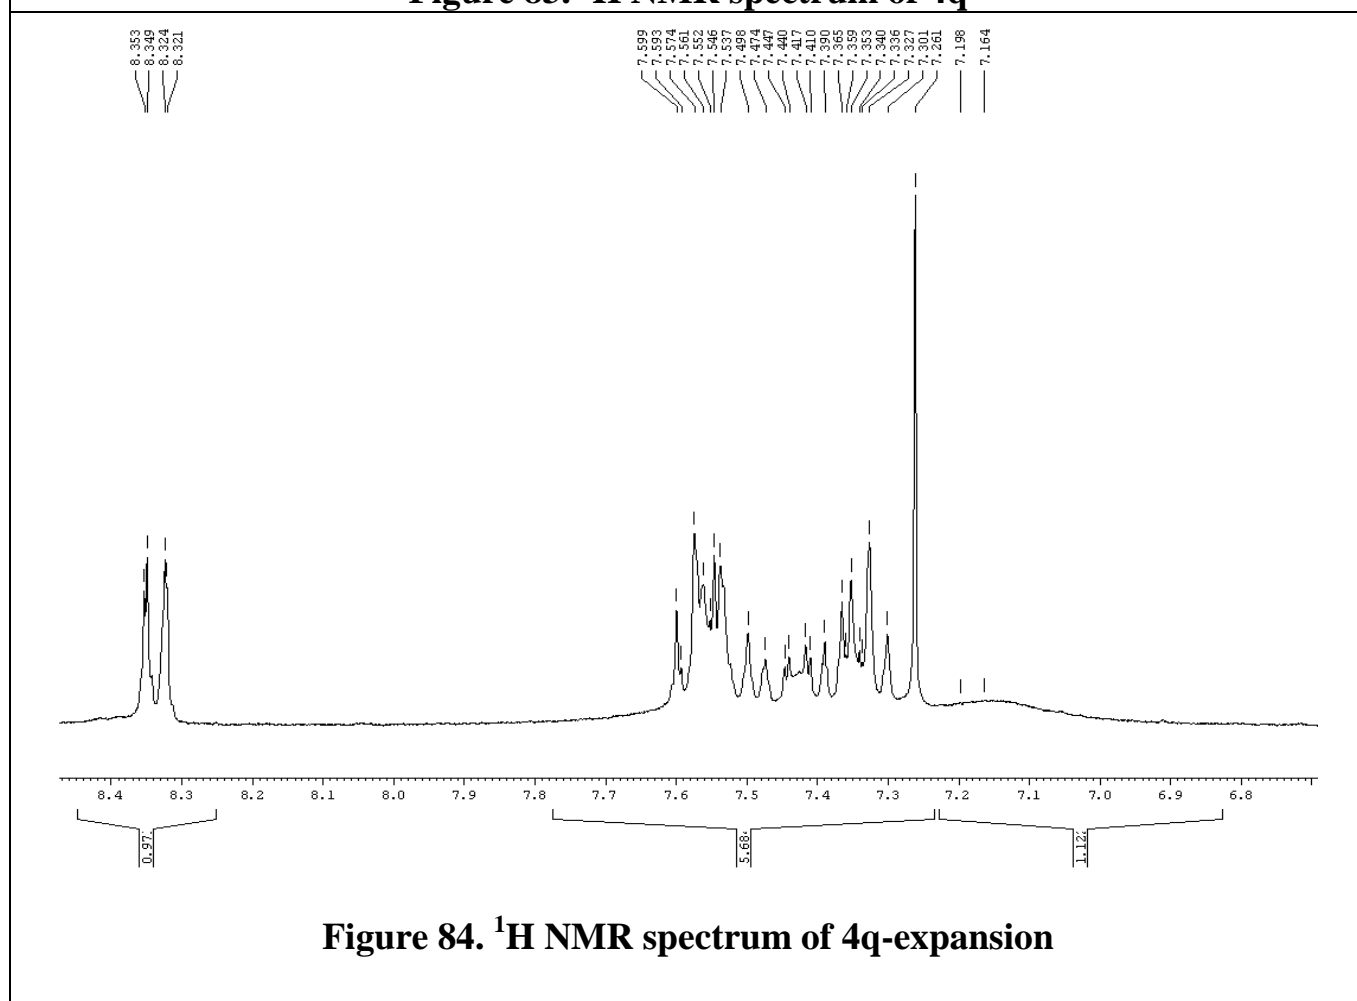

Figure 84. <sup>1</sup>H NMR spectrum of 4q-expansion

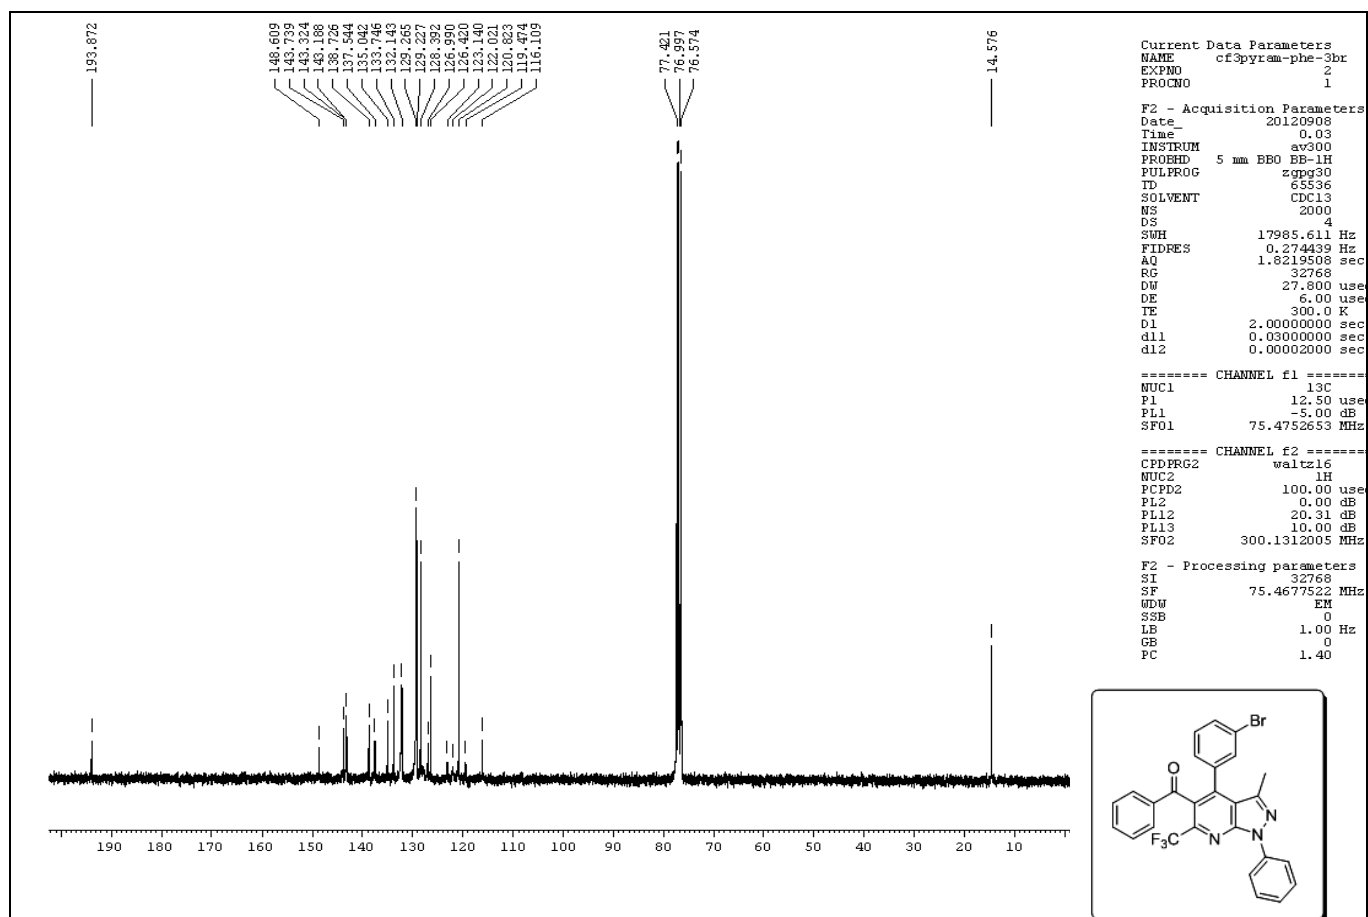

Figure 85.  $^{13}\text{C}$  NMR spectrum of 4q

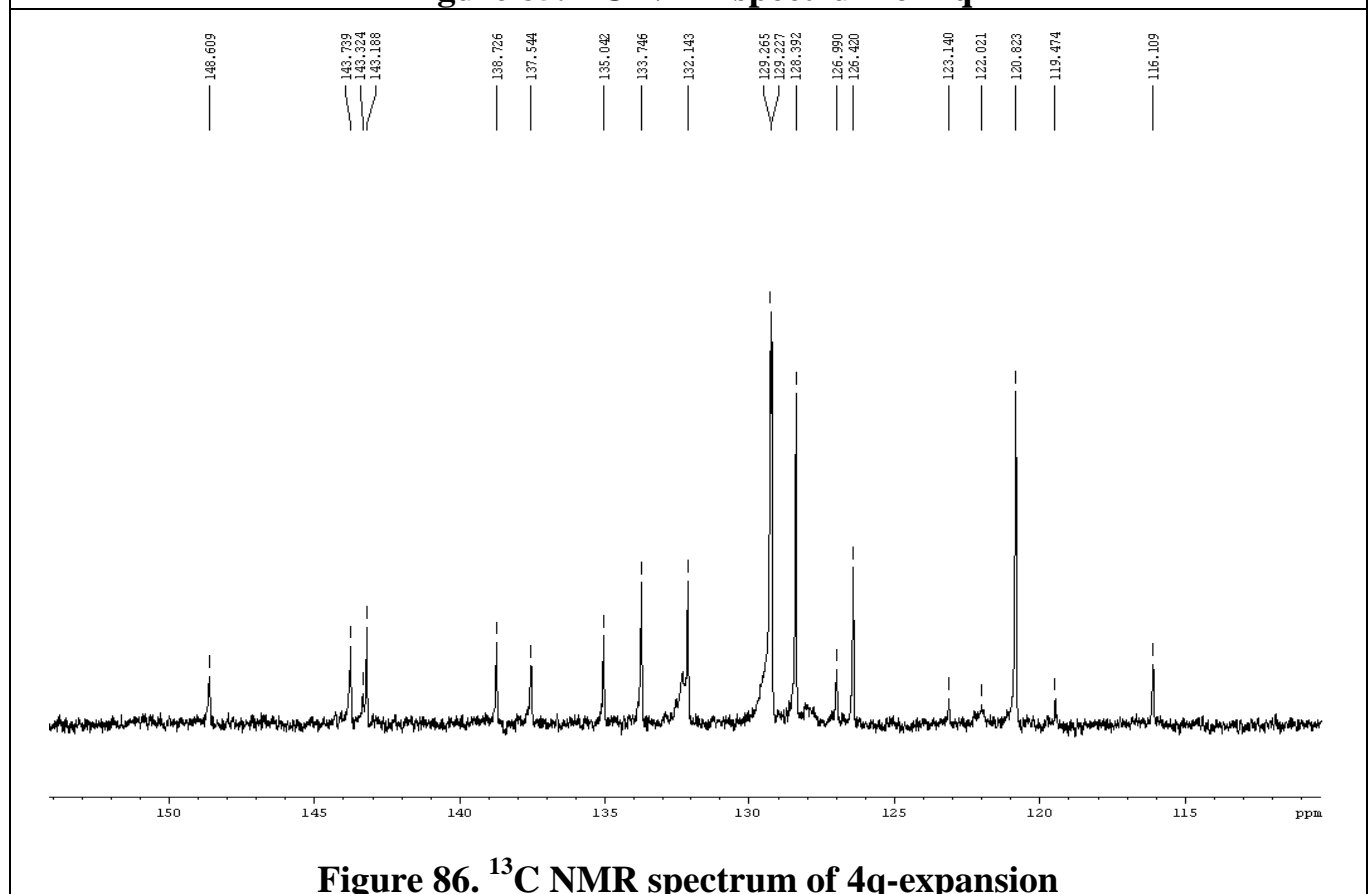

Figure 86.  $^{13}\text{C}$  NMR spectrum of 4q-expansion

Q17\_121026172426 #49 RT: 0.84 AV: 1 NL: 1.15E3  
T: ITMS + c ESI Full ms [100.00-1000.00]

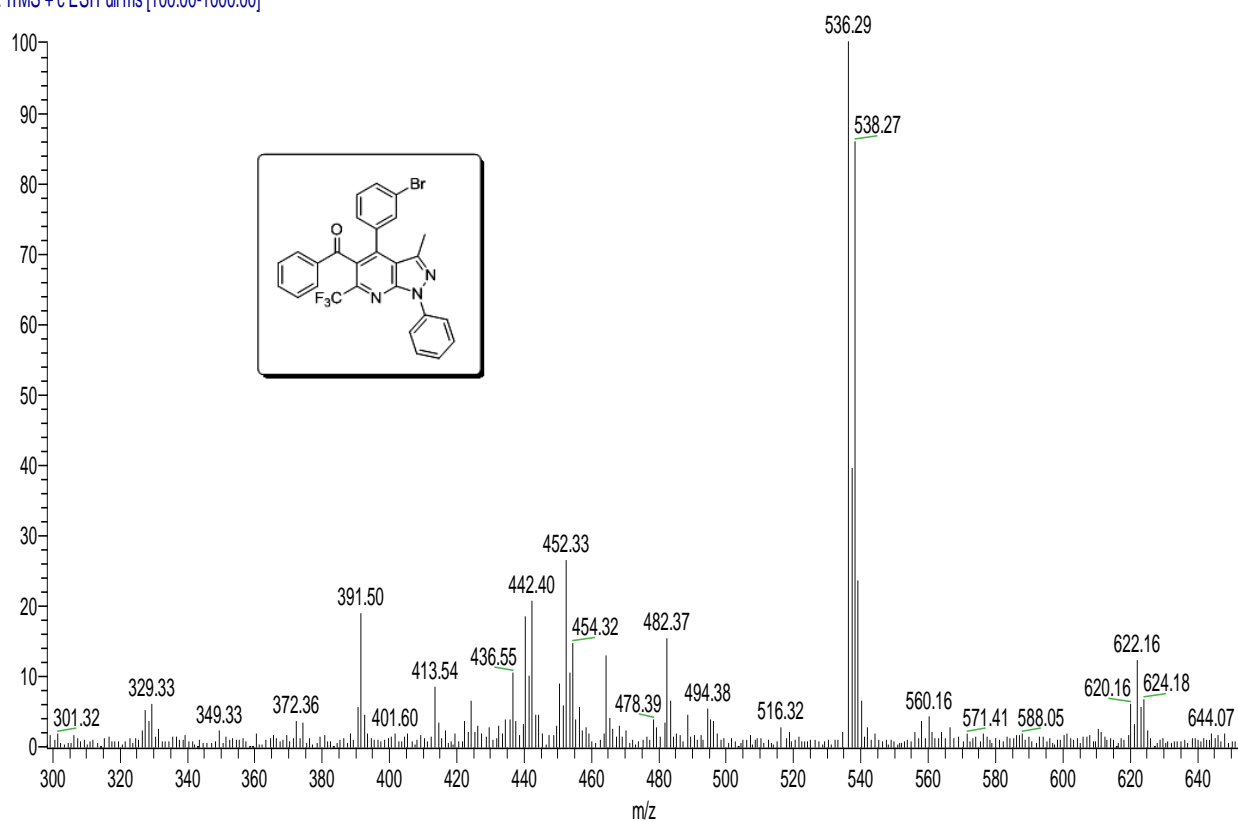

Figure 87. Mass spectrum of 4q

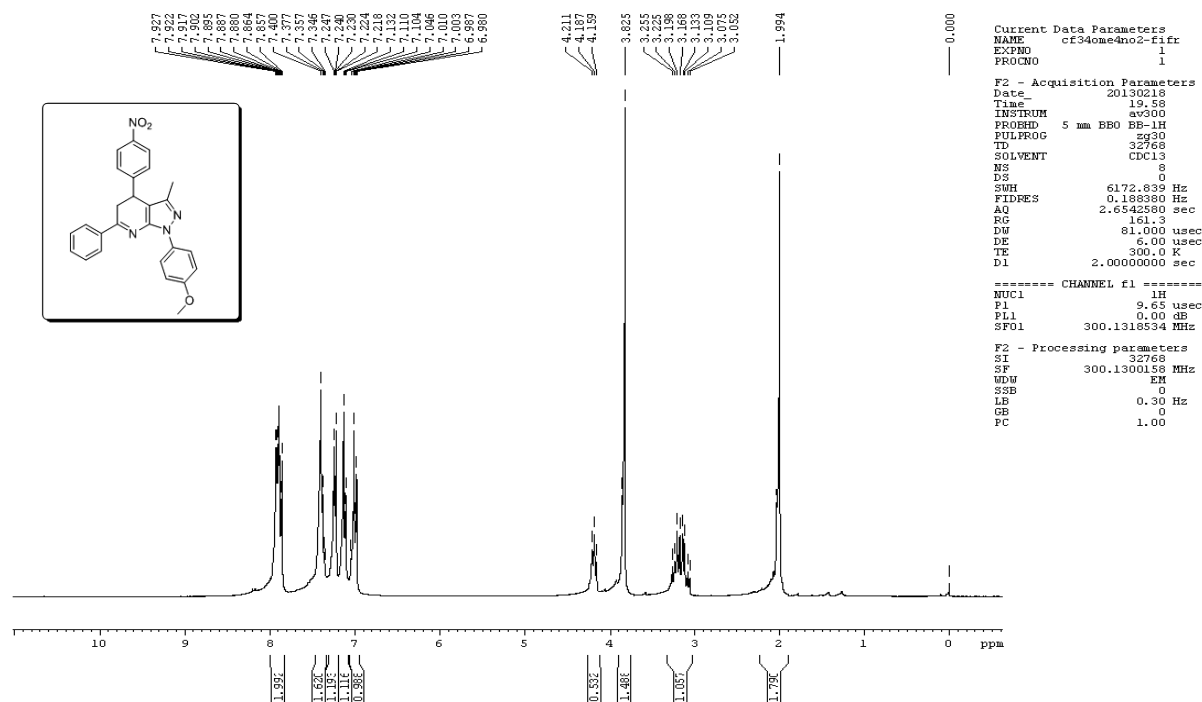

Figure 88. <sup>1</sup>H NMR spectrum of 5r



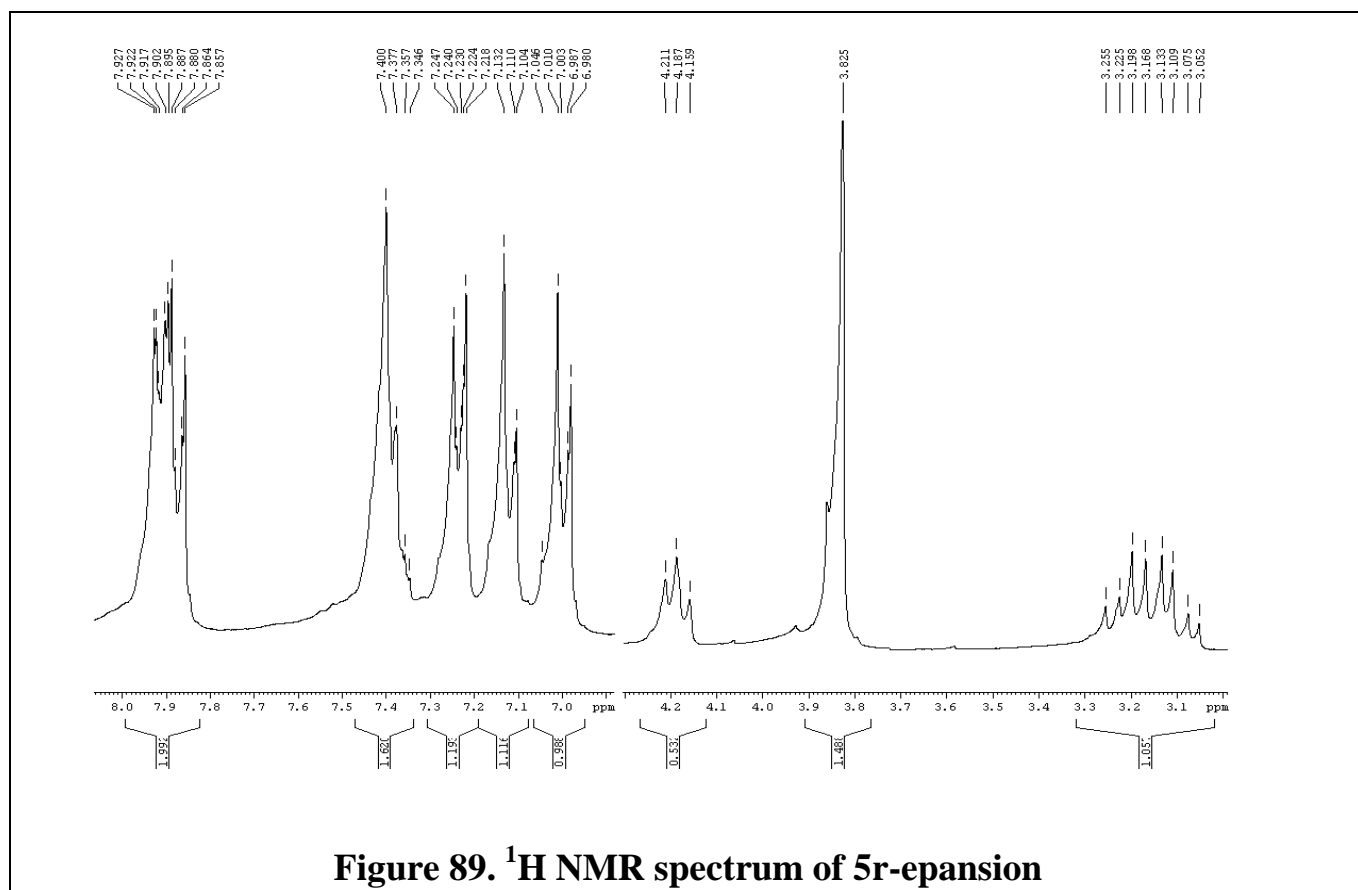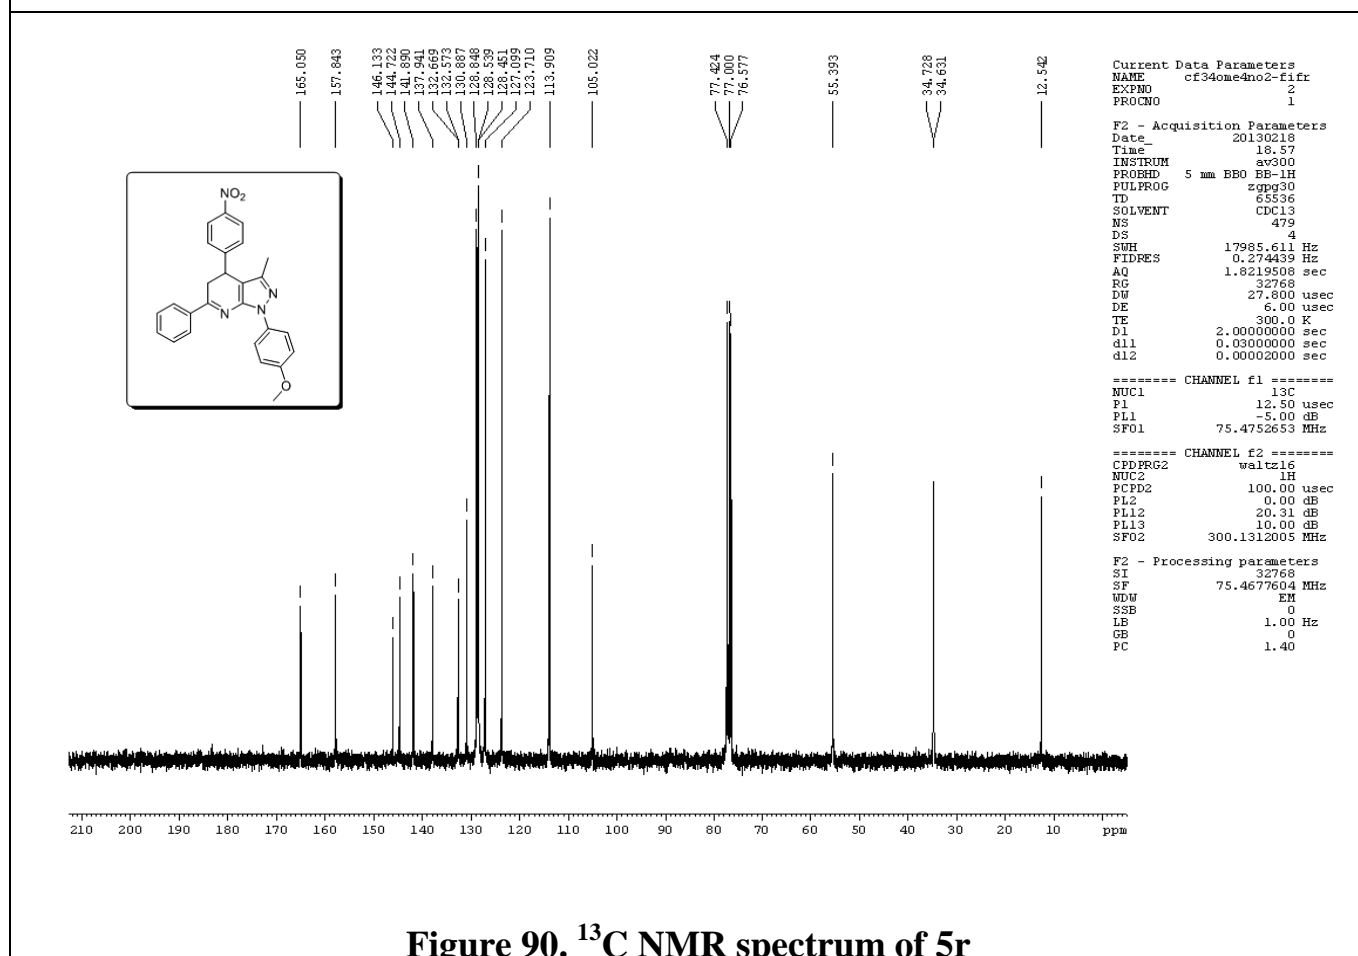

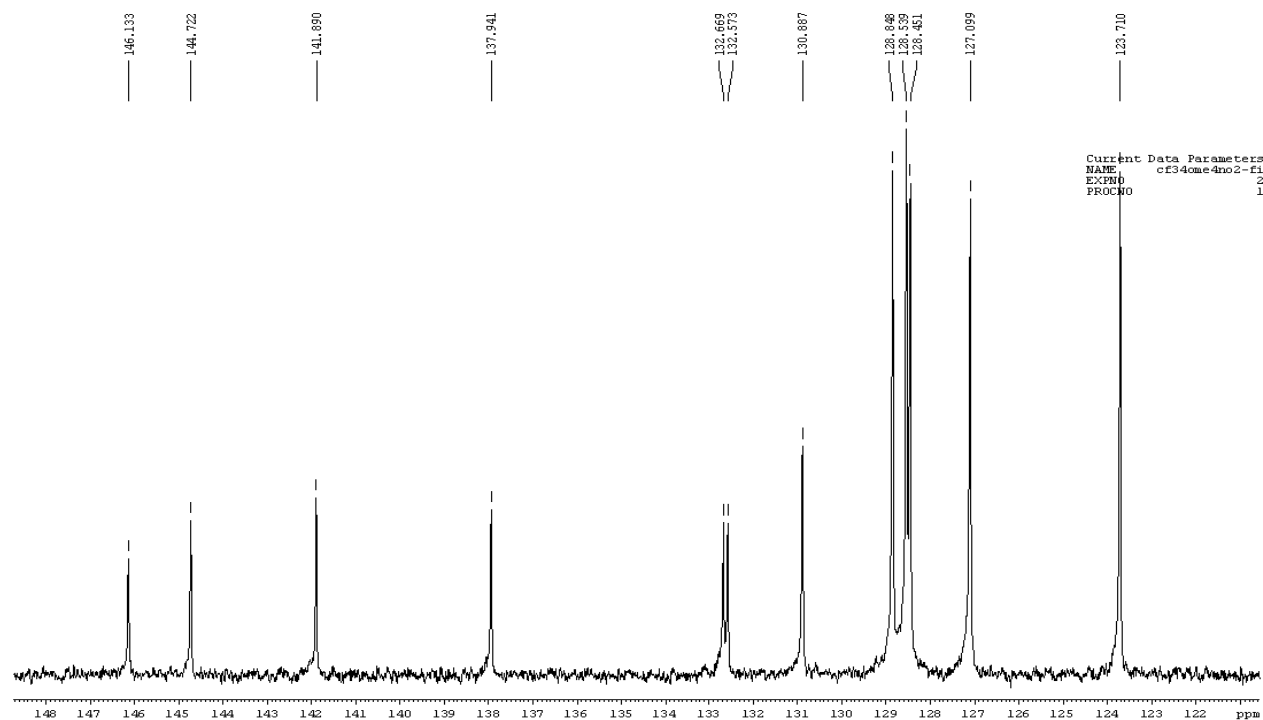

Figure 90.  $^{13}\text{C}$  NMR spectrum of 5r-expansion

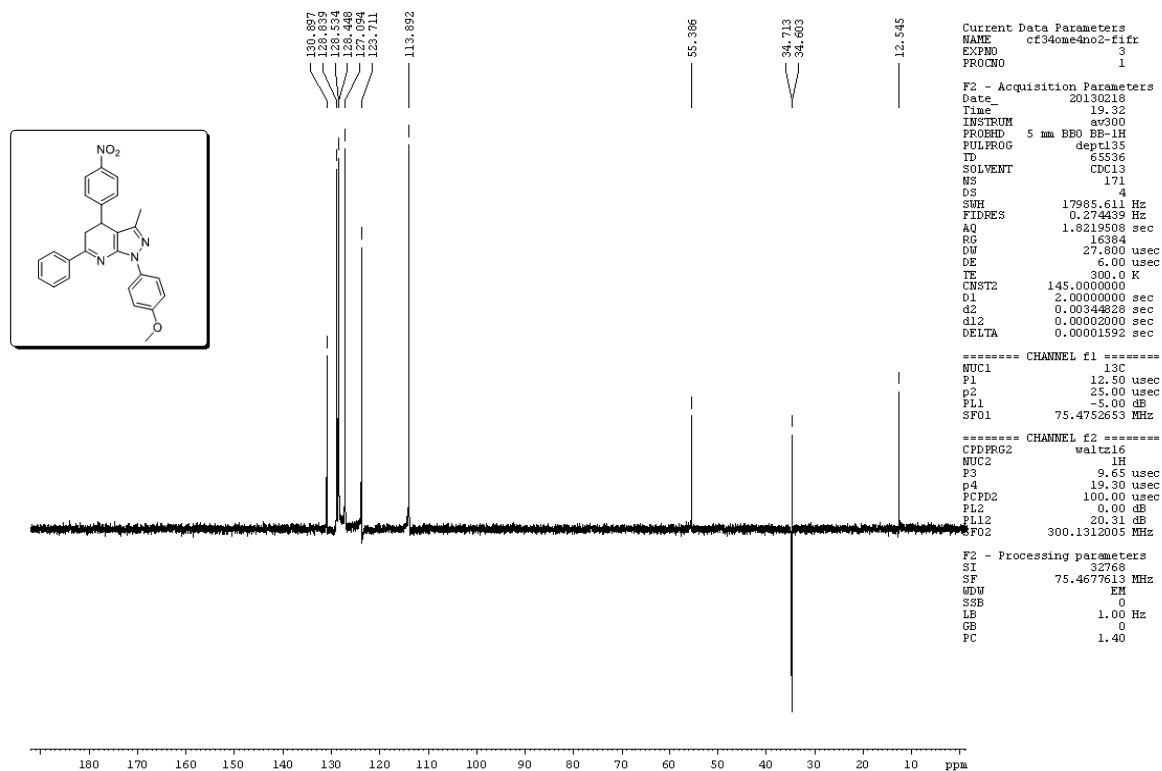

Figure 91. Dept-135 NMR spectrum of 5r

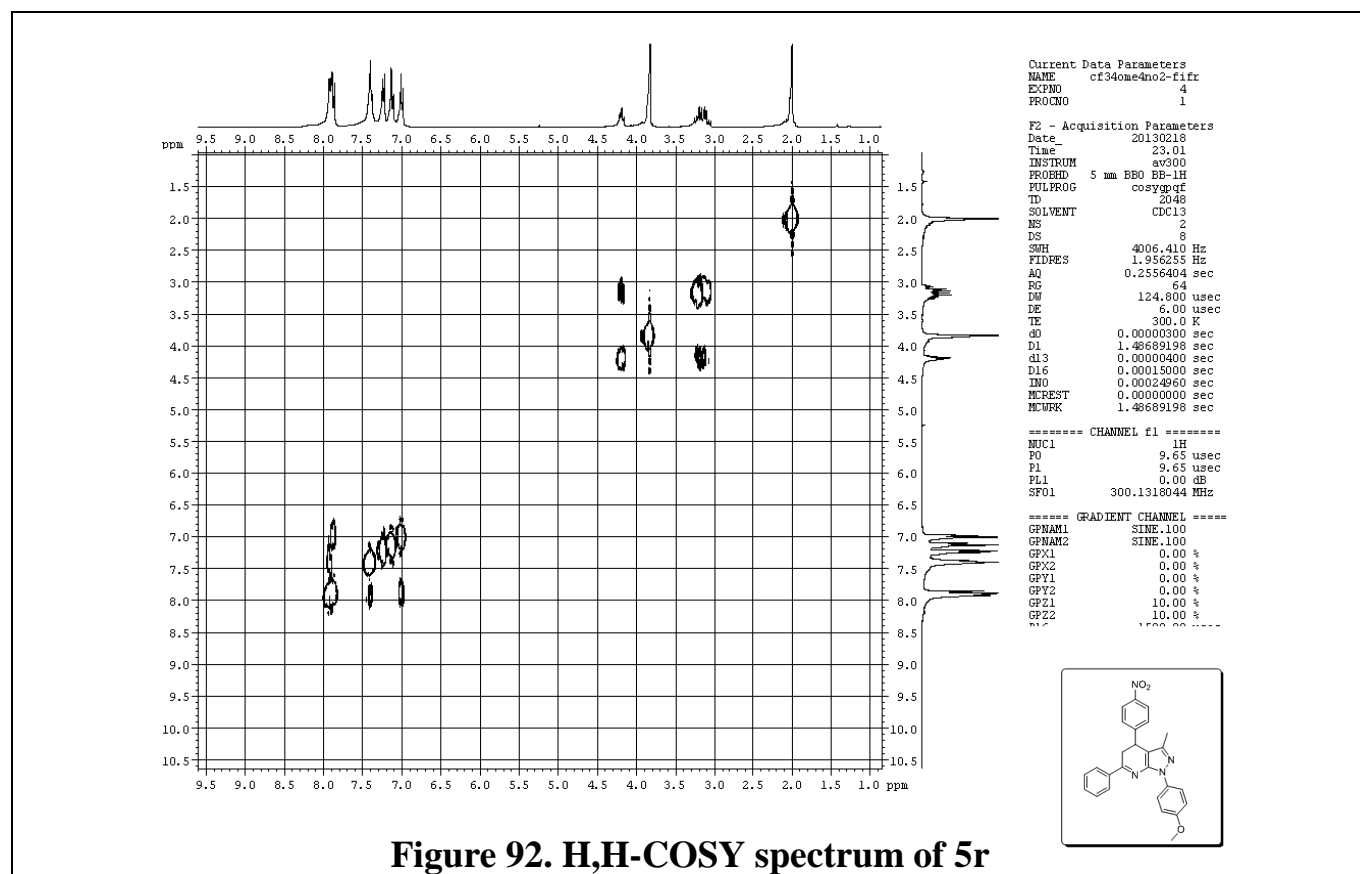

Figure 92. H,H-COSY spectrum of 5r

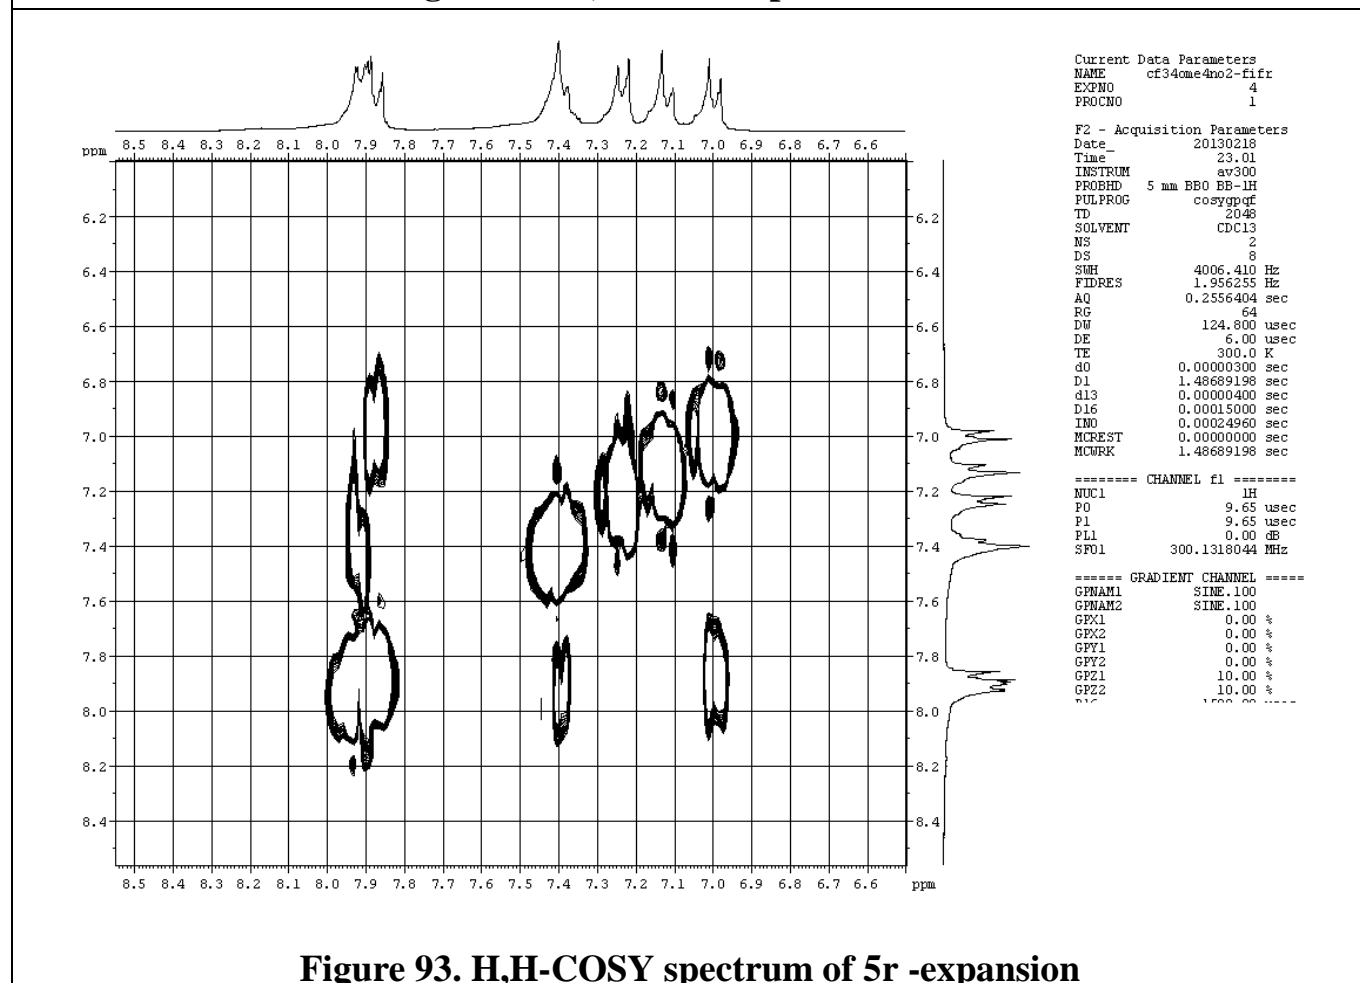

Figure 93. H,H-COSY spectrum of 5r -expansion

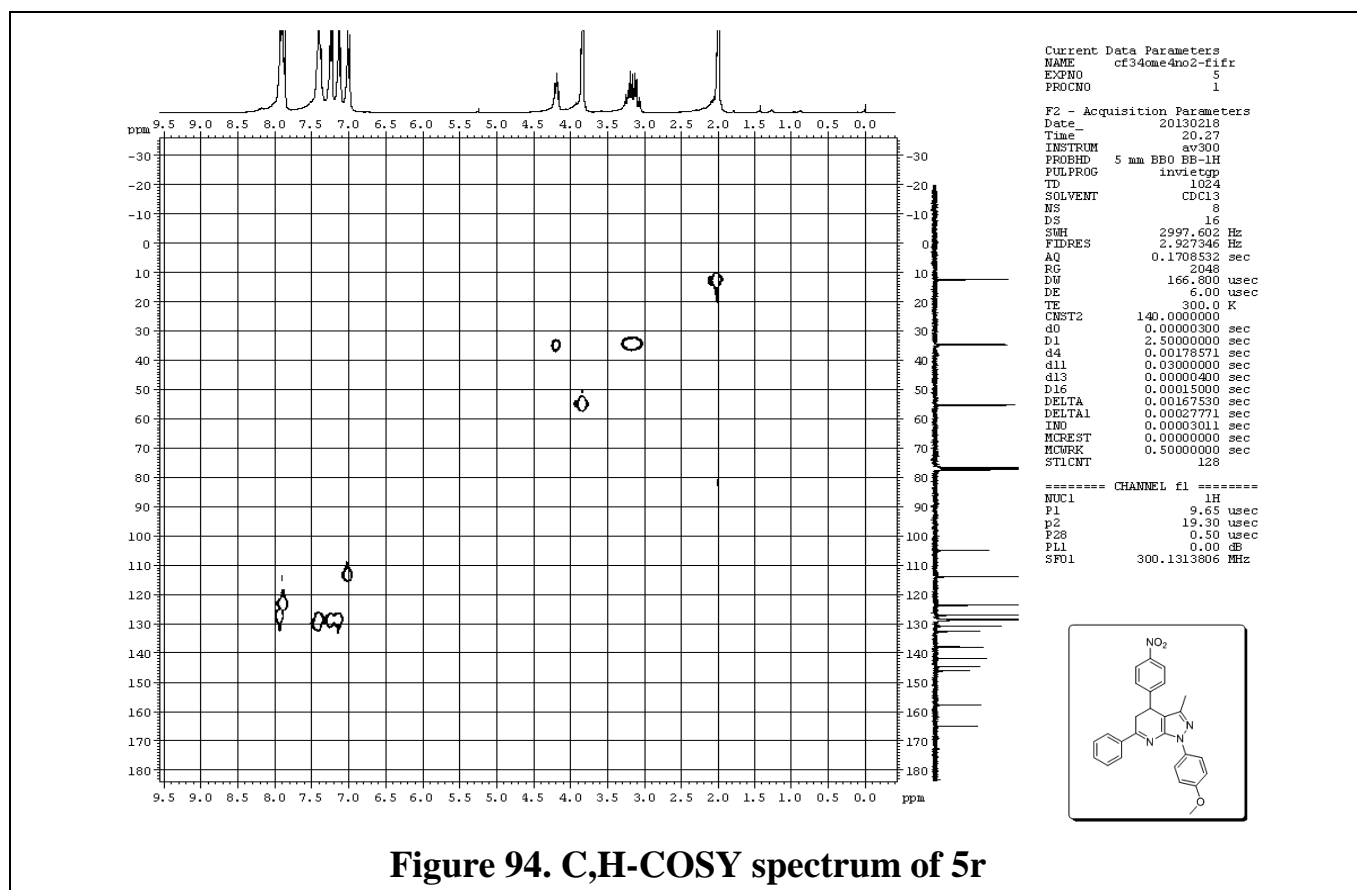

Figure 94. C,H-COSY spectrum of 5r

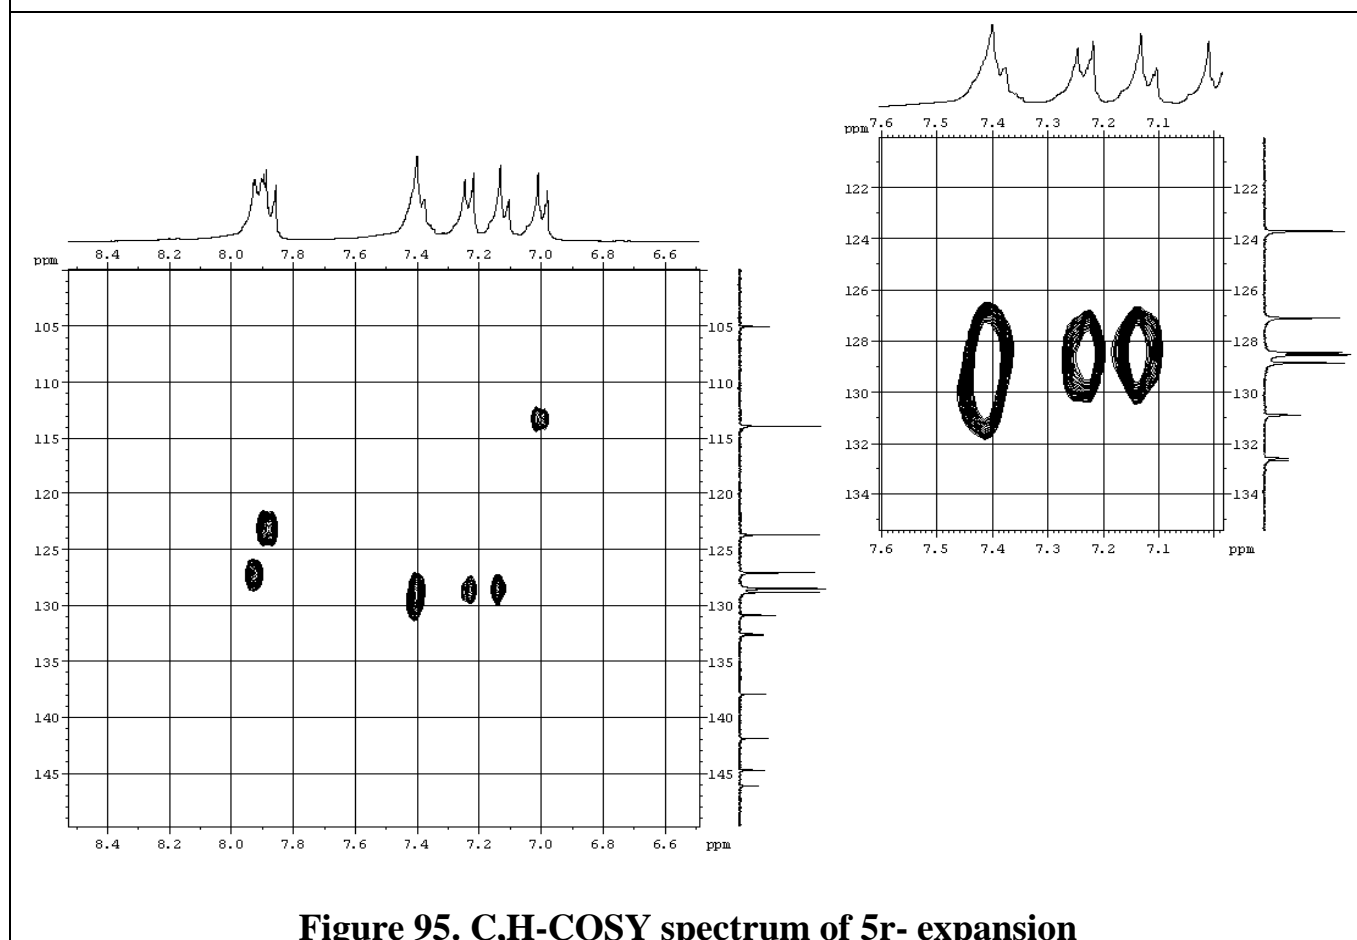

Figure 95. C,H-COSY spectrum of 5r- expansion

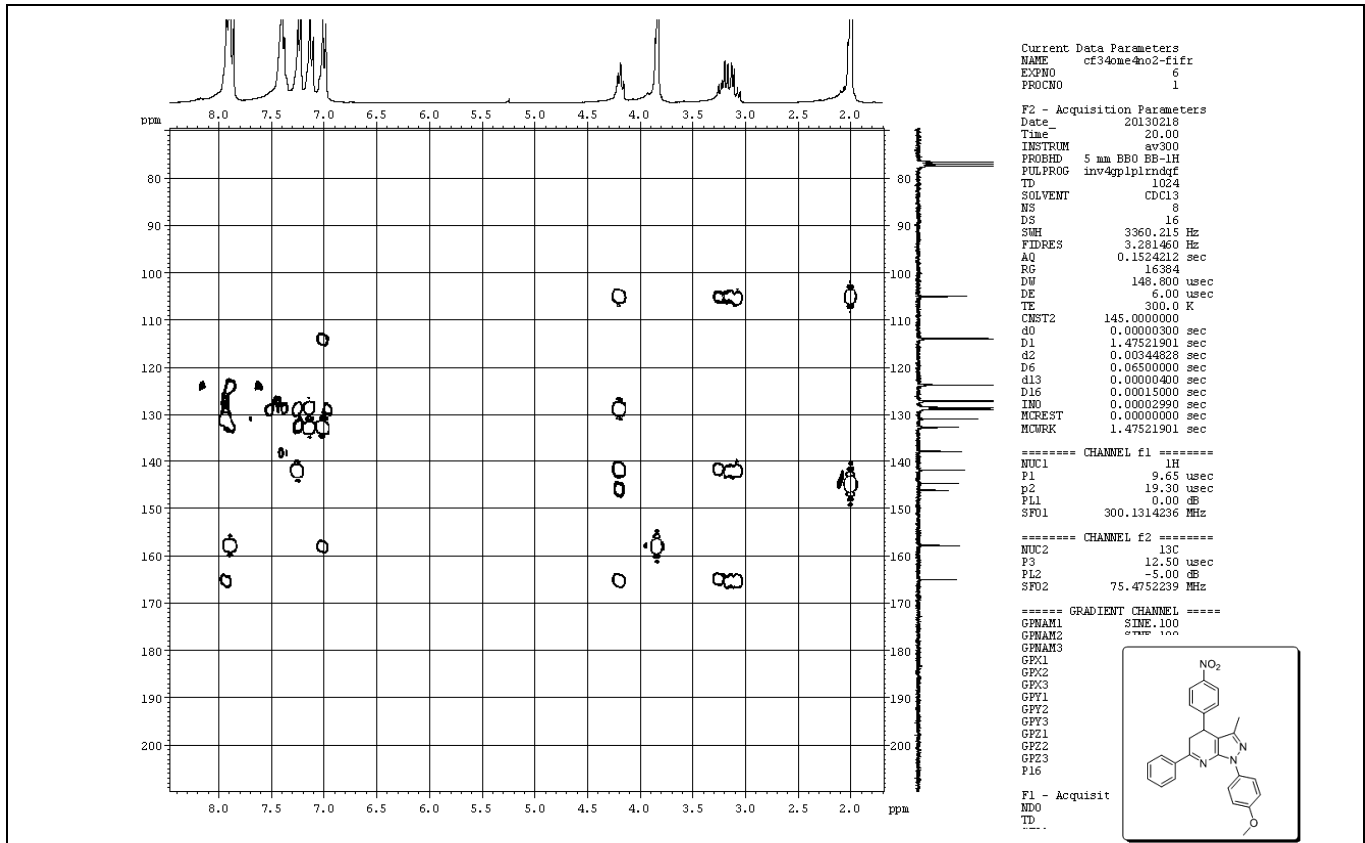

Figure 96. HMBC spectrum of 5r

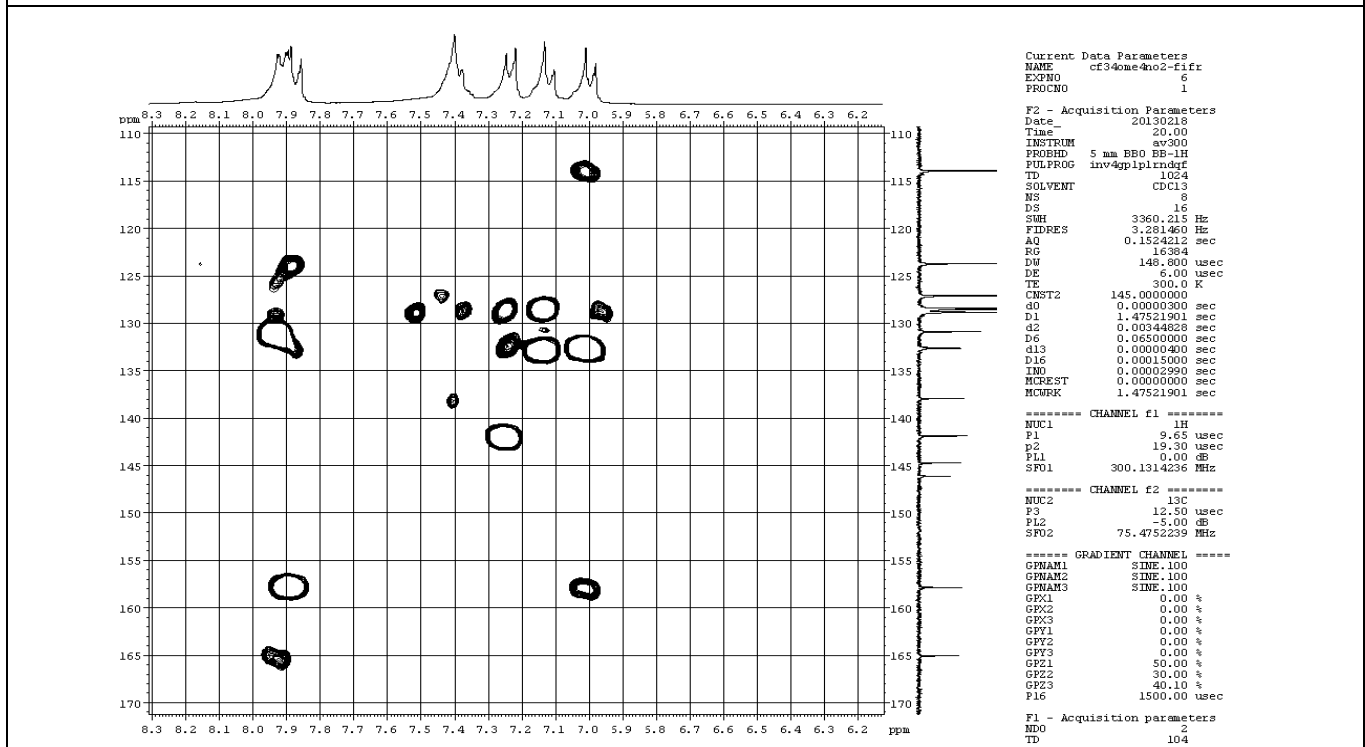

Figure 97. HMBC spectrum of 5r - expansion

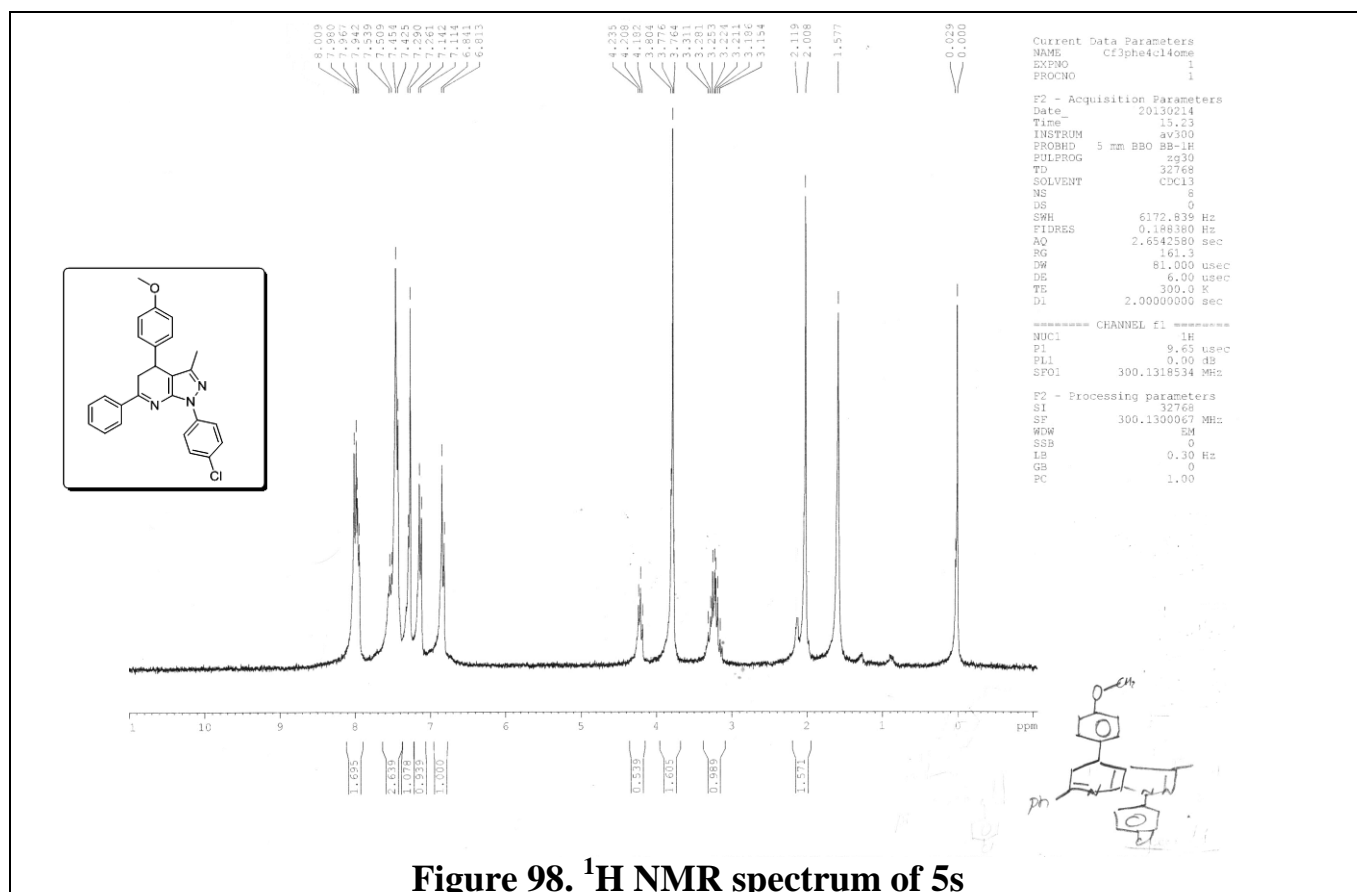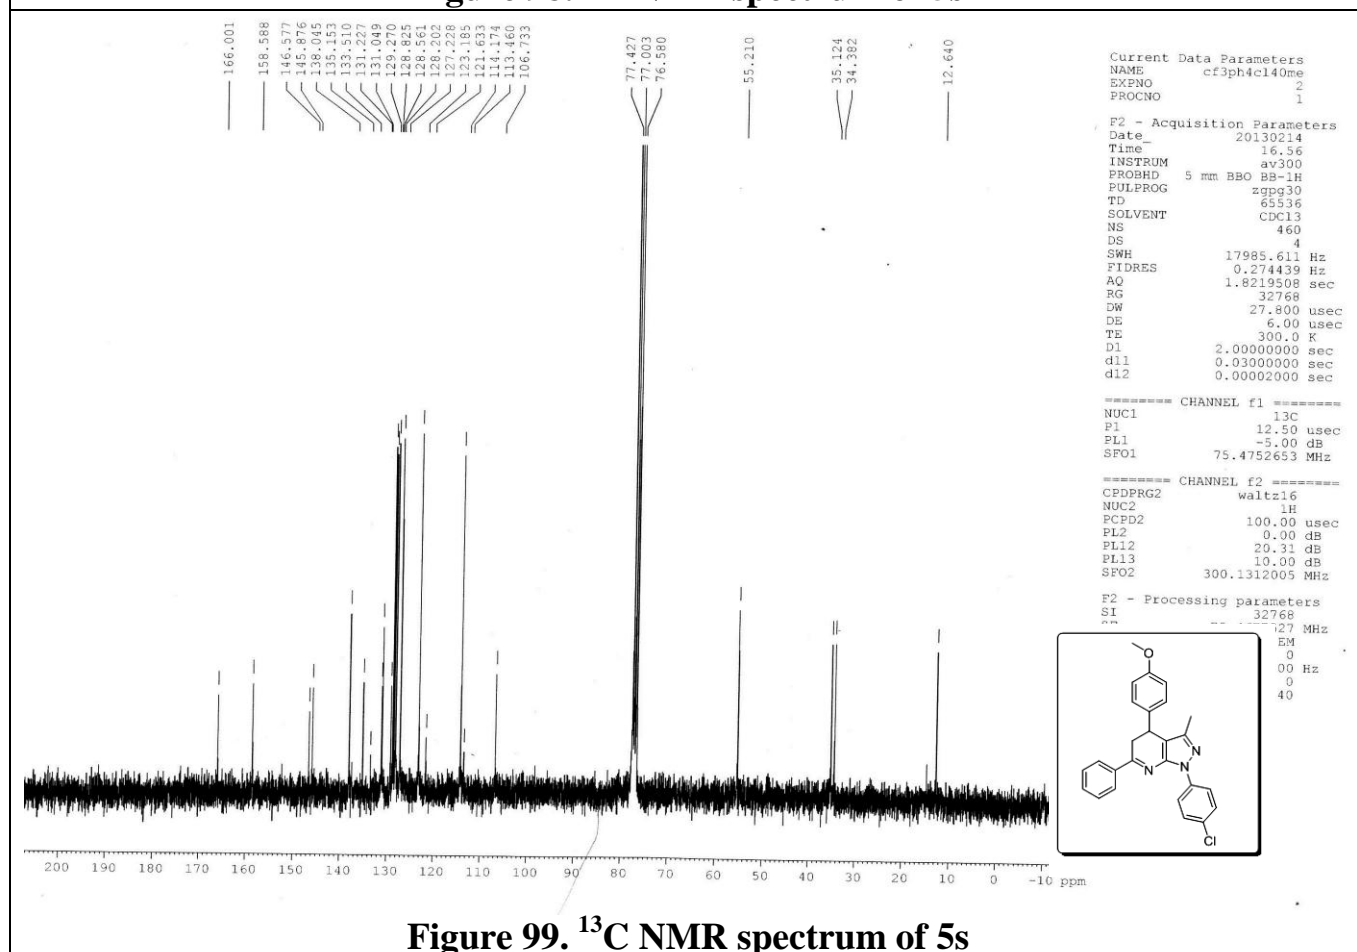

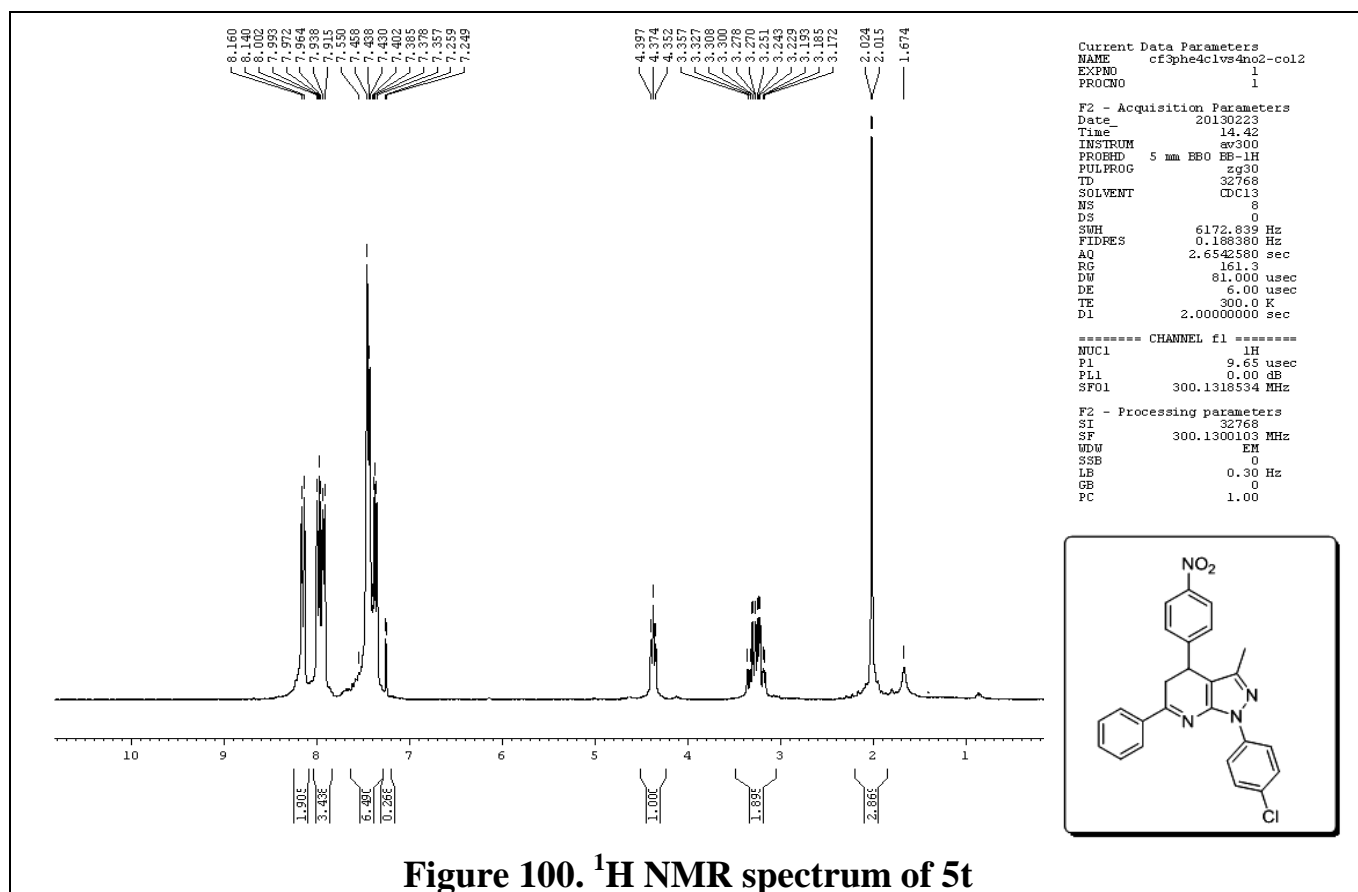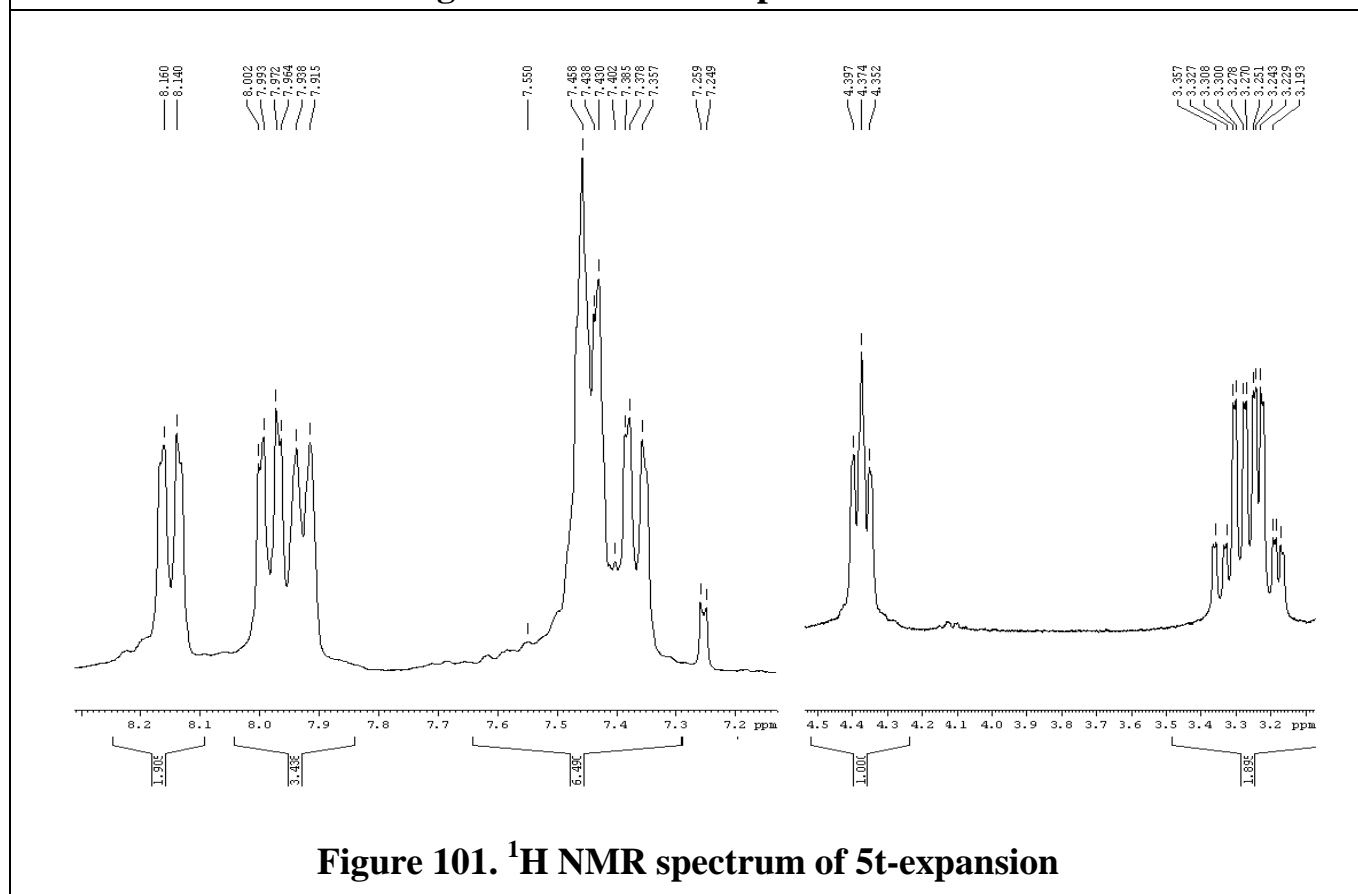

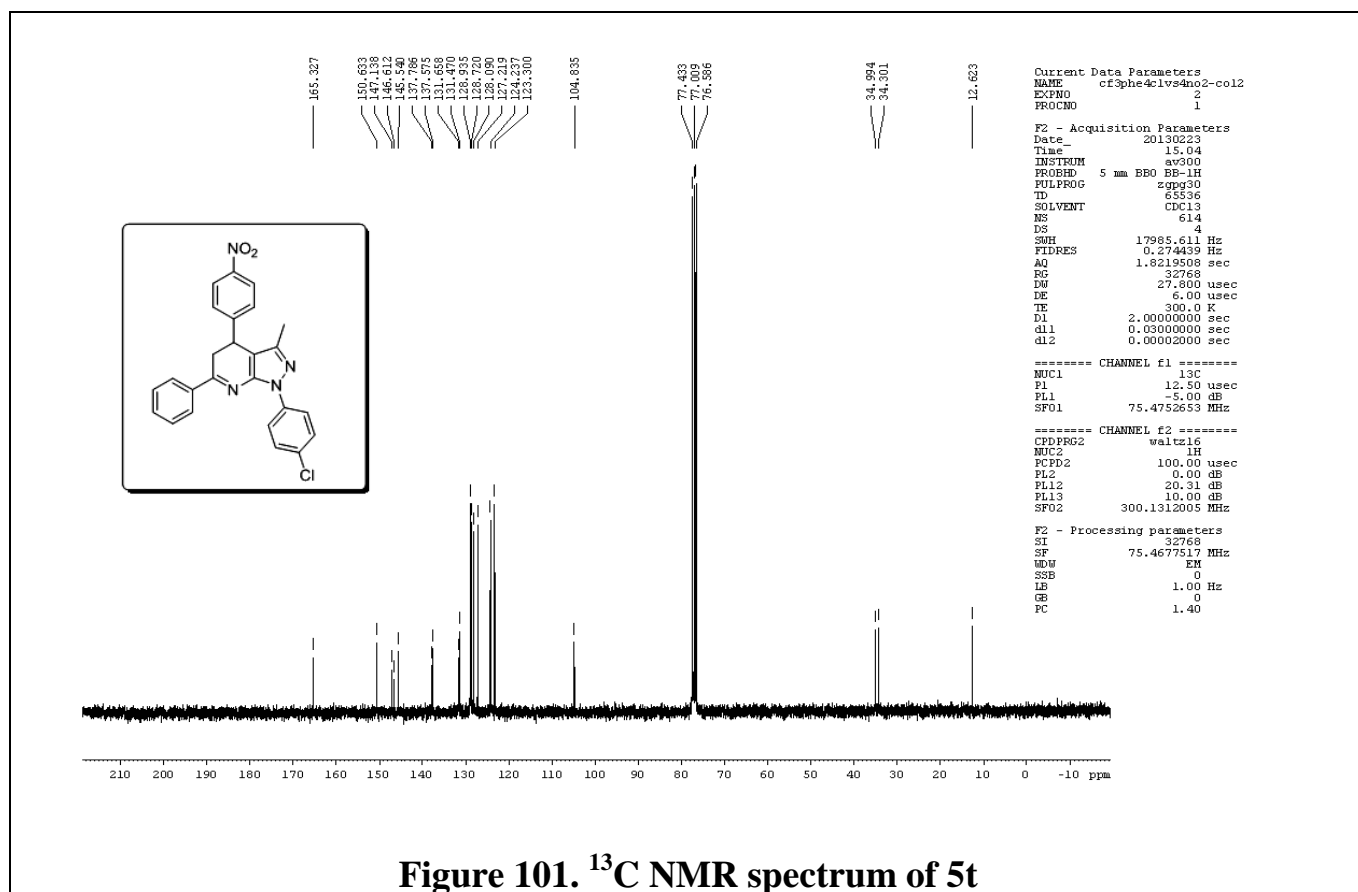

Figure 101. <sup>13</sup>C NMR spectrum of 5t

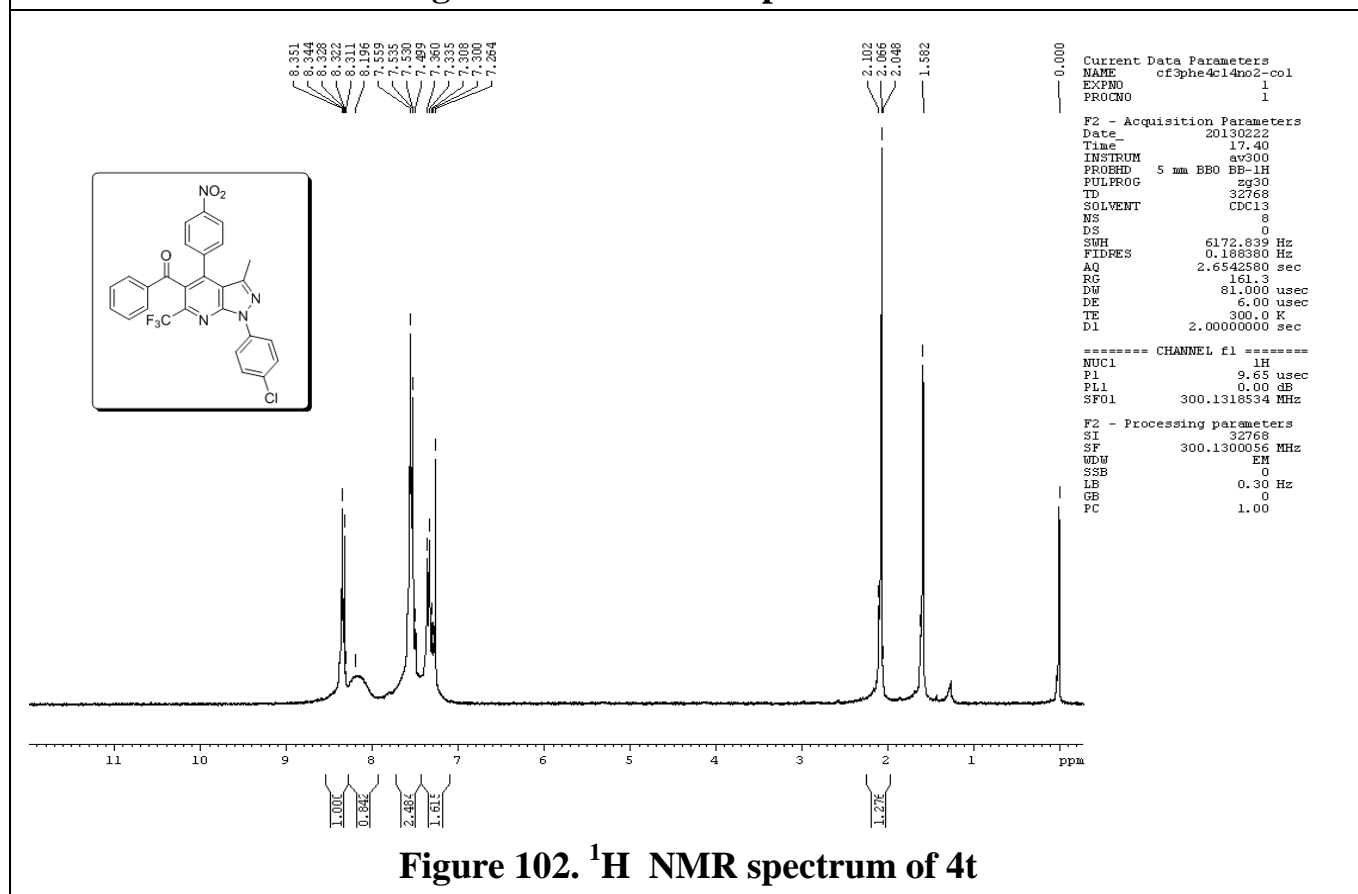

Figure 102. <sup>1</sup>H NMR spectrum of 4t



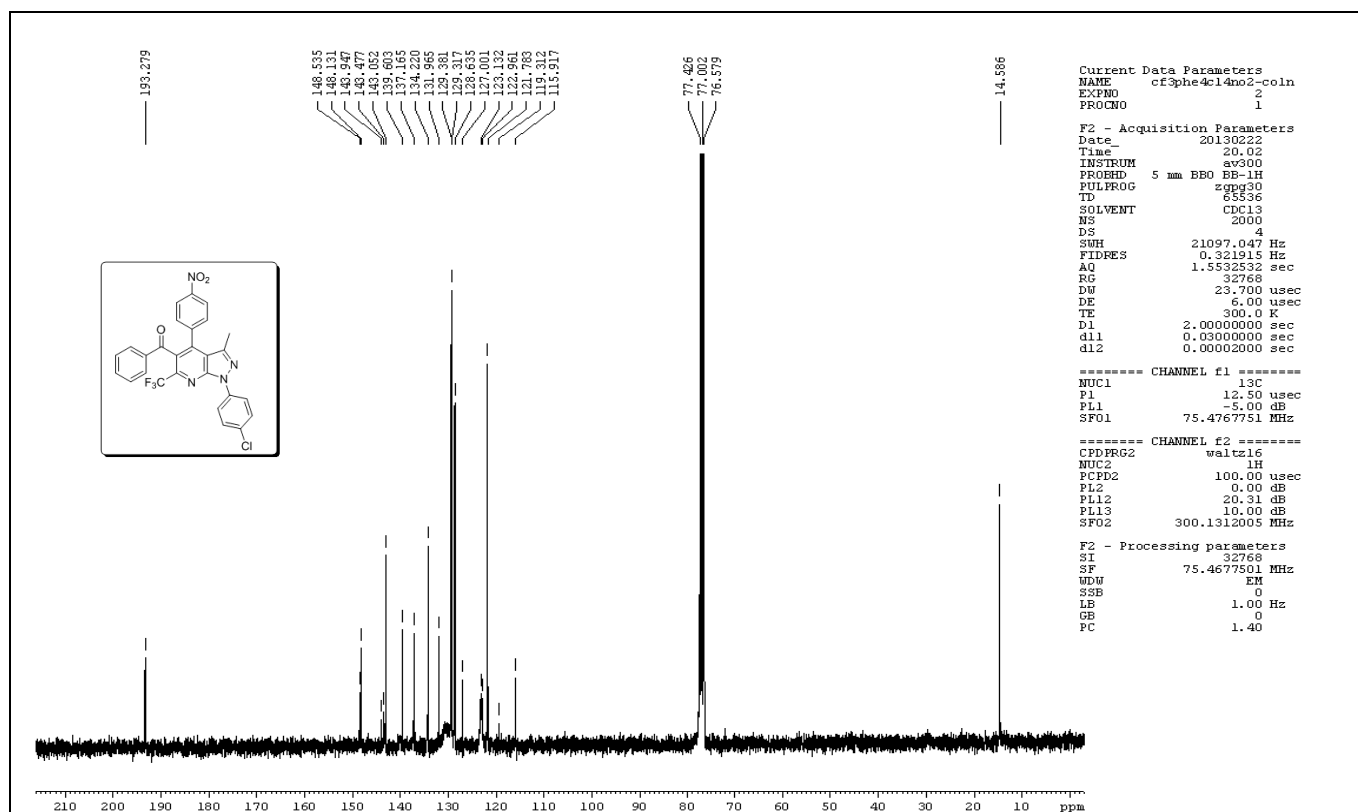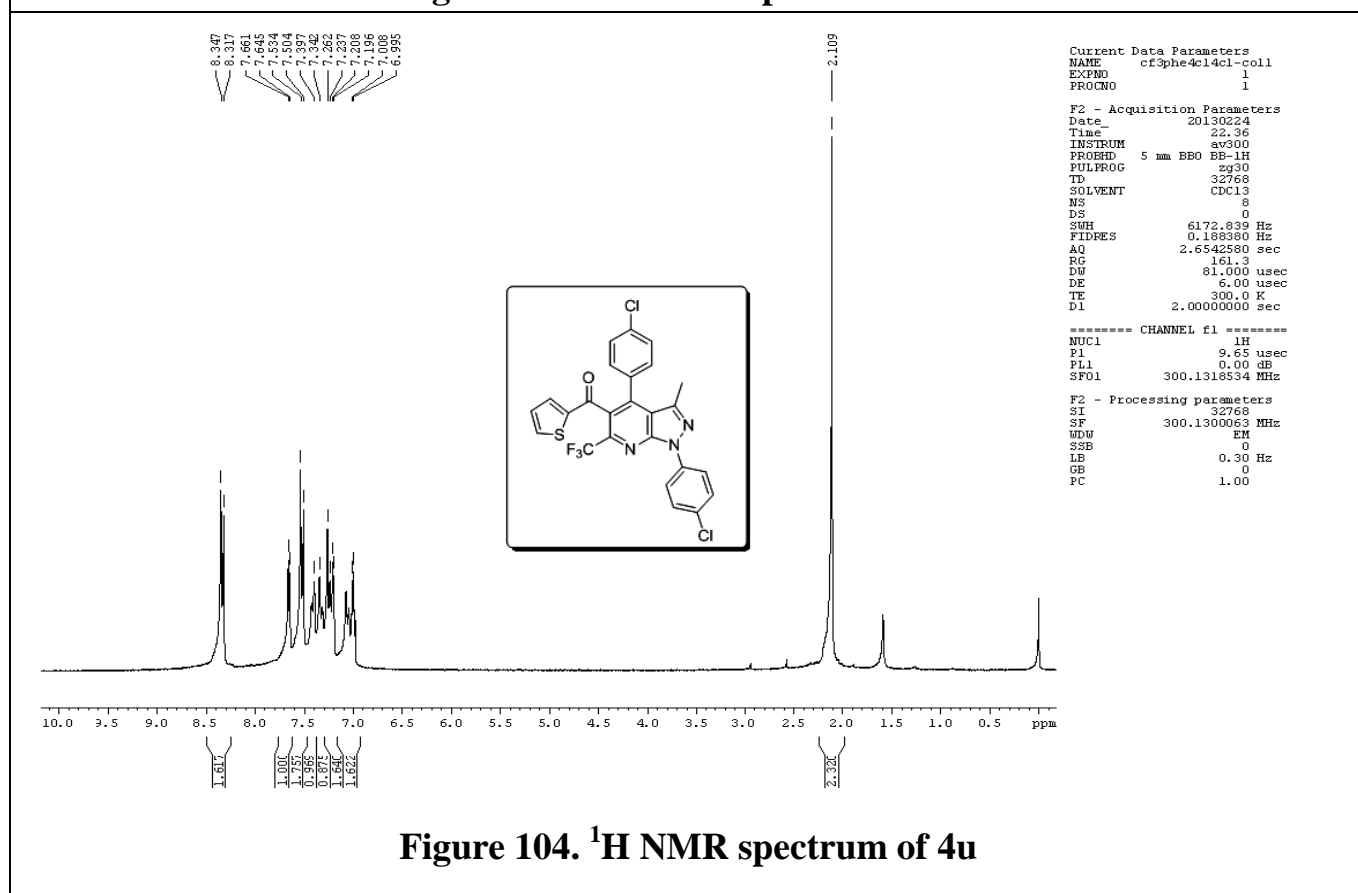

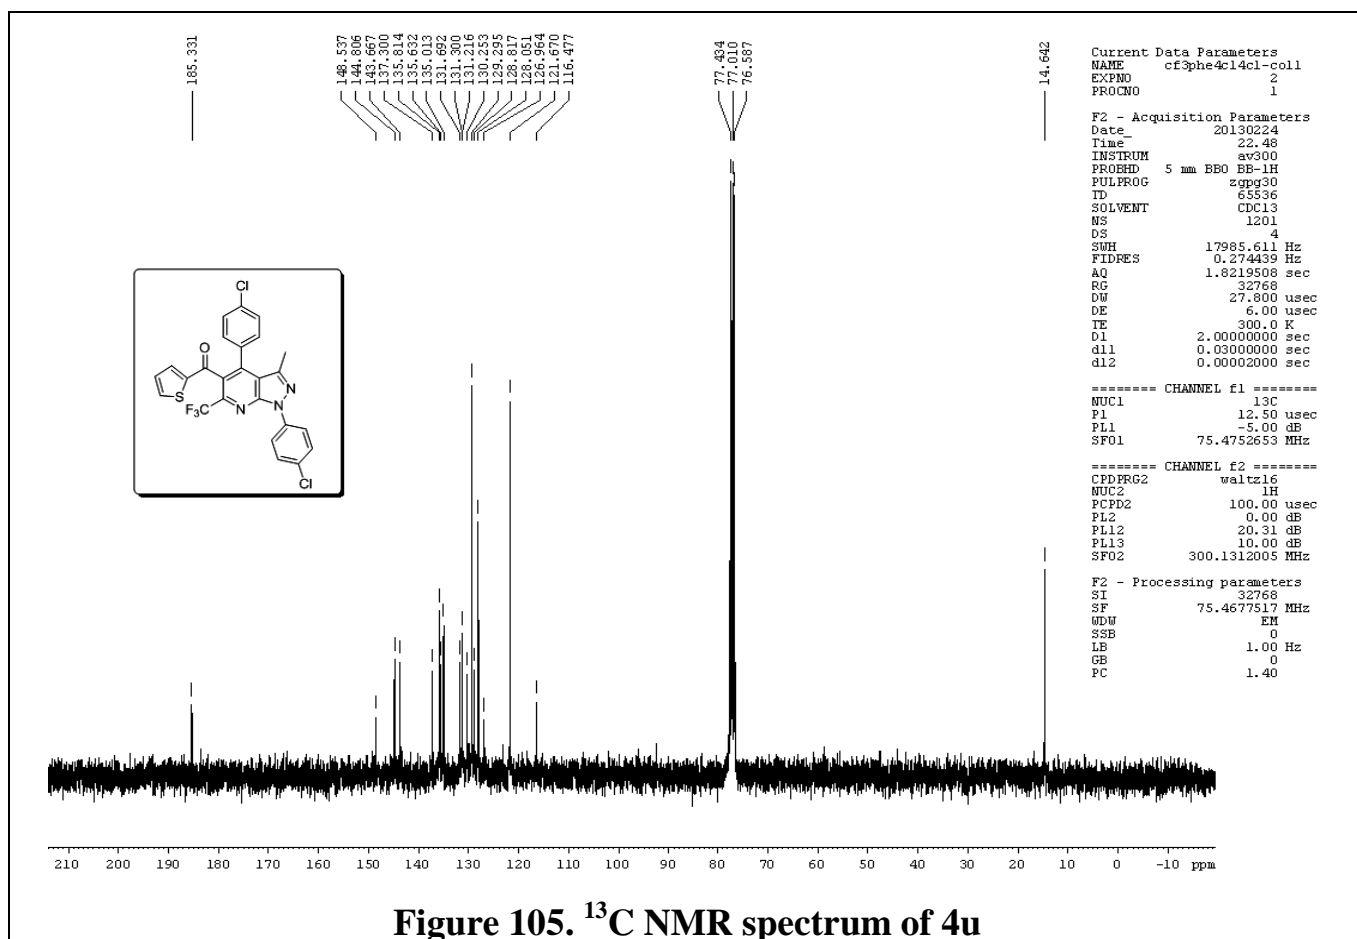

Figure 105. <sup>13</sup>C NMR spectrum of 4u

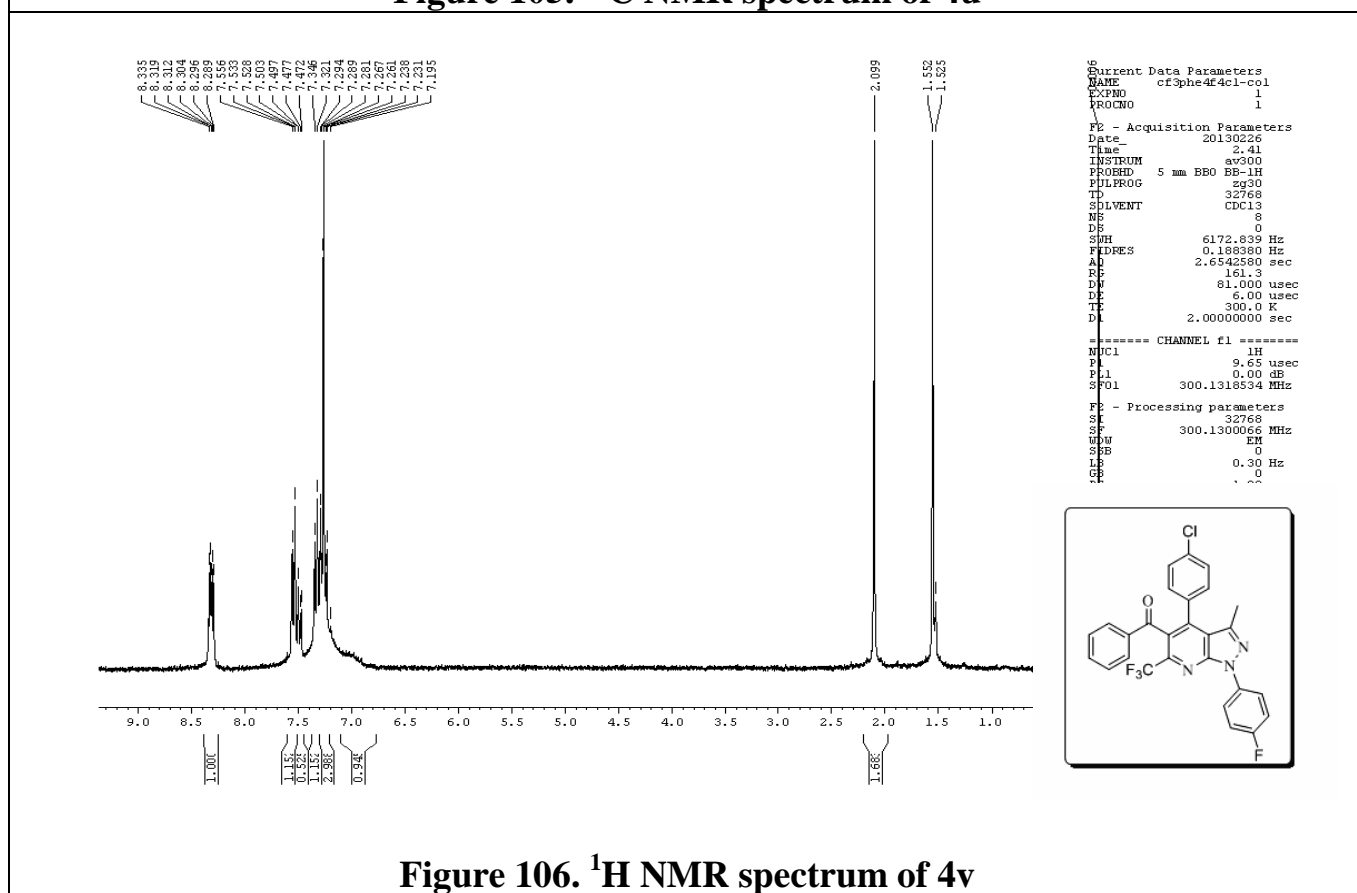

Figure 106. <sup>1</sup>H NMR spectrum of 4v

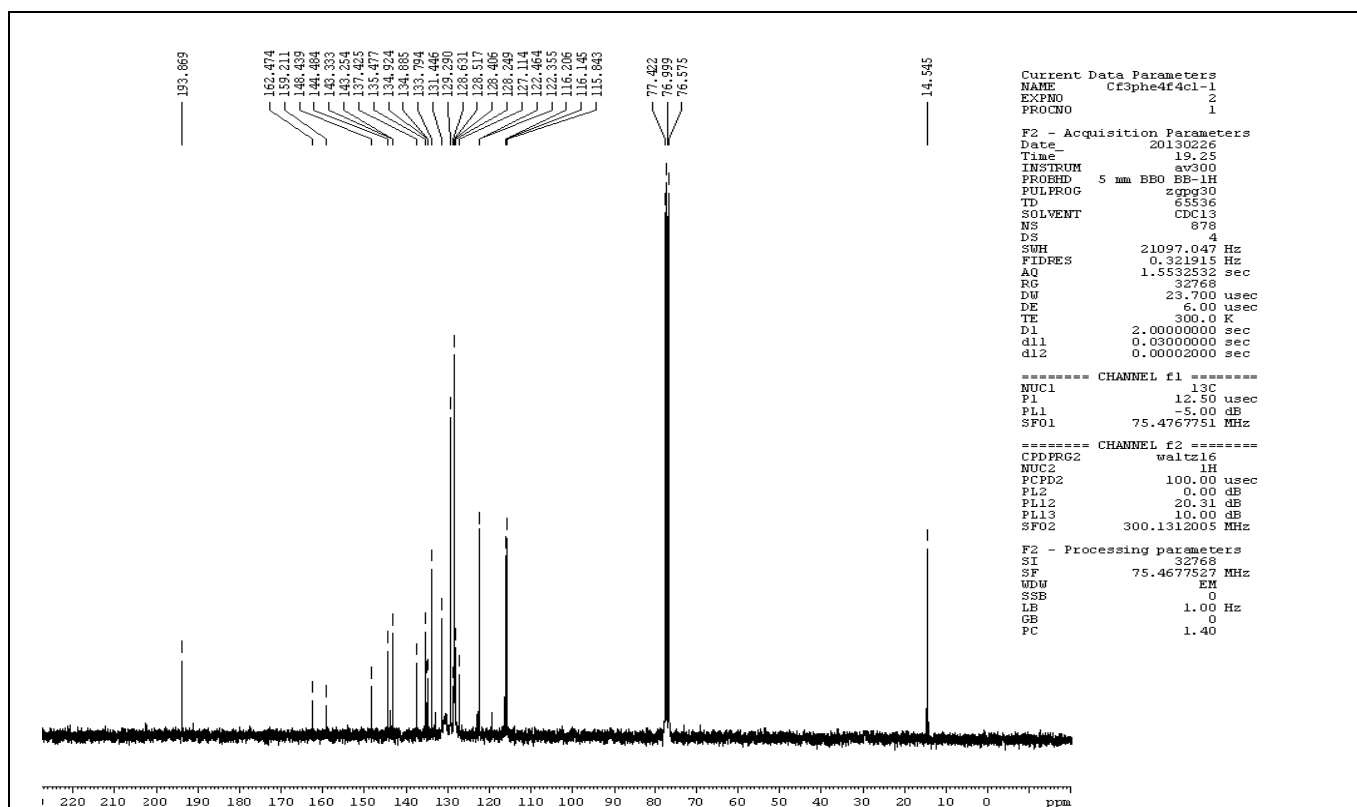

Figure 107.  $^{13}\text{C}$  NMR spectrum of 4v

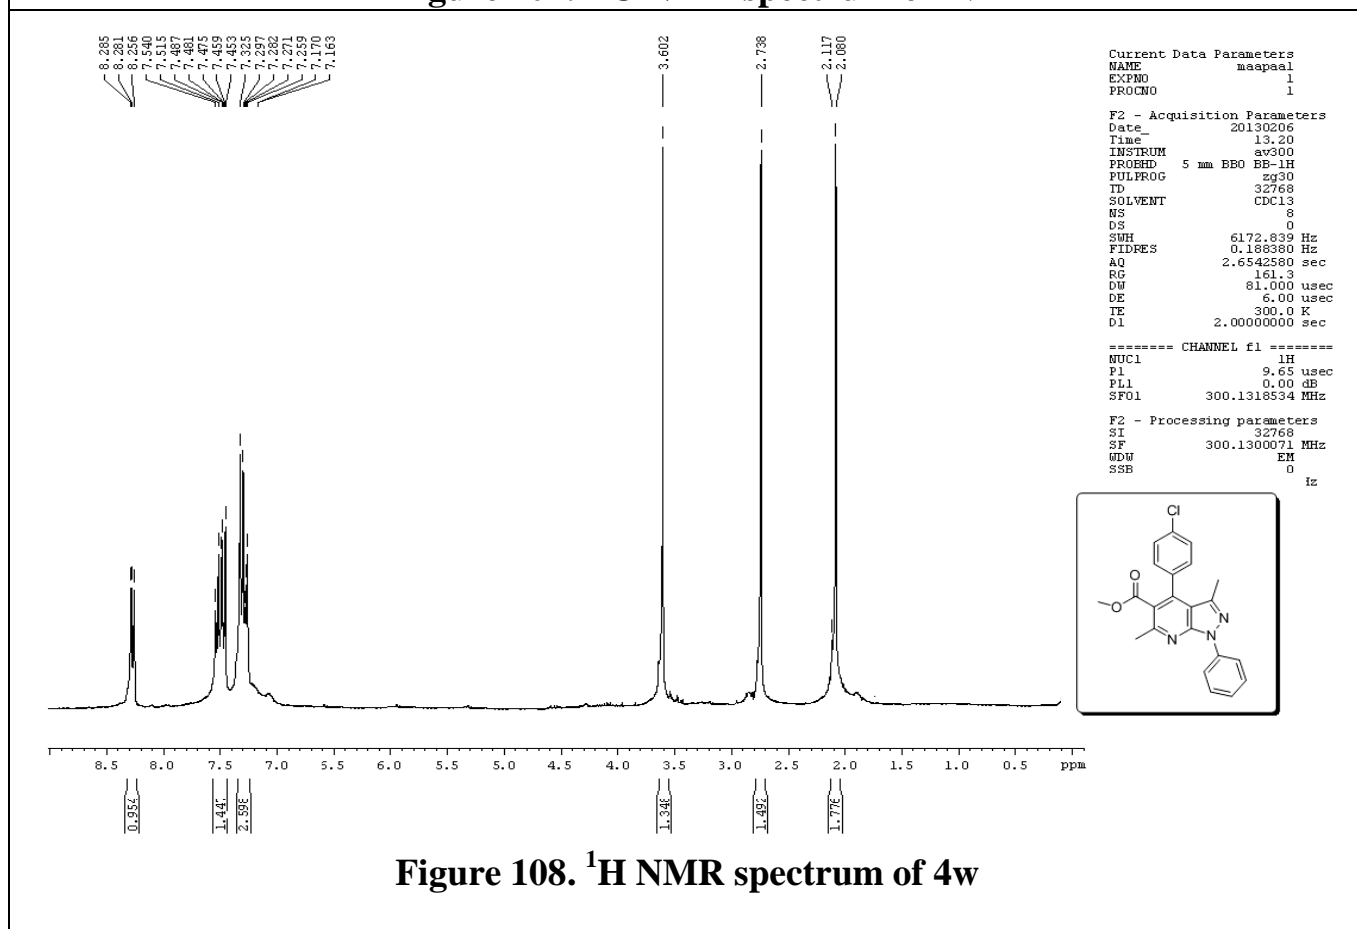

Figure 108.  $^1\text{H}$  NMR spectrum of 4w

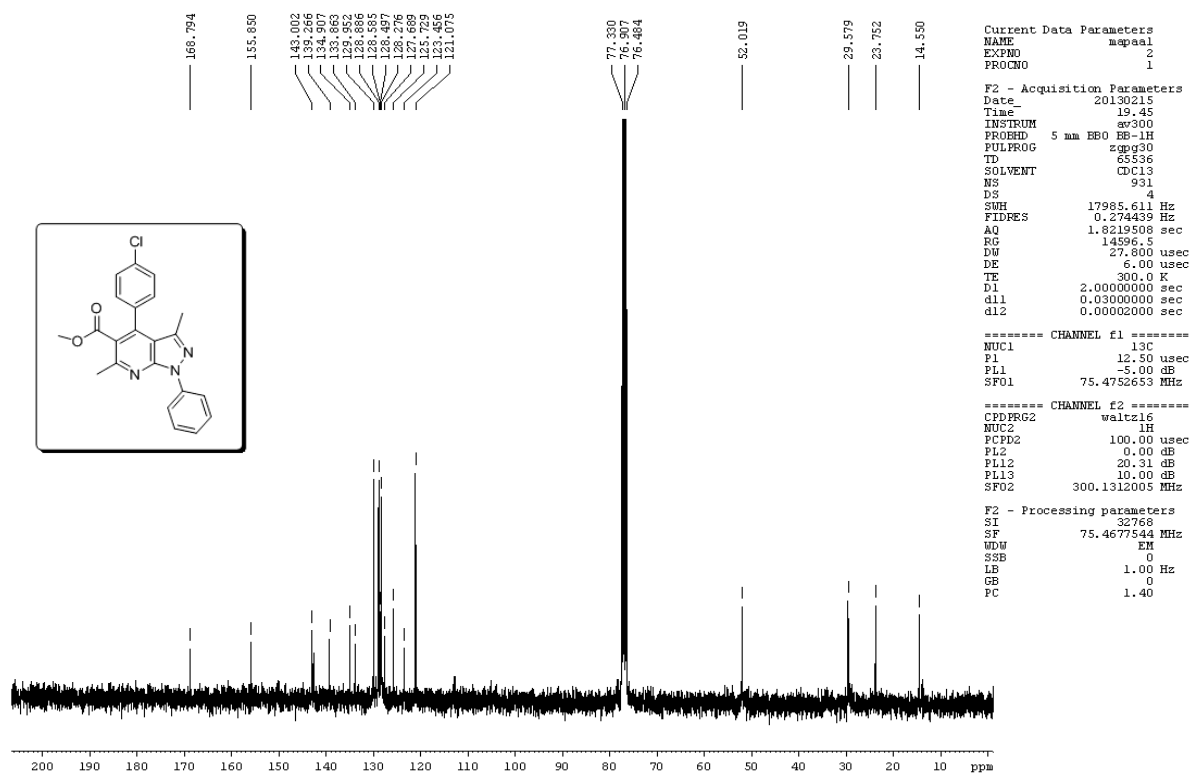

**Figure 109.  $^{13}\text{C}$  NMR spectrum of 4w**

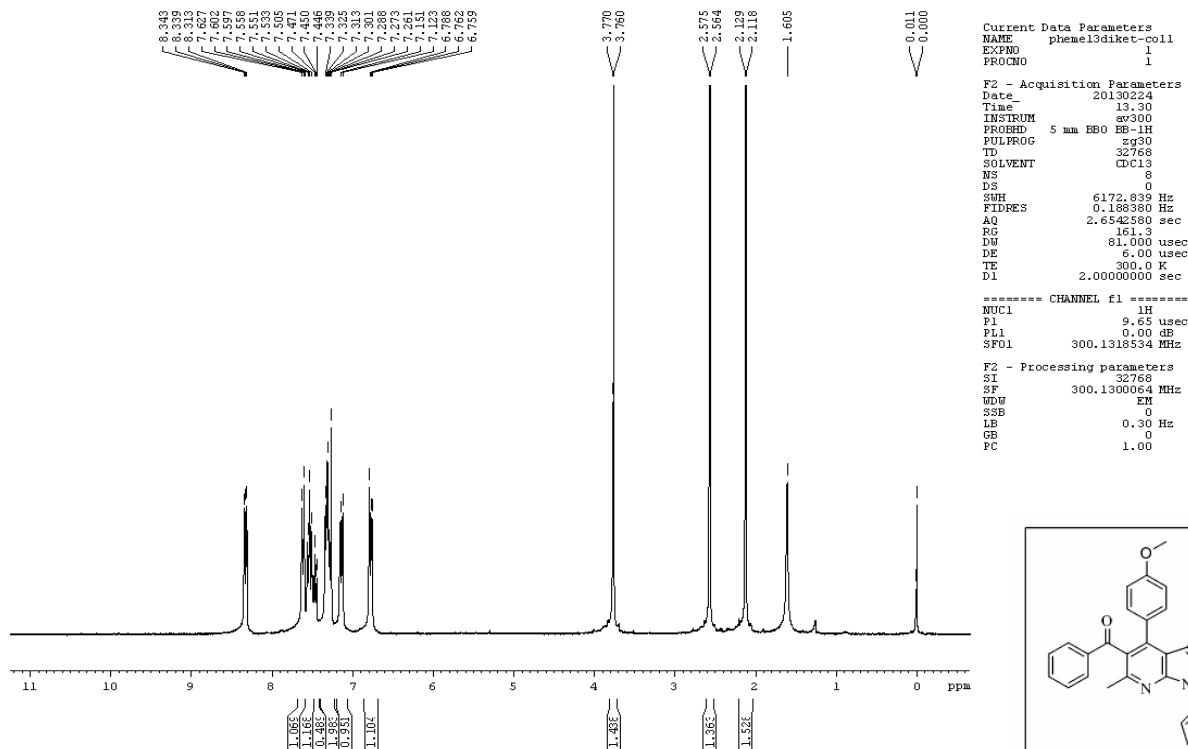

**Figure 110.  $^1\text{H}$  NMR spectrum of 4x**

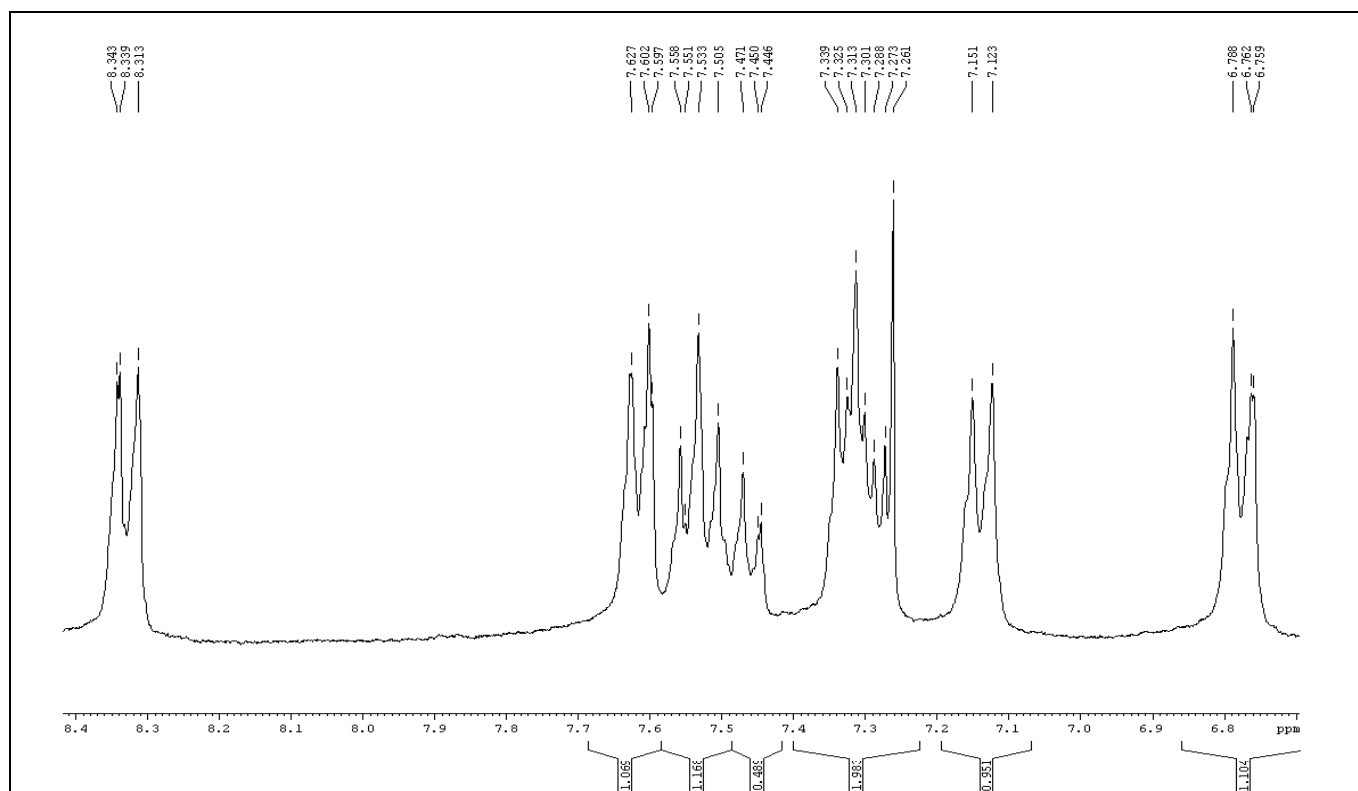

Figure 111.  $^1\text{H}$  NMR spectrum of 4x-expansion

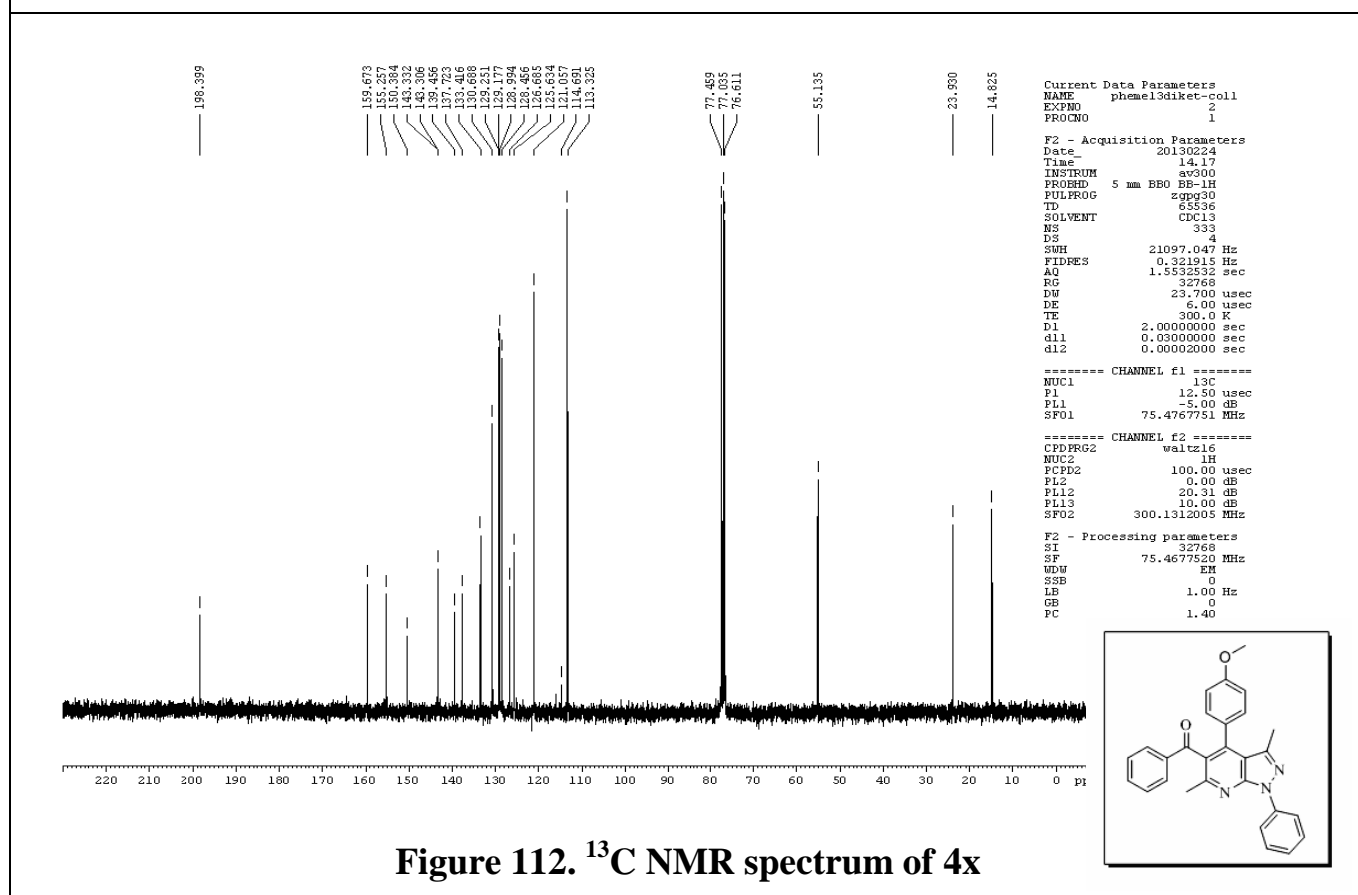

Figure 112.  $^{13}\text{C}$  NMR spectrum of 4x

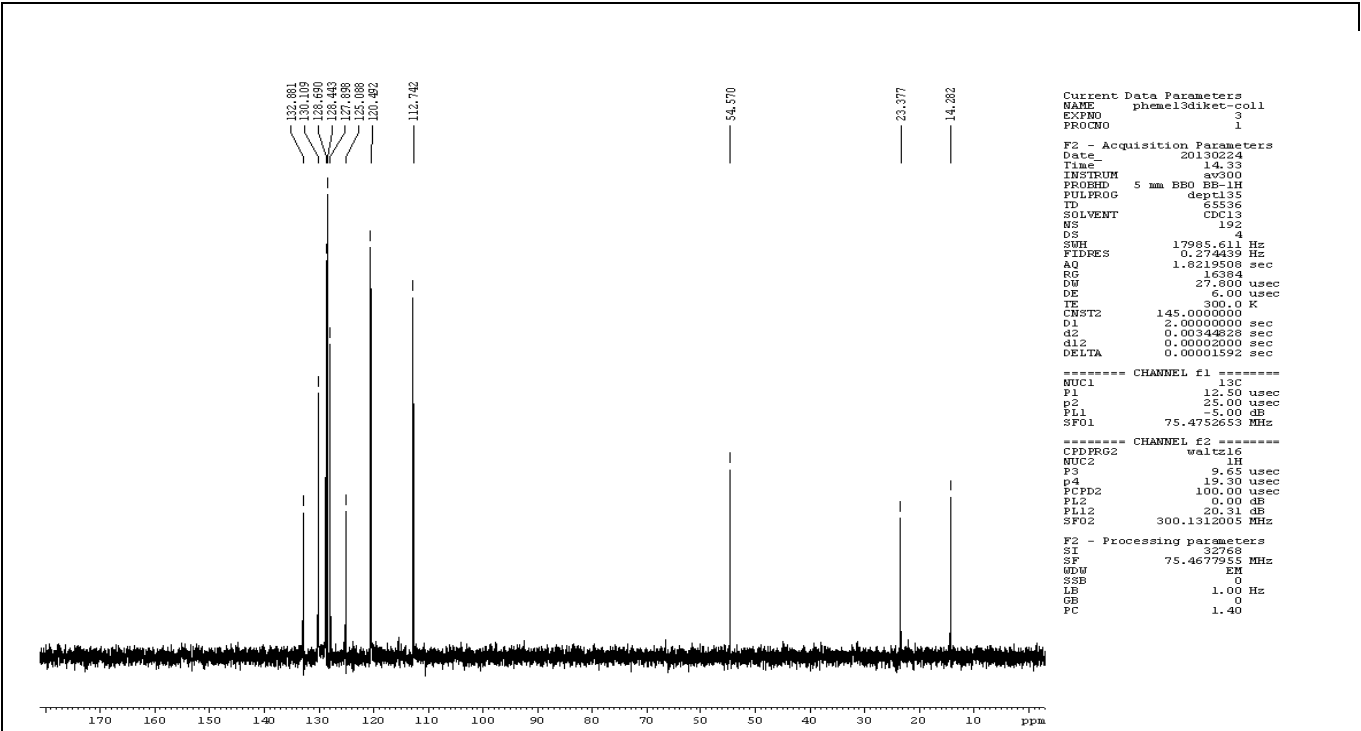

Figure 113.DEPT-135 spectrum of 4x

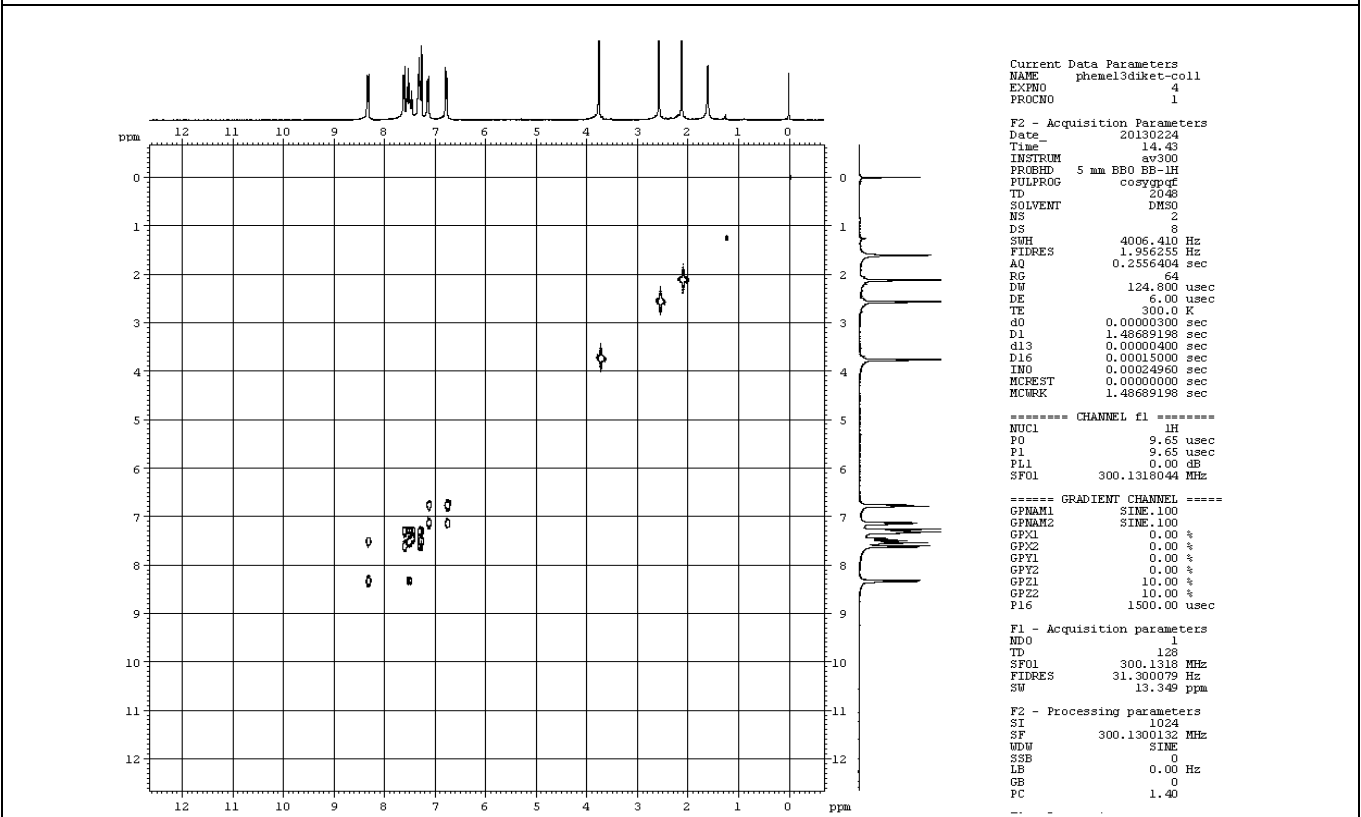

Figure 114. H,H-COSY spectrum of 4x

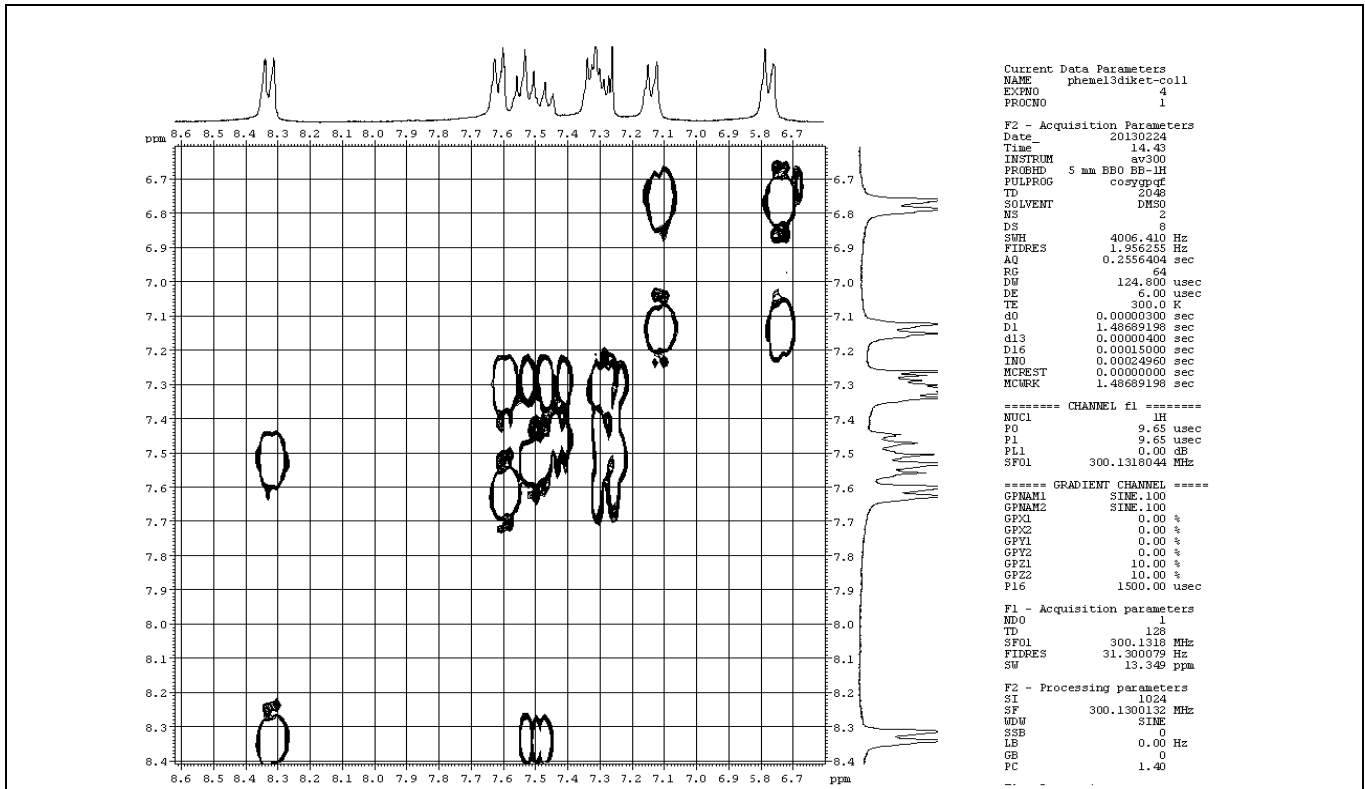

Figure 115. <sup>1</sup>H,<sup>1</sup>H-COSY spectrum of 4x-expansion

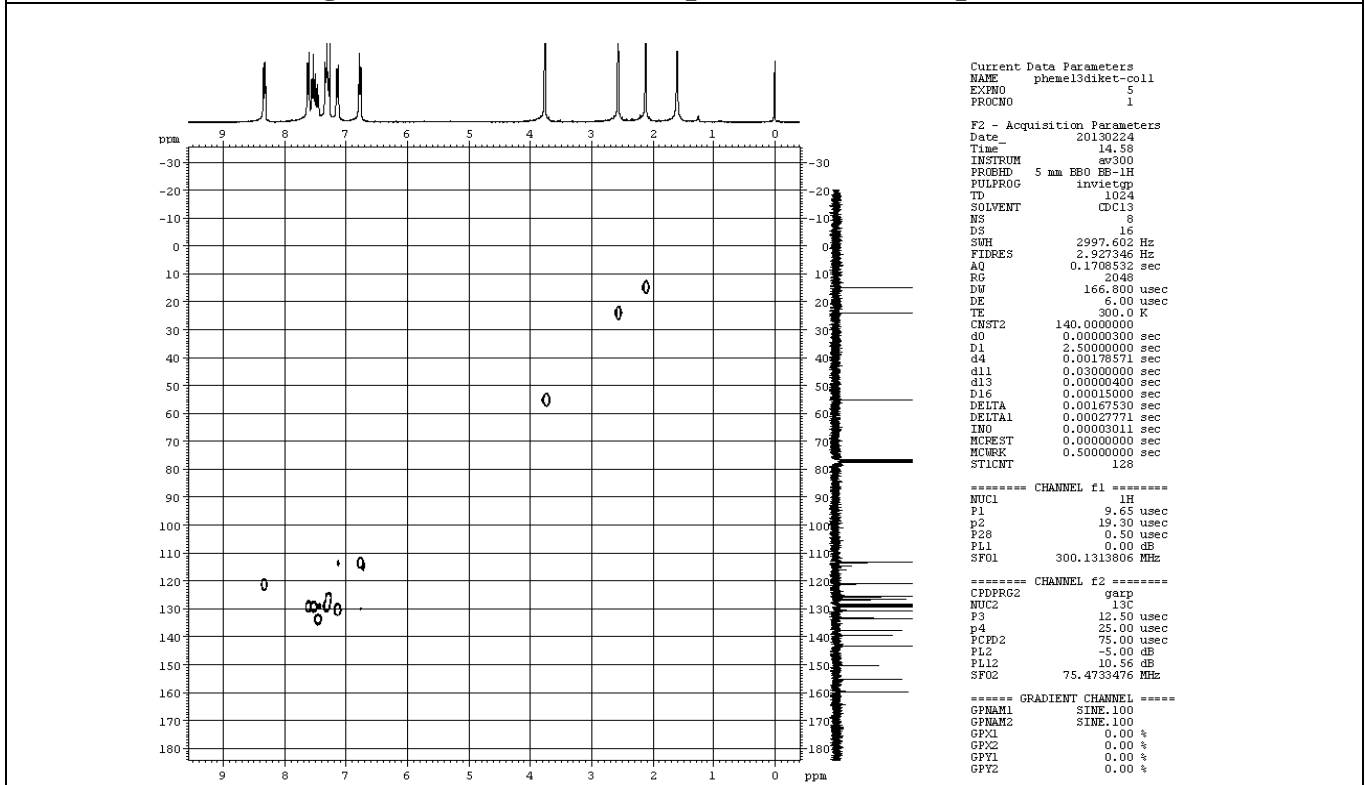

Figure 116. <sup>13</sup>C,<sup>1</sup>H-COSY spectrum of 4x

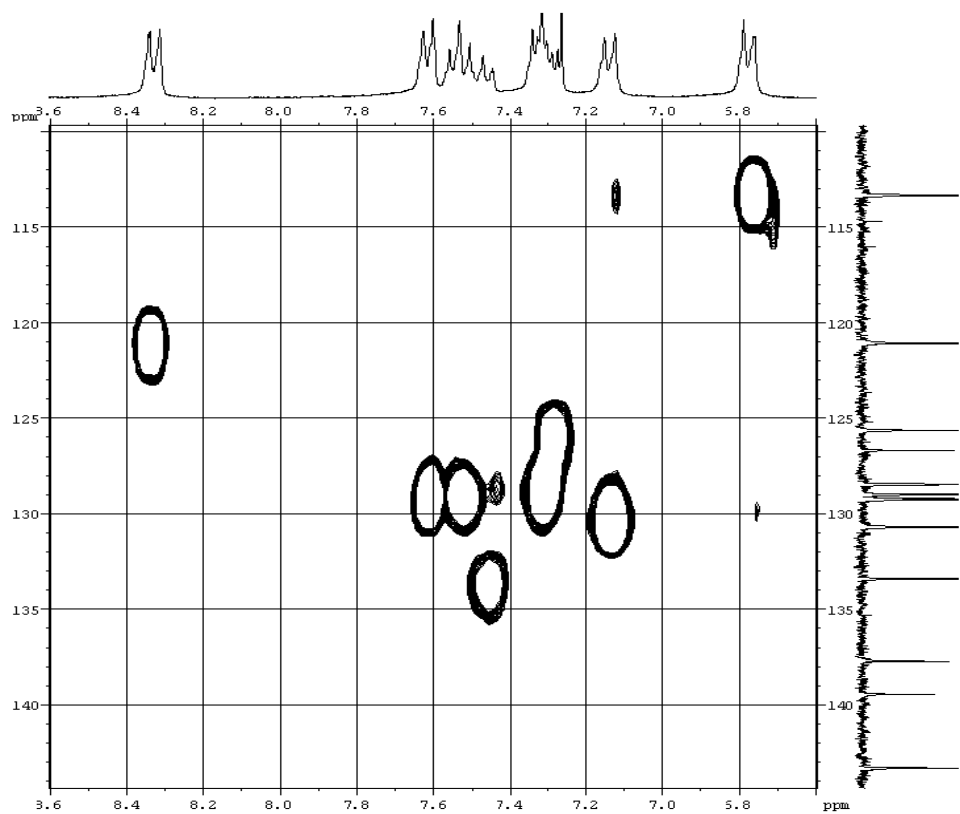

Figure 117. C,H-COSY spectrum of 4x-expansion

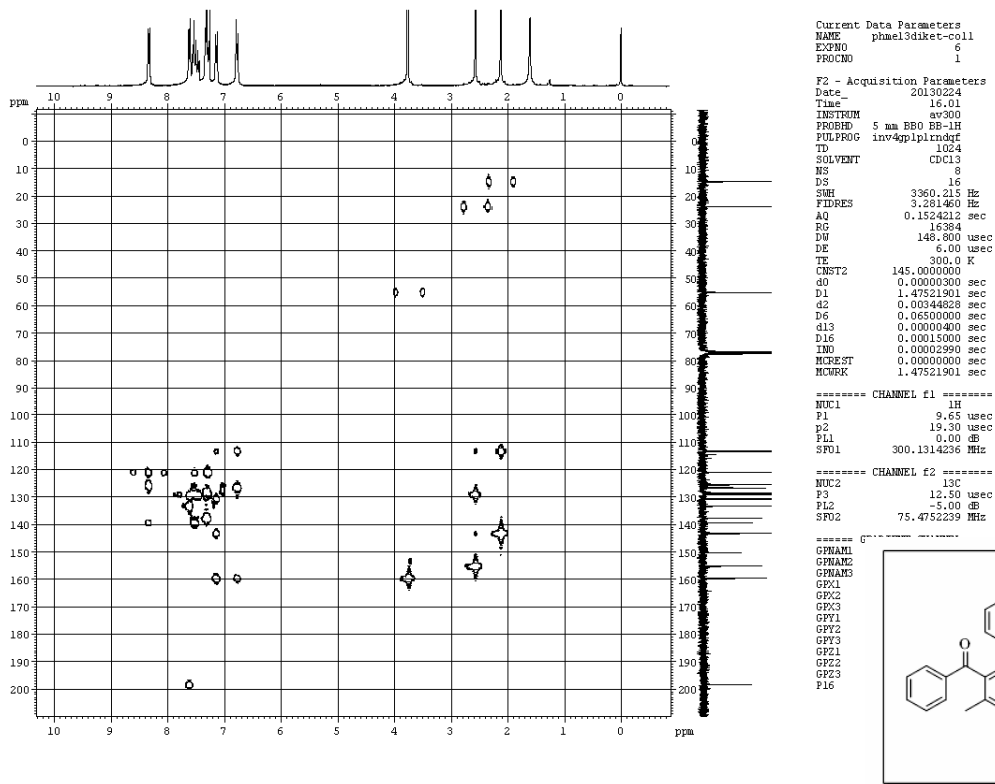

Figure 119. HMBC spectrum of 4x



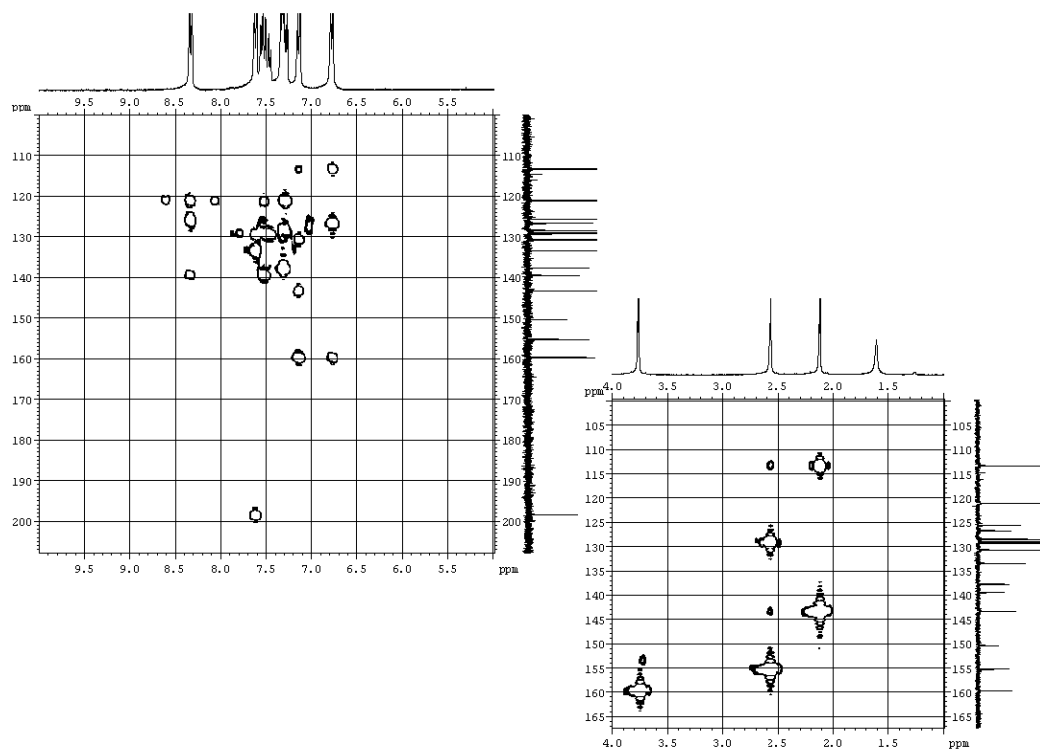

**Figure 120. HMBC spectrum of 4x-expansion1**

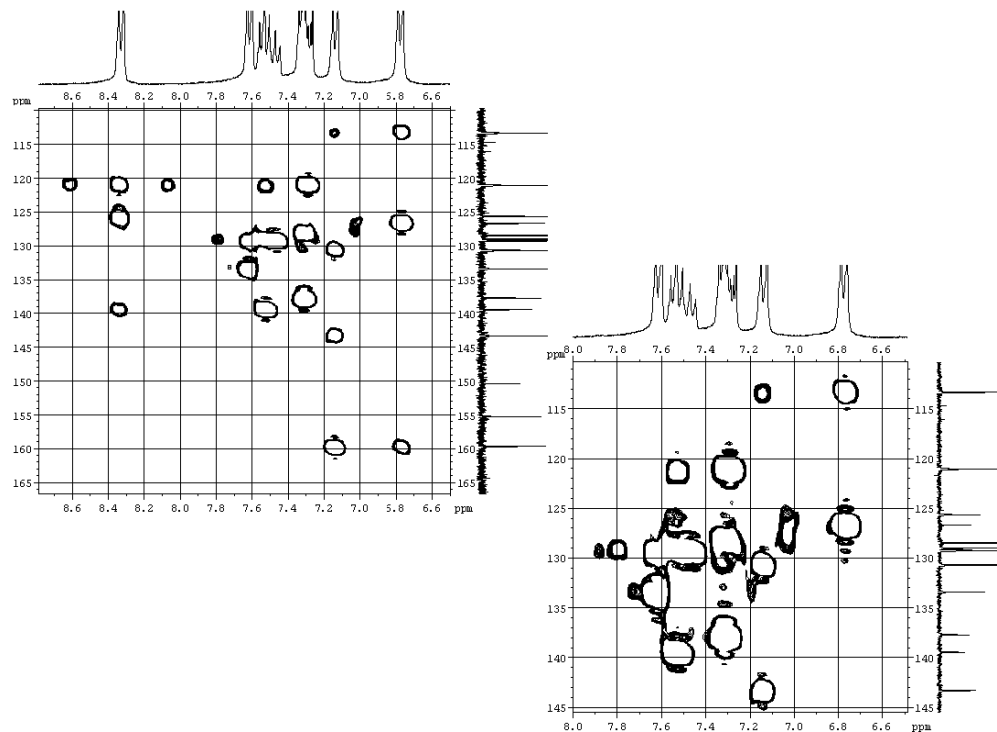

**Figure 121. HMBC spectrum of 4x-expansion2**

## **<sup>19</sup>F-NMR Spectrums**

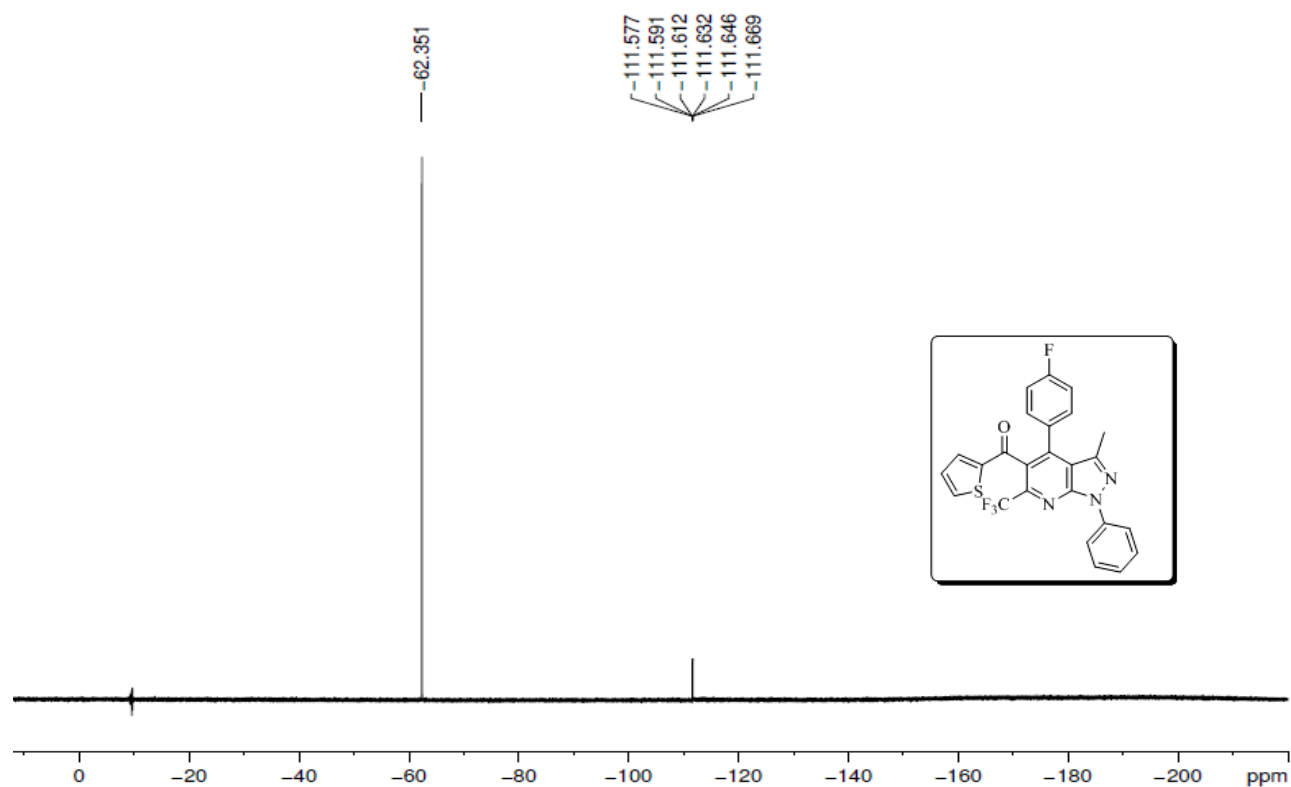

**Figure 118.** <sup>19</sup>F-NMR Spectrum of 4c

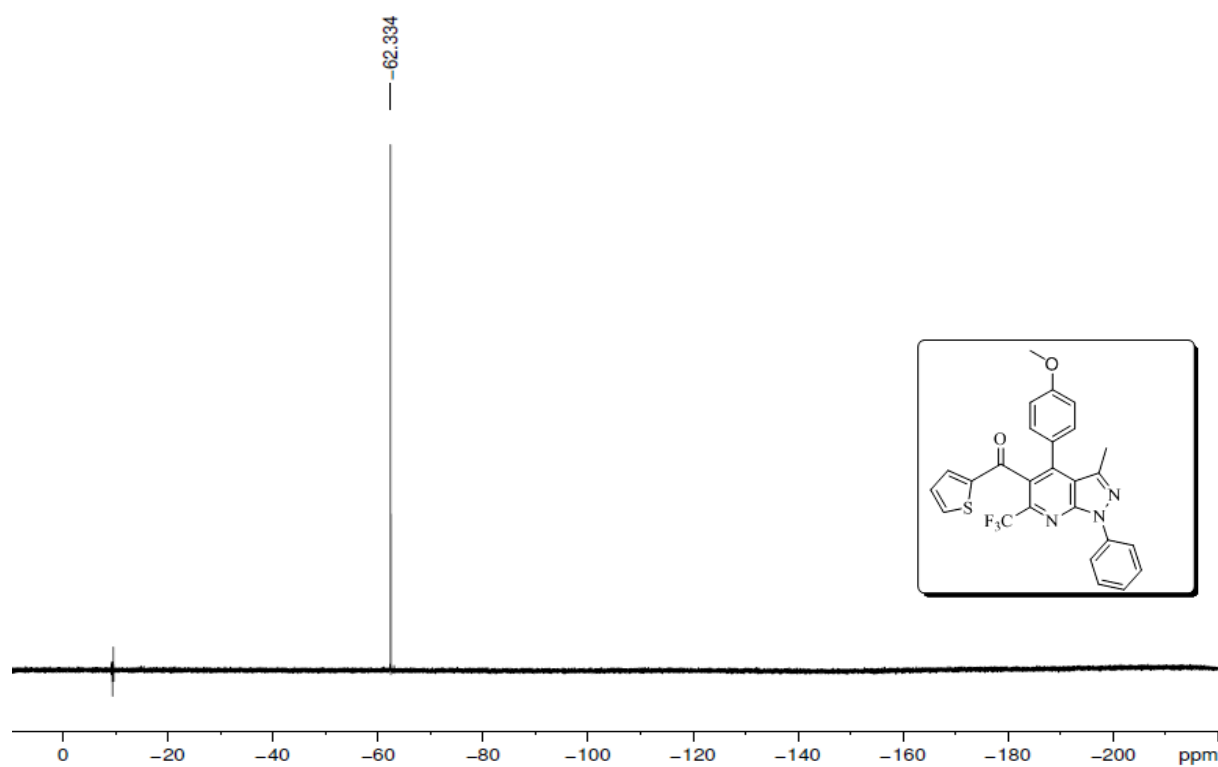

**Figure 119.** <sup>19</sup>F-NMR Spectrum of 4e

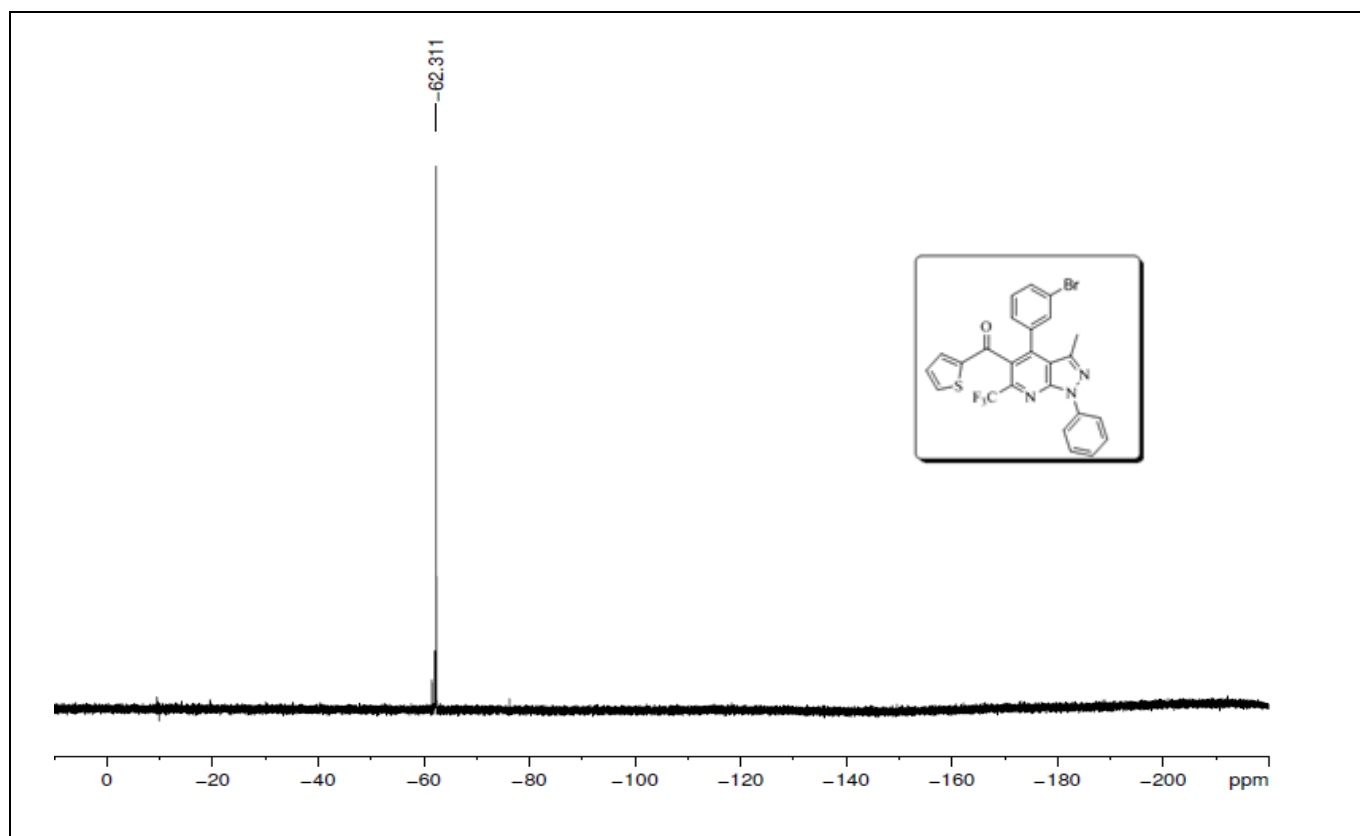

**Figure 120.**  $^{19}\text{F}$ -NMR Spectrum of 4h

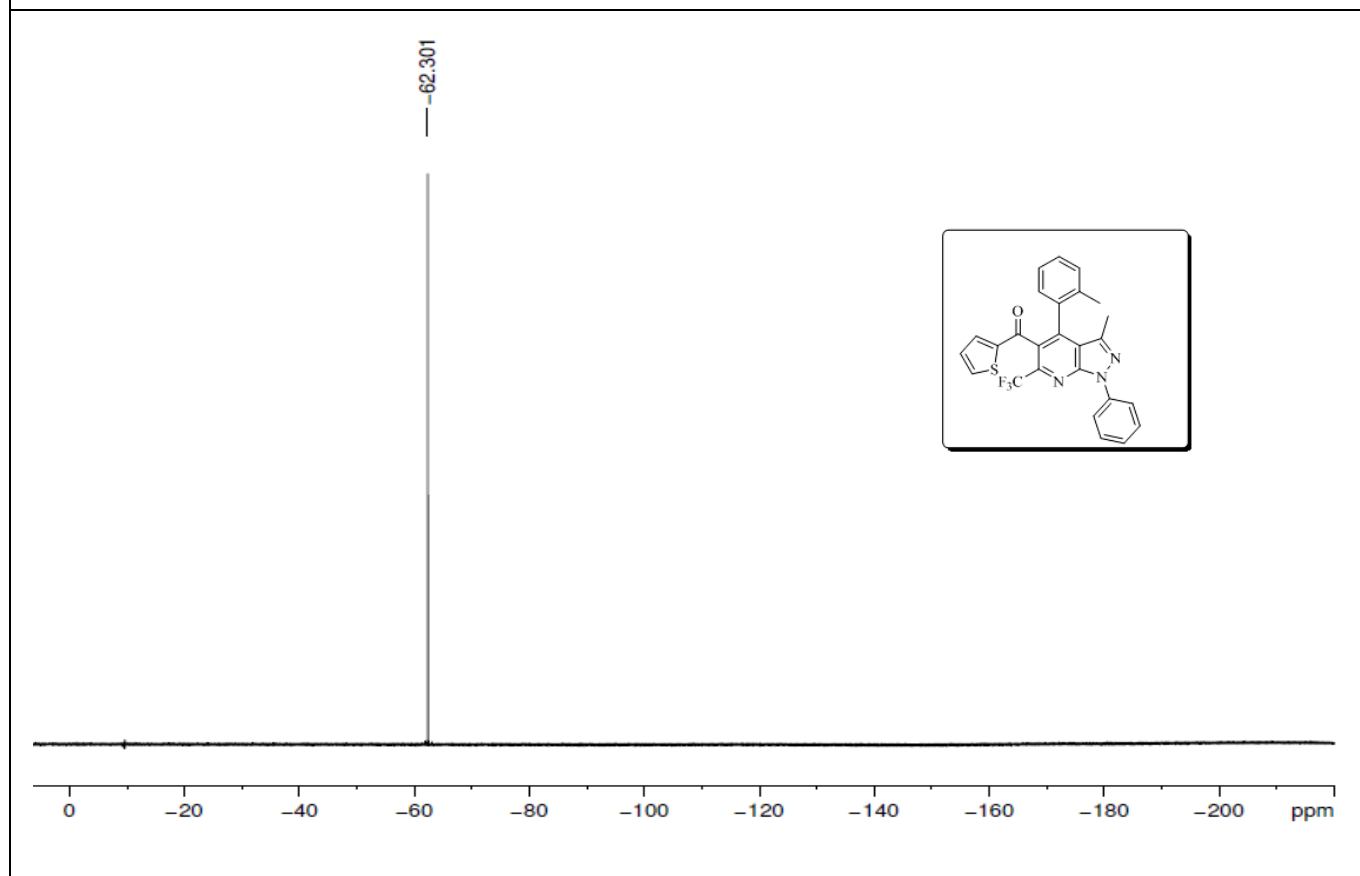

**Figure 121.**  $^{19}\text{F}$ -NMR Spectrum of 4j

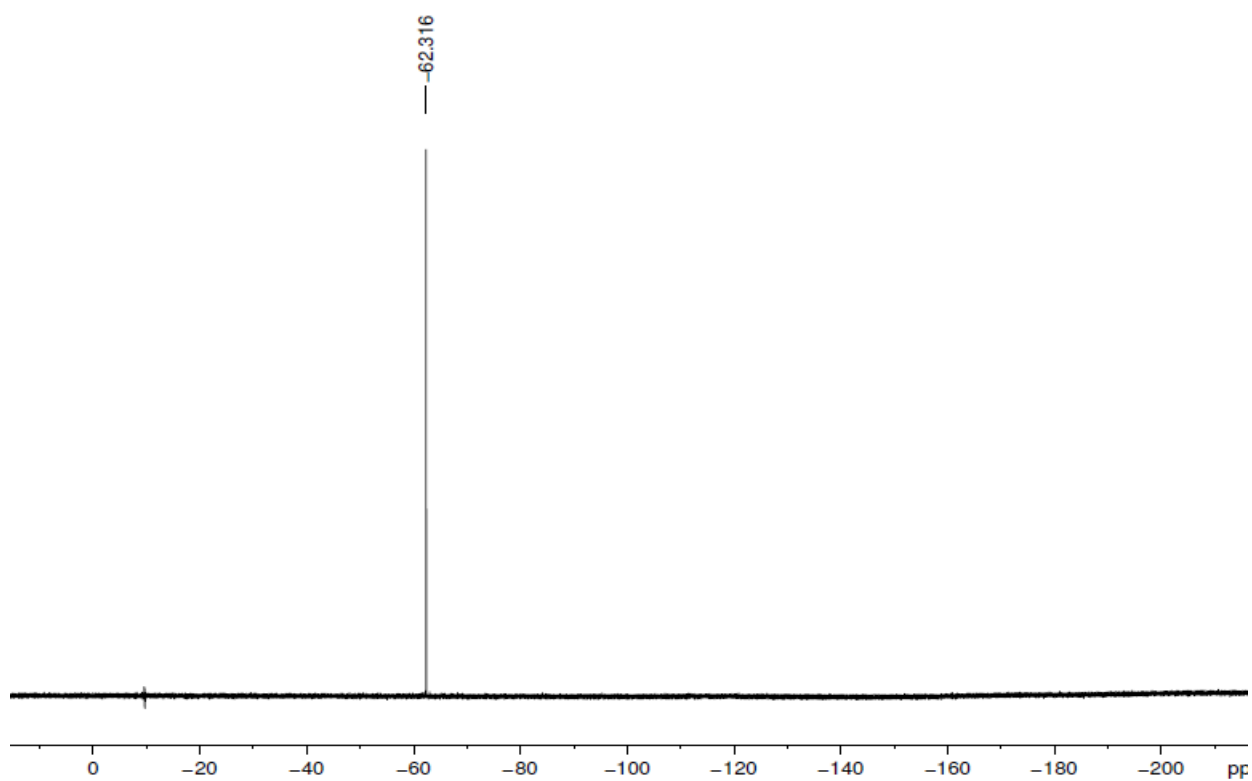

**Figure 122.**  $^{19}\text{F}$ -NMR Spectrum of 4l

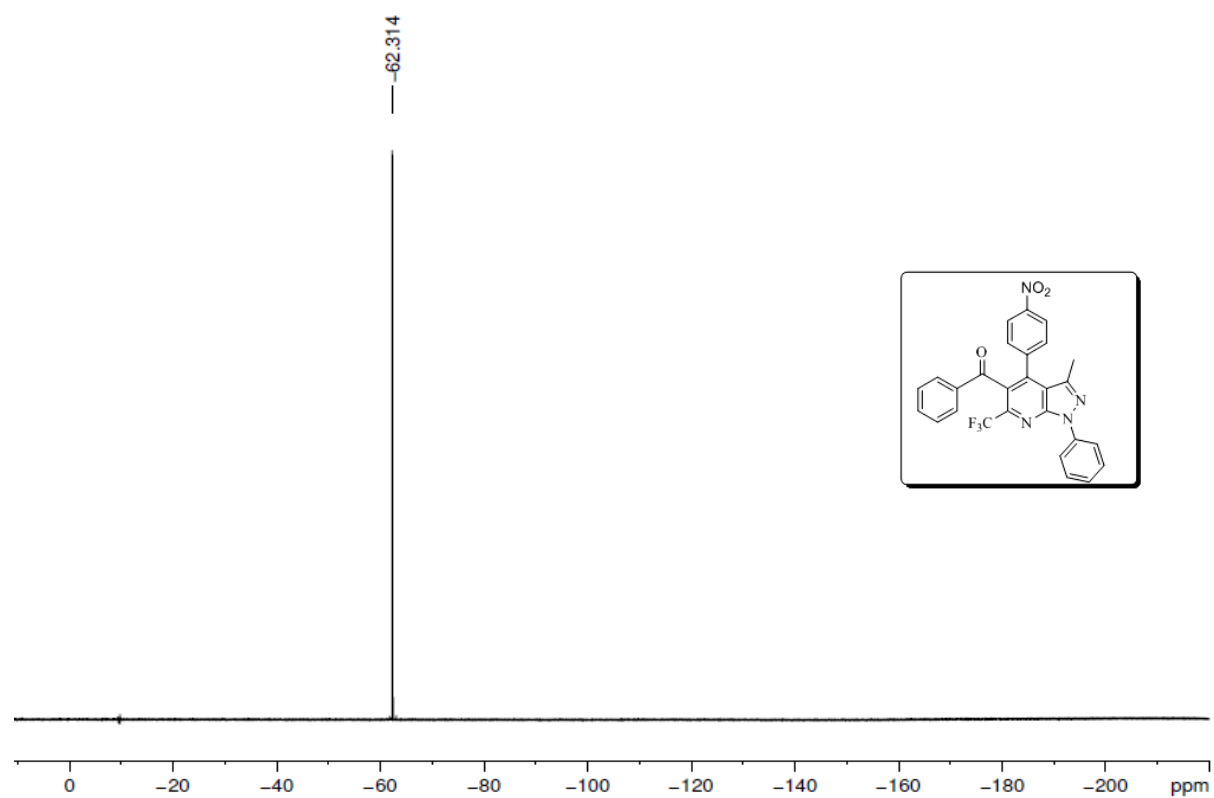

**Figure 123.**  $^{19}\text{F}$ -NMR Spectrum of 4m

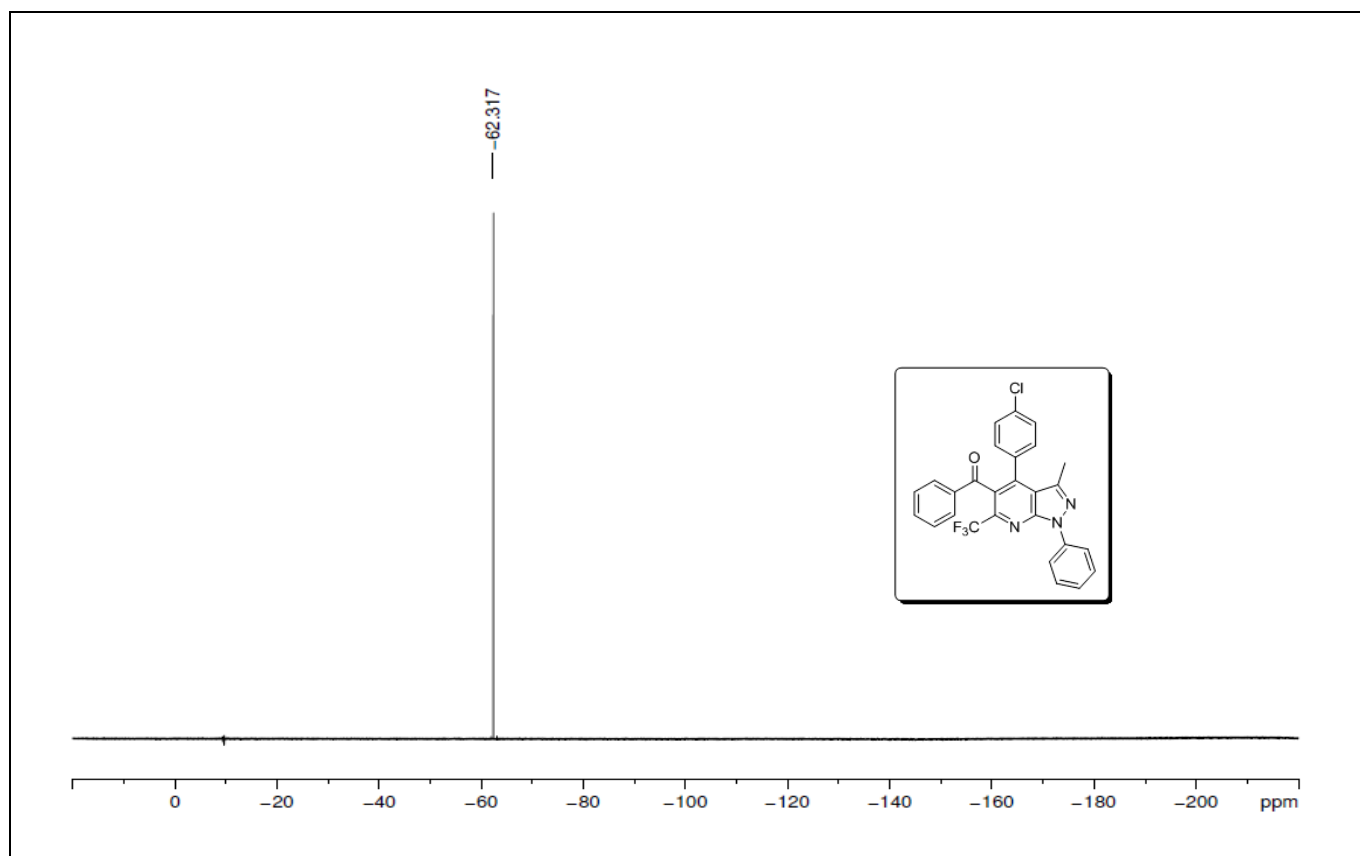

**Figure 124.**  $^{19}\text{F}$ -NMR Spectrum of 4n

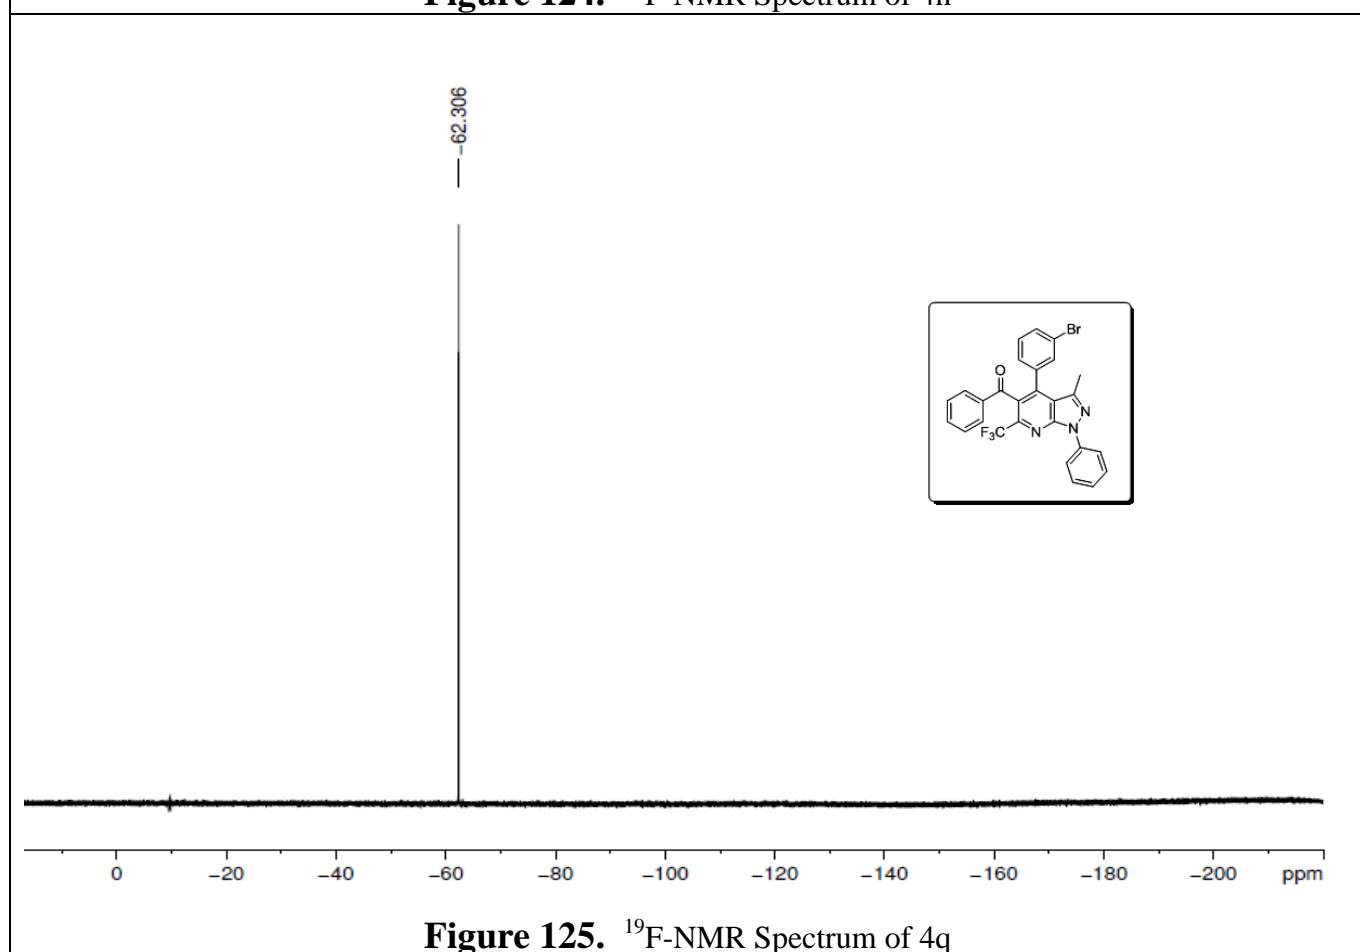

**Figure 125.**  $^{19}\text{F}$ -NMR Spectrum of 4q

## Mechanism study NMR spectra -intermediate identification from the reaction

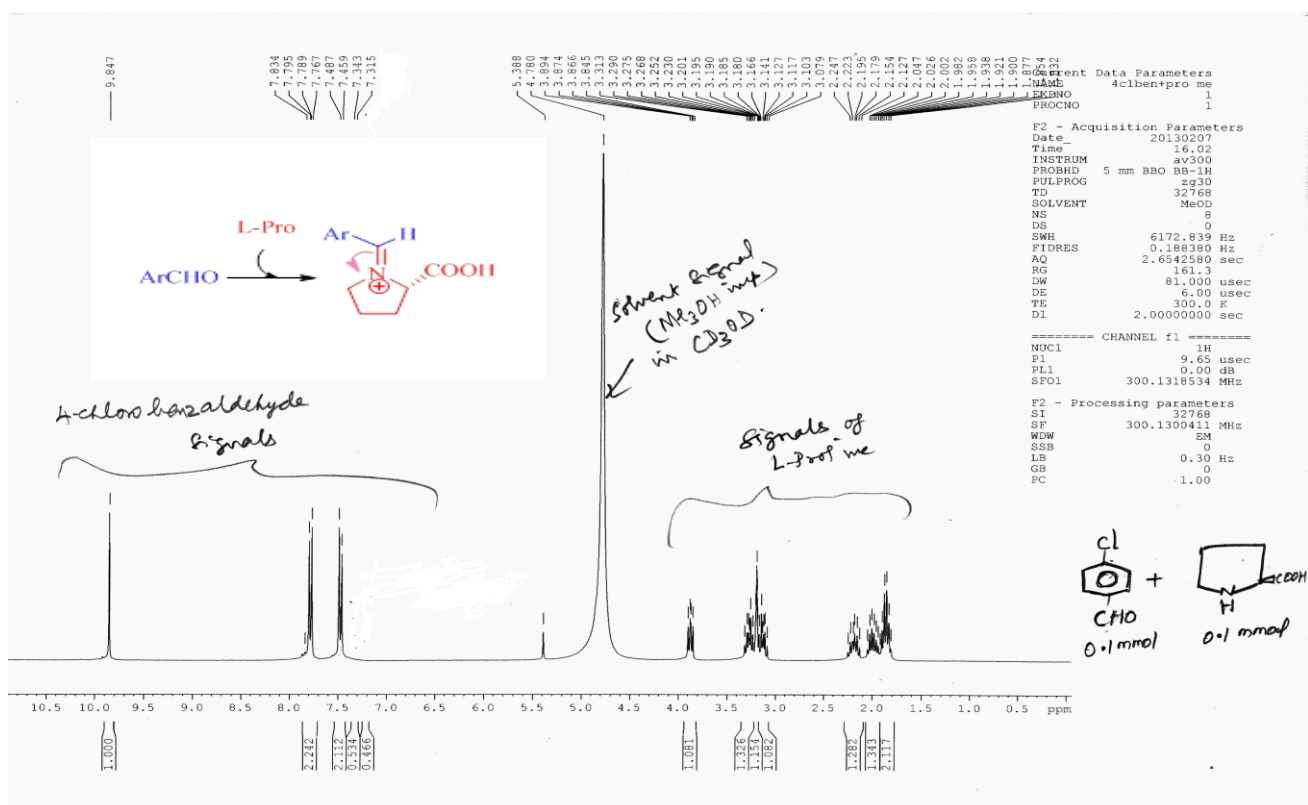

Figure 126. reaction mixture-1

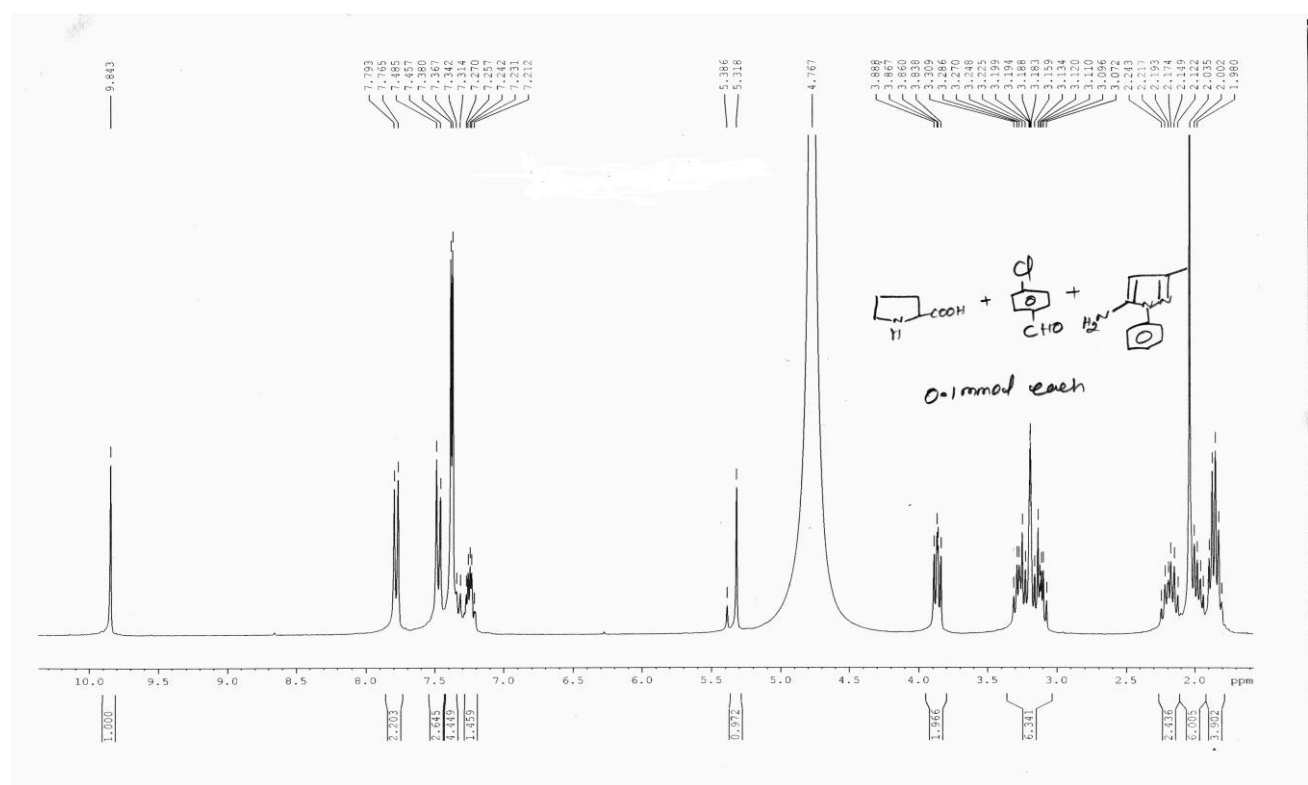

Figure 127. reaction mixture-2
